# Supplementary material for: Radical-initiated P,P-metathesis reactions of diphosphanes: evidence from experimental and computational studies
Source: Royal Society of Chemistry journal article supplement (doi:10.1039/d1dt01013a), 2021-01-01
Supplement: d1dt01013a1.pdf [file d1dt01013a1.pdf]

Electronic supporting information

**Radical-initiated P,P-metathesis reactions of diphosphanes: evidence from experimental and computational studies**

Callum Branfoot, Tom Young, Duncan F. Wass and Paul G. Pringle

Contents

|                                                                                       |    |
|---------------------------------------------------------------------------------------|----|
| 1.1 – General considerations .....                                                    | 1  |
| 1.2 – General synthetic procedure .....                                               | 2  |
| 1.3 – Synthesis of the unsymmetrical diphosphane <b>AE</b> .....                      | 3  |
| 1.4 – Diphosphane characterisation <sup>31</sup> P{ <sup>1</sup> H} NMR spectra ..... | 3  |
| 2 – Equilibrium studies .....                                                         | 7  |
| 3 – Qualitative kinetic studies .....                                                 | 17 |
| 3.1 – Kinetics of A <sub>2</sub> + E <sub>2</sub> .....                               | 17 |
| 3.2 – Kinetics of reverse AE metathesis.....                                          | 20 |
| 3.3 – Kinetics of B <sub>2</sub> + C <sub>2</sub> .....                               | 22 |
| 4 – <sup>31</sup> P NMR spectra for mechanistic investigations.....                   | 25 |
| 4.1 – Metathesis reactions not involving E <sub>2</sub> .....                         | 26 |
| 4.2 – Metathesis reactions involving <b>AE</b> or E <sub>2</sub> .....                | 27 |
| 5 – Computational details.....                                                        | 38 |
| 5.1 – Computational methods.....                                                      | 38 |
| 5.2 – Closed shell mechanistic possibilities .....                                    | 38 |
| 5.3 – Radical mechanistic possibilities.....                                          | 43 |
| 5.4 – UV-Vis interpretation.....                                                      | 50 |
| 5.5 – Cartesian coordinates .....                                                     | 53 |
| 6 – References .....                                                                  | 64 |

1.1 – General considerations

All manipulations were performed under an atmosphere of dry nitrogen or argon using standard glovebox and Schlenk techniques. All glassware was flame-dried prior to use. Anhydrous THF, DCM, Et<sub>2</sub>O and toluene were collected from a Grubbs-type solvent purification system, degassed via freeze-pump-thaw cycles and stored over 4 Å molecular sieves. CD<sub>2</sub>Cl<sub>2</sub>, CDCl<sub>3</sub> and C<sub>6</sub>D<sub>6</sub> were also degassed with freeze-pump-thaw cycles and dried over 4 Å molecular sieves. 1,4-dioxane was purchased from Alfa Aesar dried over 4 Å molecular sieves and sparged prior to use.

Diisopropylamine and triethylamine were purchased from Alfa Aesar and dried over 4 Å molecular sieves. Magnesium, Iodine, TEMPO, TTBP, NCS and each of the five chlorophosphines were purchased either from Sigma-Aldrich (Merck Chemicals) or Alfa Aesar and used as received.

Sonication experiments were performed using a Sonics Vibracell sonicator with a 13 mm probe and a custom (in-house prepared) Suslick cell with a Young's tap for Schlenk line attachment. All experiments were performed under a dry nitrogen atmosphere.

NMR experiments were conducted with conventional NMR tubes (wrapped with parafilm around the cap to delay oxidation onset) or amberised 500 MHz tubes (where stated) and performed on either a Jeol ECS 300, Jeol ECS 400 or a Bruker Nano 400 spectrometer, with  $^{31}\text{P}$  spectra referenced to 85%  $\text{H}_3\text{PO}_4$ . Low temperature and kinetics experiments were performed on a Jeol ECS 300 spectrometer, with inverse-gated decoupling in the case of kinetics experiments.

UV-Vis experiments were performed with an Agilent Technologies Cary 300 UV-Vis in double beam mode (absorption). 20  $\mu\text{M}$  solutions of diphosphane in  $\text{CH}_2\text{Cl}_2$  were prepared under a dry nitrogen atmosphere and baselined with respect to a  $\text{CH}_2\text{Cl}_2$  blank.

Photolysis experiments were performed with a NightSearcher handheld LED UV lamp (5 W,  $\lambda_{\text{max}} = 365$  nm). Product specifications indicate irradiance values of 1.65  $\text{W m}^{-2}$  in the near UV (UVA) and 0.00211  $\text{W m}^{-2}$  in the UVC-UVC region.

## 1.2 – General synthetic procedure

The synthesis of diphosphanes **A**<sub>2</sub>–**C**<sub>2</sub> and **E**<sub>2</sub> was performed as exemplified by the synthesis of tetraphenyldiphosphane, **A**<sub>2</sub>:

To a Schlenk flask equipped with a stirrer bar, of magnesium (440 mg, 18.1 mmol) and 2 crystals of iodine were added prior to flame-drying *in vacuo*. THF (30 ml) was added and the mixture was then stirred vigorously at room temperature for 30 min. Chlorodiphenylphosphine (1.63 ml, 2.00 g, 9.05 mmol) was added dropwise and left to stir overnight. The solution was then filtered from the excess magnesium via cannula, and the THF removed *in vacuo*. Toluene (30 ml) was then added and to the resultant solution followed by 1,4-dioxane (1.54 ml, 18.1 mmol) and the mixture stirred vigorously for 5 min and then left to stand for 5 h. The solution was then cannula filtered again, and the toluene removed under reduced pressure yielding the product **A**<sub>2</sub> as a white powder (1.255 g, 75%).

Each of these diphosphanes was produced in approximately 75% yield as white powders with the exception of **C**<sub>2</sub> which was a pale-yellow powder.

Diphosphane **D**<sub>2</sub> was prepared in an analogous fashion in refluxing  $\text{Et}_2\text{O}$  over the course of 5 days. The crude product was isolated as above and then filtered through an alumina plug to remove residual chlorophosphine and secondary phosphine oxide. The final product was isolated as a white powder (214 mg, 23%) containing ~10% secondary phosphine side product.

To determine the level of residual chlorophosphine contamination in the synthesised diphosphanes, a concentrated sample was made and the  $^{31}\text{P}$  NMR spectrum measured. For example a solution of **A**<sub>2</sub> (100  $\text{mg ml}^{-1}$ ) was analysed by  $^{31}\text{P}$  NMR (400 MHz, THF). From ESI 1.1 there is no evidence of chlorophosphine. The signal:noise ratio of this spectrum indicates that 0.05% contamination would be readily detected. It was concluded that there is a maximum of 0.05% chlorophosphine content.

pp/cb2741 tetraphenyldiphos 100 mg/ml  
single pulse decoupled gated NOE

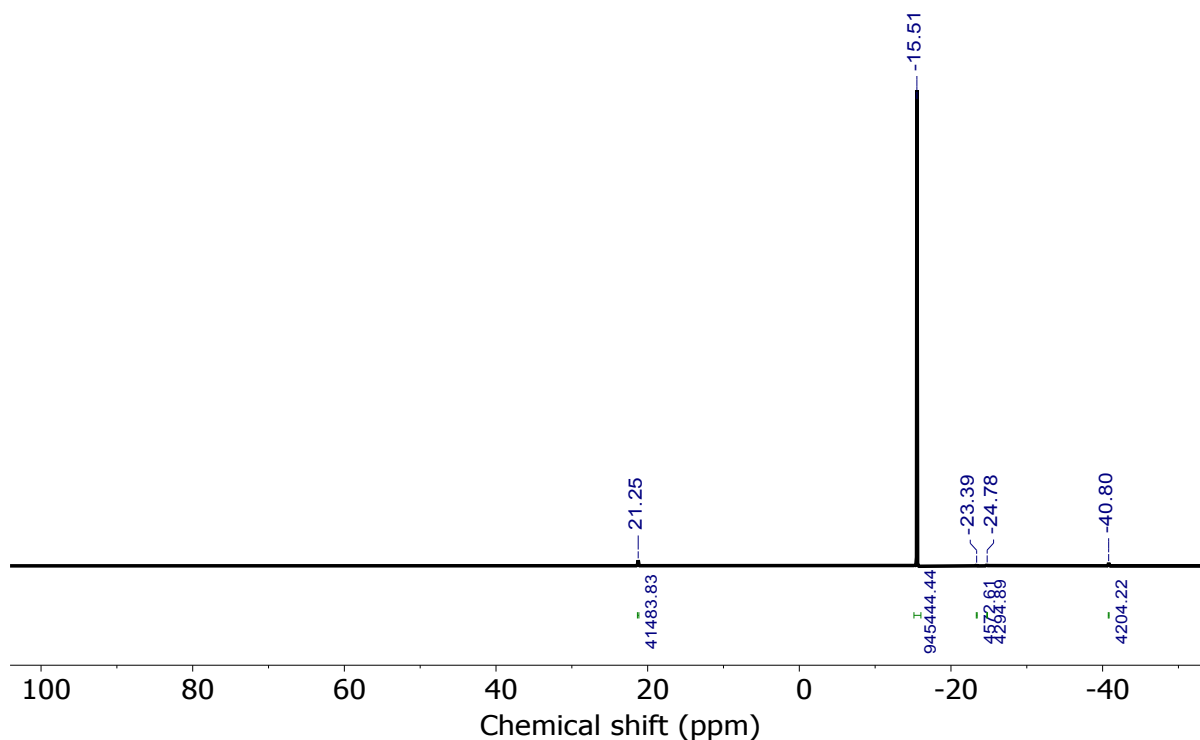

**ESI 1.1.** Tetraphenyldiphosphane (**A<sub>2</sub>**) in THF at concentrations of 100 mg ml<sup>-1</sup>.

### 1.3 – Synthesis of the unsymmetrical diphosphane **AE**

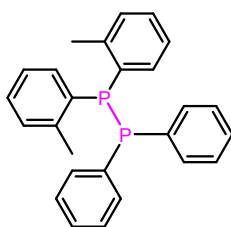

**AE**

Di(*ortho*-tolyl)phosphine (258 mg, 1.20 mmol) was added to a Schlenk flask and dissolved in CH<sub>2</sub>Cl<sub>2</sub> (5 ml). This solution was then cooled to 0 °C prior to the slow addition of borane-dimethylsulfide complex (1.23 ml, 100 mg, 1.32 mmol). After 1.5 h the solvent was removed *in vacuo*. The residue was then triturated with hexane (5 ml), that was removed *in vacuo* prior to the addition of tetrahydrofuran (5 ml). The resultant borane-protected phosphine solution was cooled to -78 °C prior to the dropwise addition of *n*-butyllithium (0.83 ml, 1.32 mmol, 1.6 M), which resulted in the formation of a deep orange solution.

After 35 min, chlorodiphenylphosphine (0.216 ml, 266 mg, 1.20 mmol) was added dropwise and the reaction was left to stir at -78 °C for 5 h. The reaction mixture was then allowed to warm to room temperature and diethylamine (0.5 ml, 354 mg, 4.83 mmol) added. After 1 h, volatiles were removed *in vacuo* affording a white powder. The crude product was then filtered by cannula to a second Schlenk flask in toluene (3 x 10 ml), yielding the unsymmetrical diphosphane **AE** in 80 % purity. This product was then recrystallized from hot methanol (30 ml) affording the pure product **AE** as a colourless crystalline solid (65 mg, 14 % yield). <sup>1</sup>H NMR (400 MHz, C<sub>6</sub>D<sub>6</sub>): 7.88 (m, 2H, *ArH*), 7.49 (m, 4H, *ArH*), 6.96 (m, 10H, *ArH*), 6.84 (m, 2H, *ArH*), 2.07 (s, CH<sub>3</sub>). <sup>31</sup>P{<sup>1</sup>H} NMR (162 MHz, C<sub>6</sub>D<sub>6</sub>): -35.1 (d, *J*<sub>PP</sub> 150.4 Hz, *P*(Ph)); -16.3 (d, *J*<sub>PP</sub> 150.4 Hz, *P*(*o*-Tol). MS (APCI+) *m/z*: [M+H<sup>+</sup>] 399.1412 (theor. 399.1426).

### 1.4 – Diphosphane characterisation <sup>31</sup>P{<sup>1</sup>H} NMR spectra

Tetraphenyldiphosphane **A<sub>2</sub>**

$^{31}\text{P}\{^1\text{H}\}$  NMR ( $\text{CD}_2\text{Cl}_2$ ): -15.5 (s).

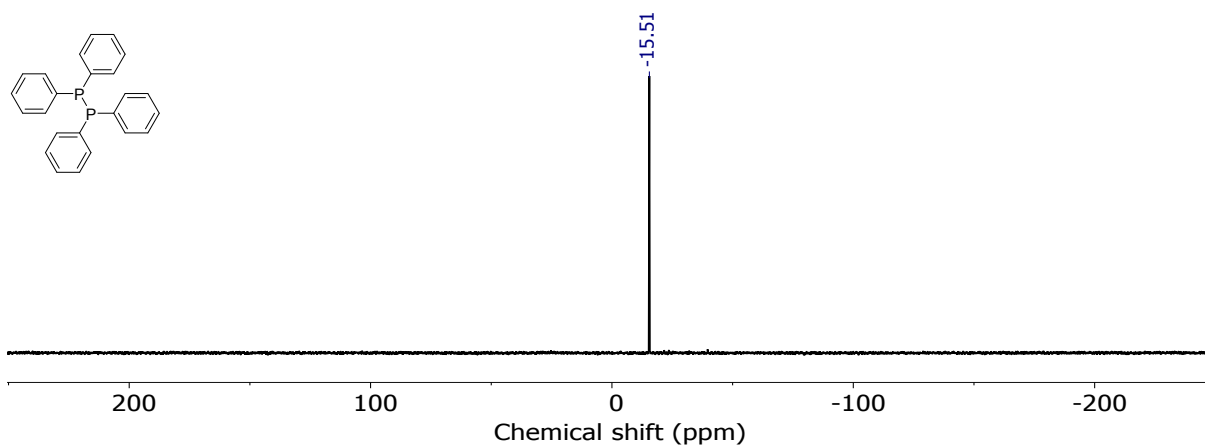

Tetra(*p*-tolyl)diphosphane **B<sub>2</sub>**

$^{31}\text{P}\{^1\text{H}\}$  NMR ( $\text{CDCl}_3$ ): -16.9 (s).

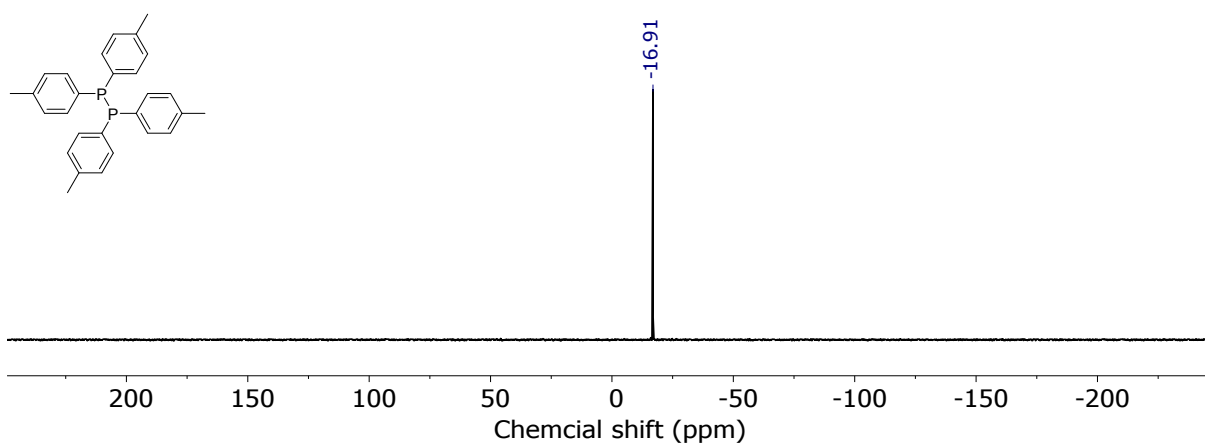

Tetra(*p*-anisyl)diphosphane **C<sub>2</sub>**

$^{31}\text{P}\{^1\text{H}\}$  NMR ( $\text{CD}_2\text{Cl}_2$ ): -15.2 (bs).

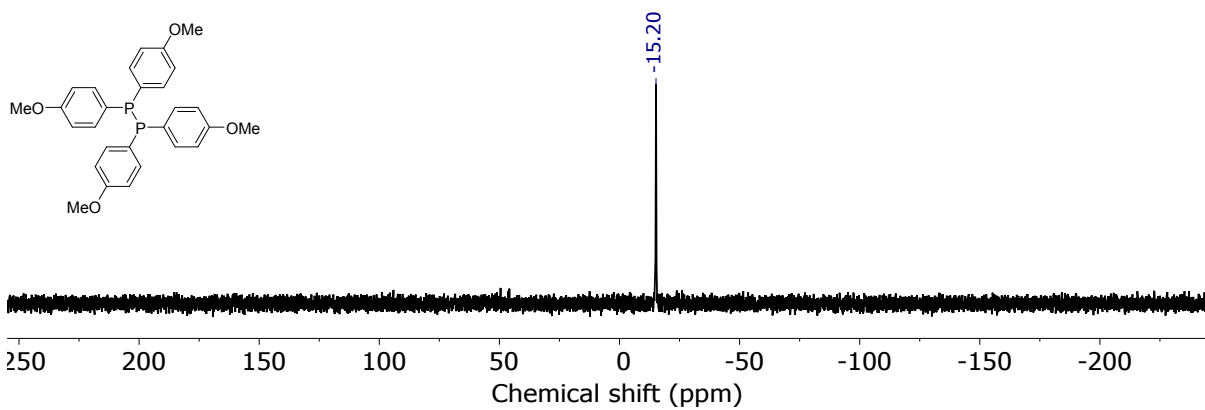

Tetra(3,5-bis(trifluoromethyl)phenyl)diphosphane **D<sub>2</sub>**

$^{31}\text{P}\{^1\text{H}\}$  NMR (THF): -12.6 (s).

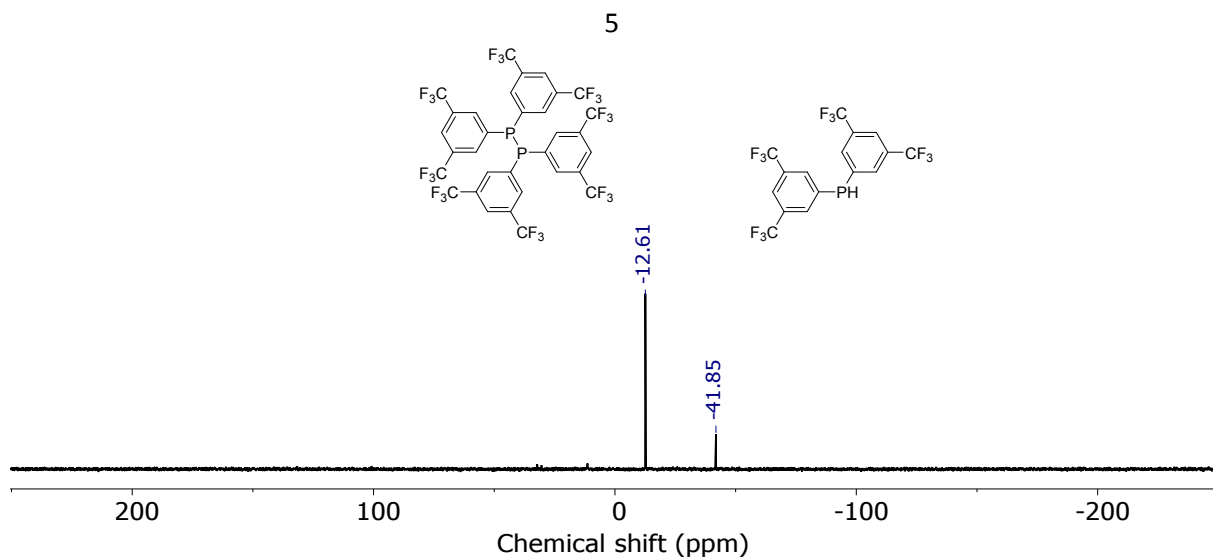

Tetra(*o*-tolyl)diphosphane **E<sub>2</sub>**

$^{31}\text{P}\{^1\text{H}\}$  NMR ( $\text{CDCl}_3$ ): -35.3 (s).

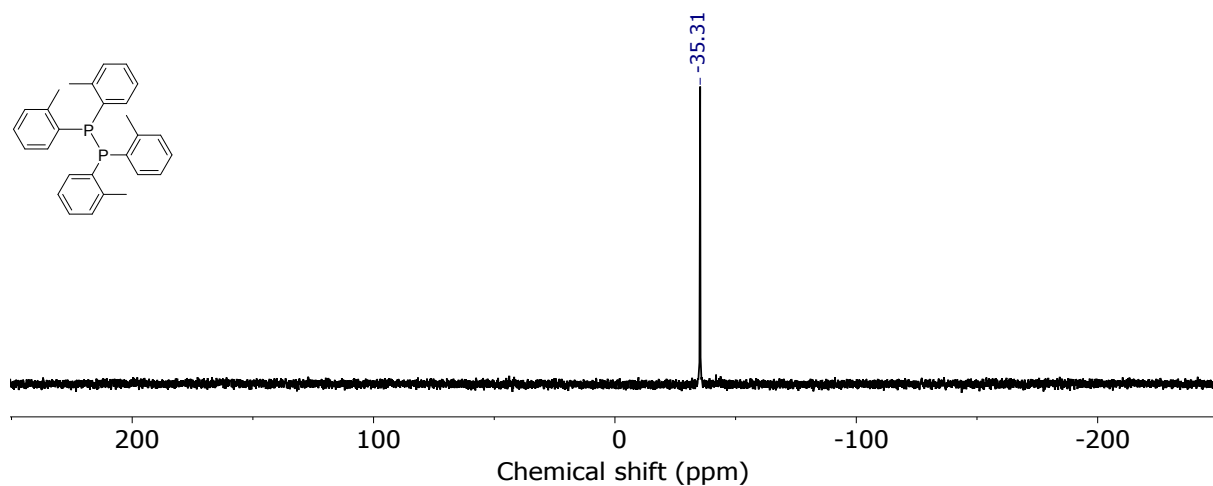

1,1-diphenyl-2,2-di-*o*-tolylidiphosphane **AE**

$^{31}\text{P}\{^1\text{H}\}$  NMR ( $\text{CDCl}_3$ ): -16.3 (d), -35.1 (d).

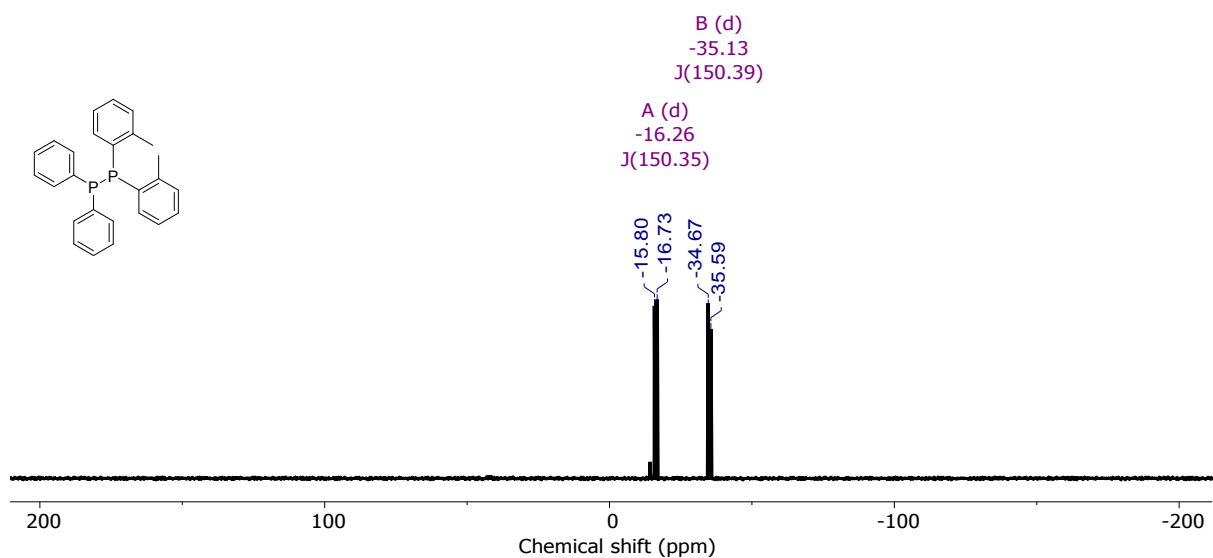

$^1\text{H}$  NMR ( $\text{C}_6\text{D}_6$ )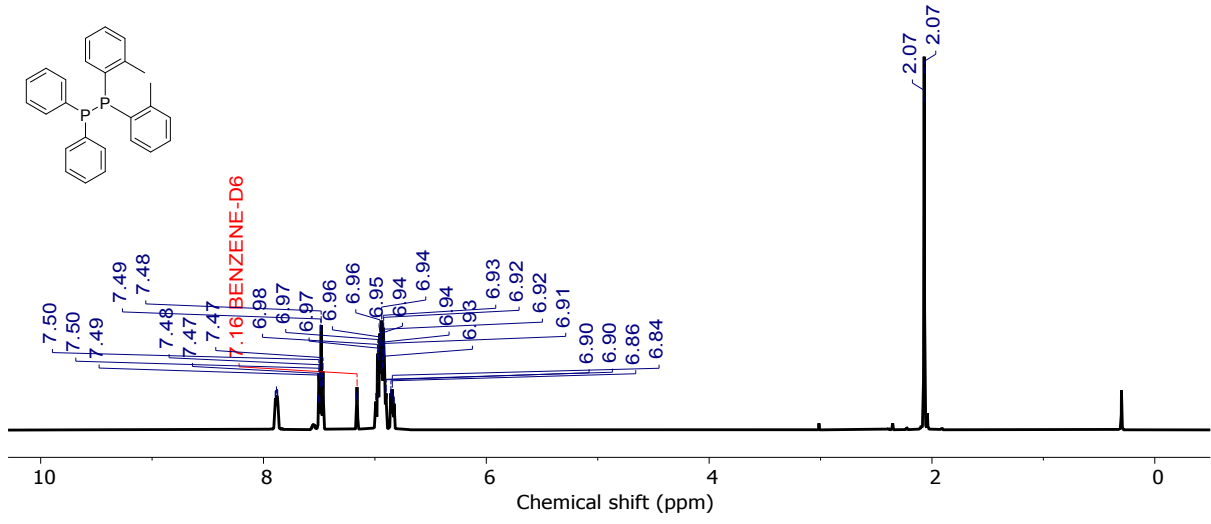



$2^b$  $A_2$  $C_2$ 

pp/cb38102 cb064(4)B\_10 mins later  
single pulse decoupled gated NOE

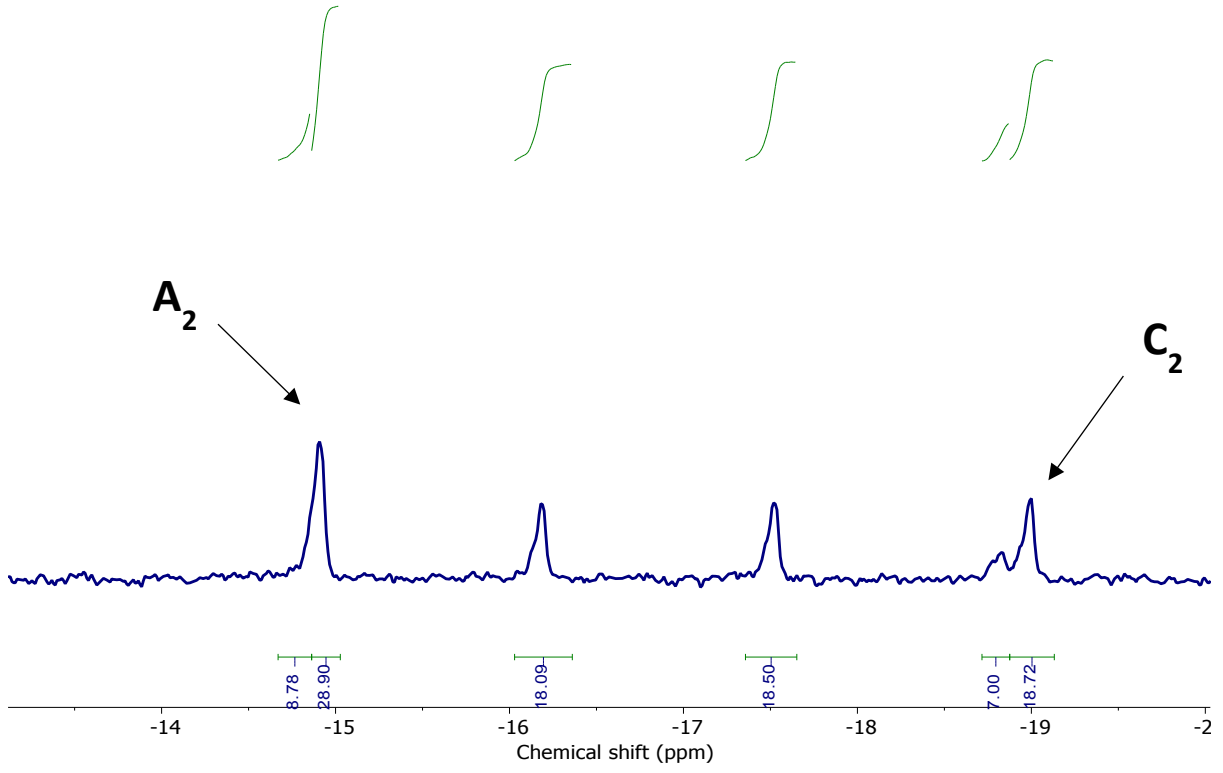



$3^c$  $A_2$  $D_2$ 

pp/cb37687 cb086(1)A  
single pulse decoupled gated NOE

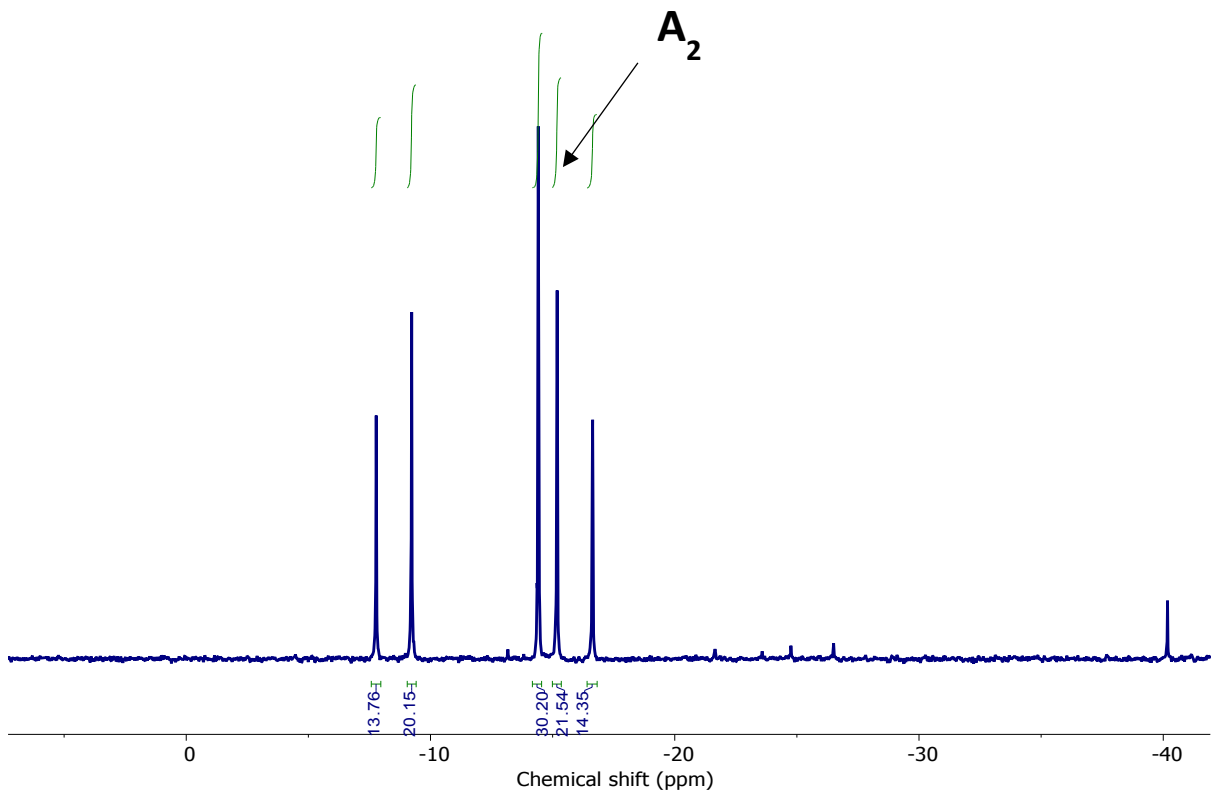

$4^c$  $B_2$  $C_2$ 

pp/cb37666 cb085(1)A  
single pulse decoupled gated NOE

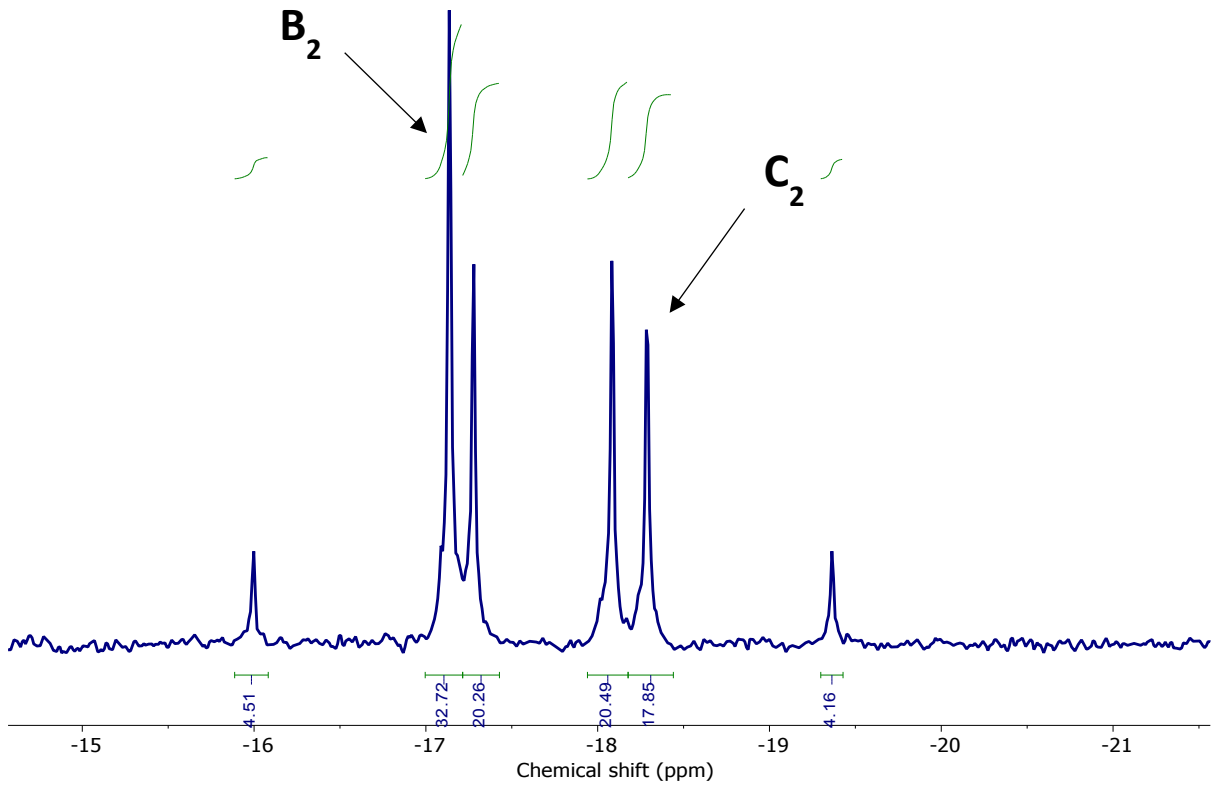

$5^b$  $B_2$  $D_2$ pp/cb37795 cb094(1)A  
single pulse decoupled gated NOE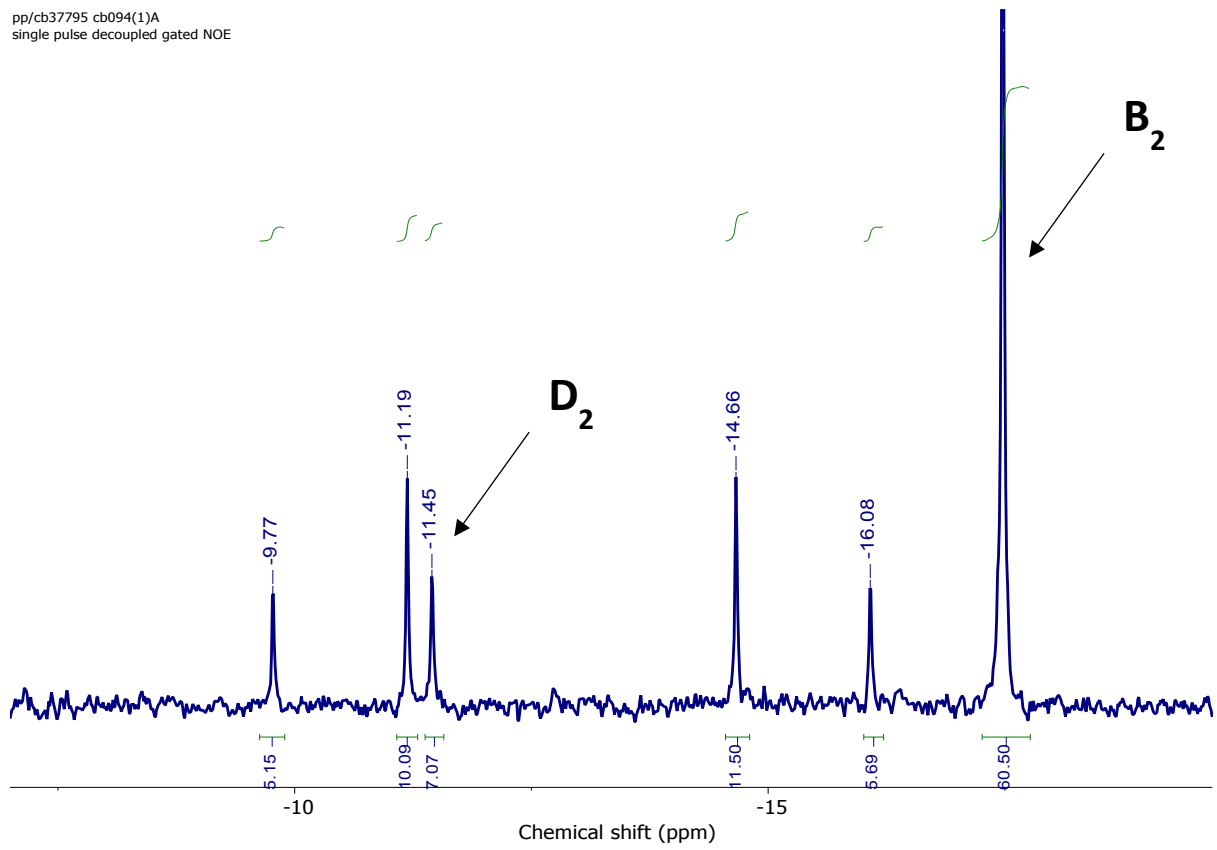

$6^b$  $C_2$  $D_2$ 

pp/cb37796 cb095(1)A  
single pulse decoupled gated NOE

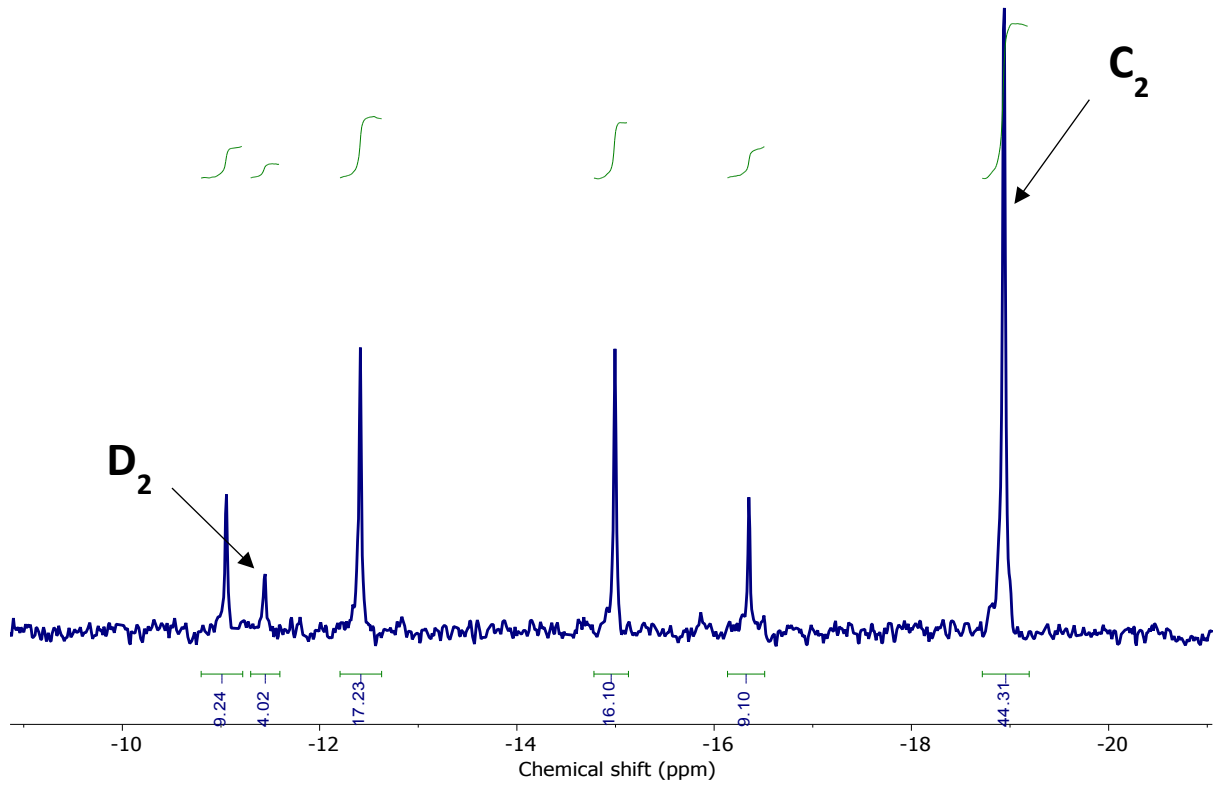

7<sup>a</sup>

A<sub>2</sub>

E<sub>2</sub>

pp/cb37809 cb005(38) kinetics  
single pulse decoupled gated NOE

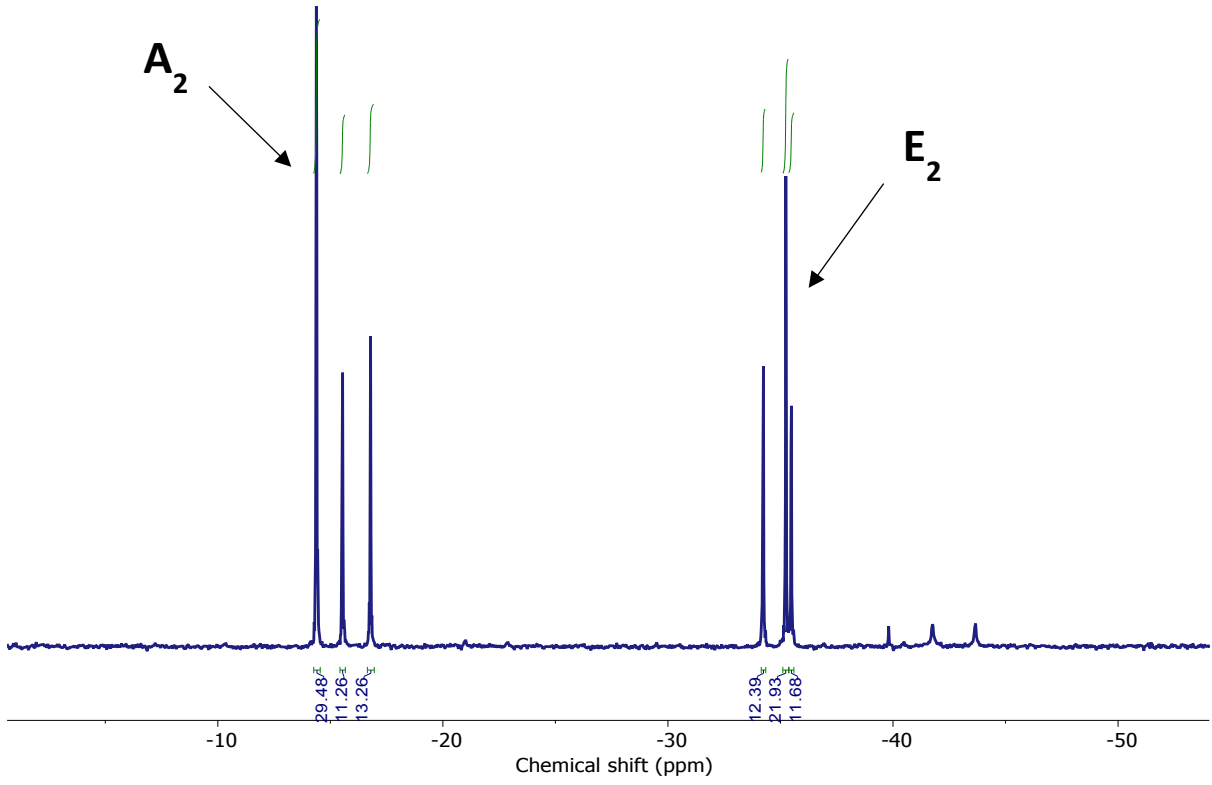

$8^a$  $B_2$  $E_2$ pp/cb41333 cb148(1)C  
single pulse decoupled gated NOE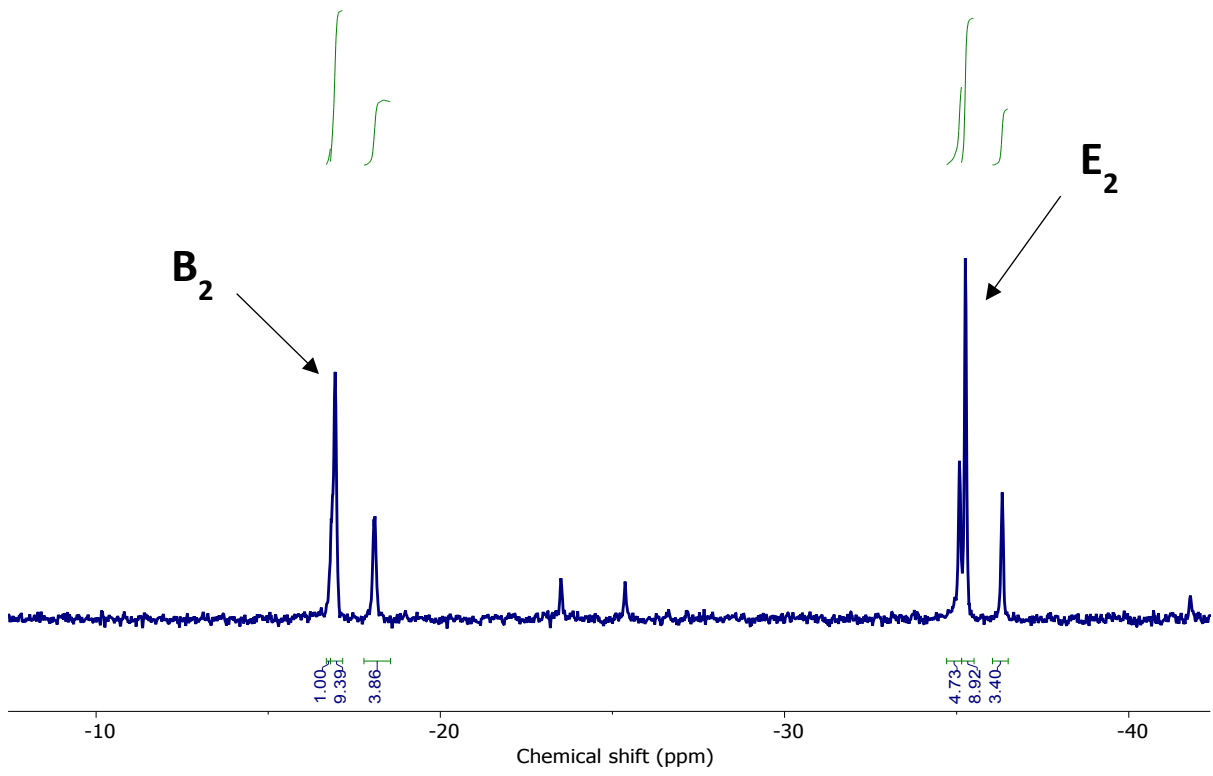

$g^a$  $C_2$  $E_2$ 

pp/cb41488 cb155(1)B  
single pulse decoupled gated NOE

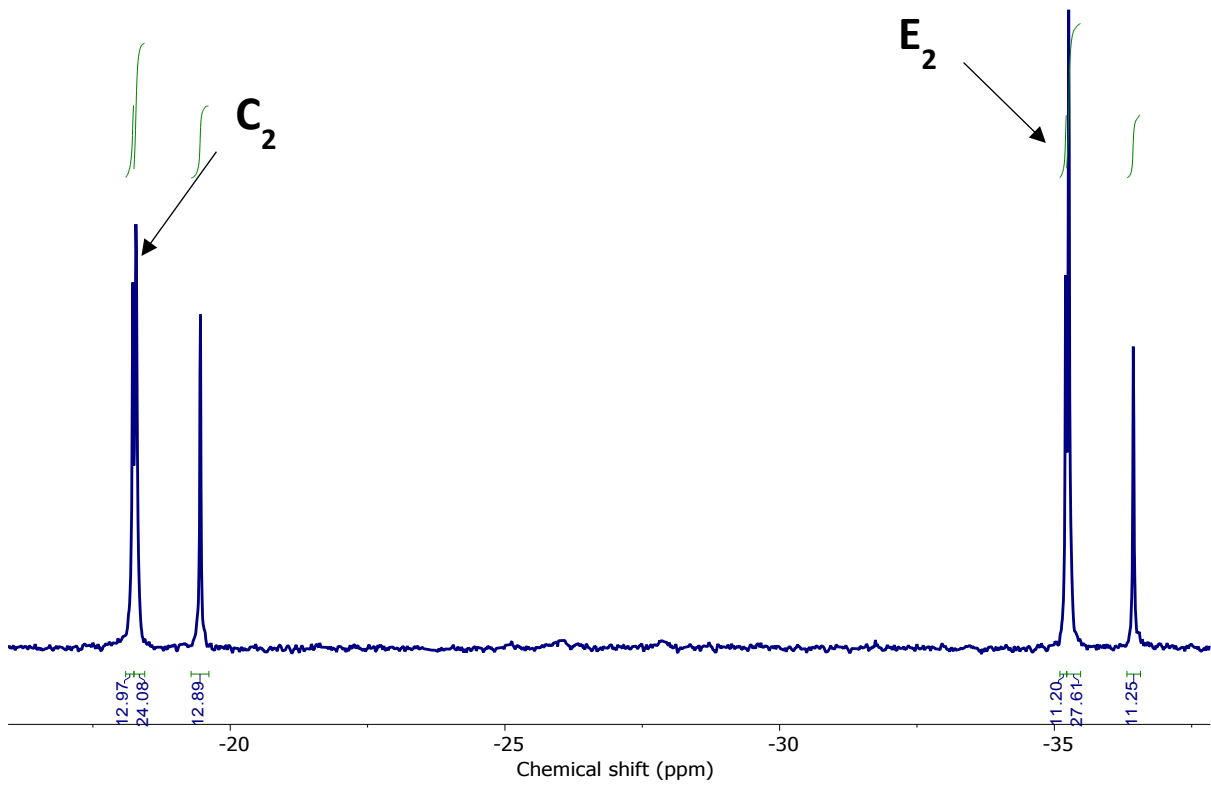

$10^a$  $D_2$  $E_2$ pp/cb37705 cb088(1)B  
single pulse decoupled gated NOE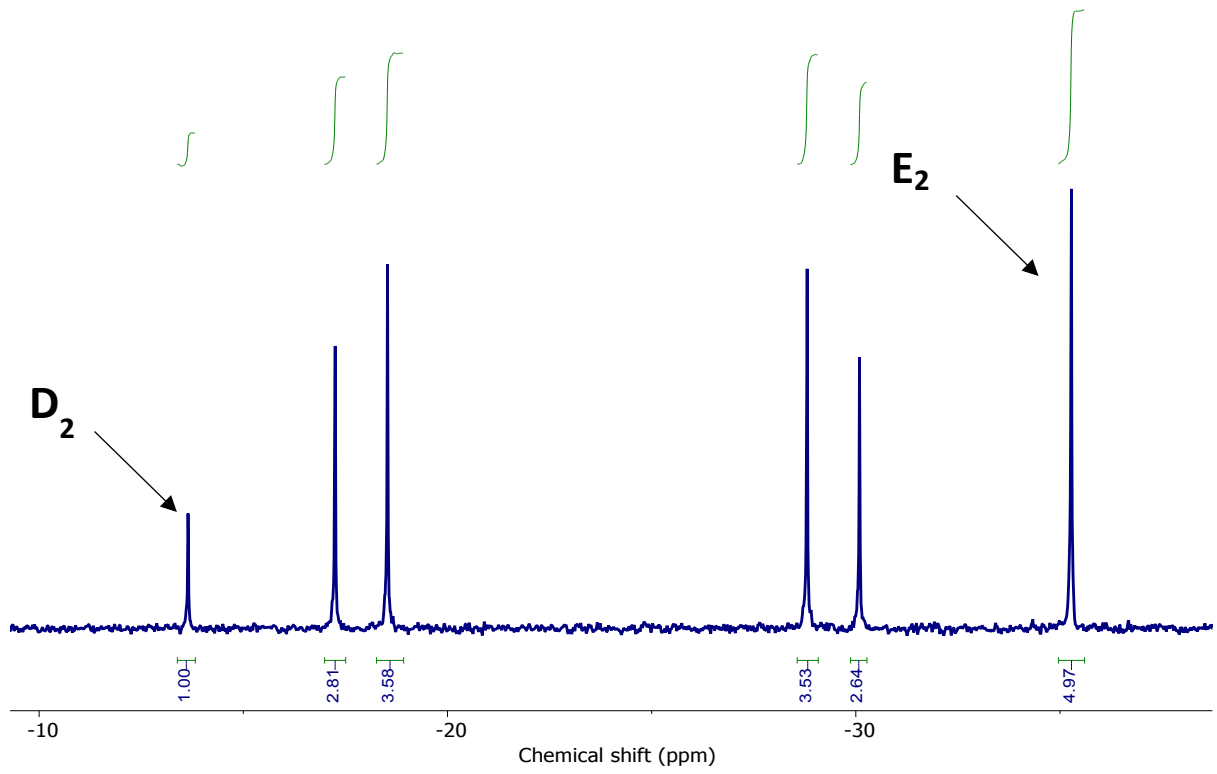



### 3 – Qualitative kinetics studies

#### 3.1 – Kinetics of $A_2 + E_2$

##### Experimental procedure for $A_2/E_2$ kinetics investigation.

To an oven-dried NMR tube,  $A_2$  (10 mg, 0.025 mmol) and  $E_2$  (11.5 mg, 0.025 mmol) were added under an Ar atmosphere. The NMR tube was then sealed, removed from the glovebox and cycled onto a Schlenk line. Then, under a dry  $N_2$  atmosphere 0.5 ml of solvent ( $CDCl_3$  or toluene) was added and the diphosphanes dissolved. In the  $CDCl_3$  case, the reaction mixture was immediately cooled to  $-78\text{ }^\circ\text{C}$  using a dry ice/acetone bath. The toluene reaction was left at ambient temperature\* and remained unchanged for a period of 3–4 days. The cooled  $CDCl_3$  sample was then loaded into a JEOL ECS300 spectrometer, allowed to warm to ambient. A 64 scan  $^{31}\text{P}\{^1\text{H}\}$  NMR spectrum was then recorded at 10 min intervals for 12 h, using inverse-gated decoupling.

\*In a subsequent experiment no metathesis was observed in the toluene reaction even when heated to  $100\text{ }^\circ\text{C}$  for 24 h.

The following graphs show the lack of fit of the kinetics data for diphosphane metathesis and conventional ( $0^{\text{th}}$ ,  $\frac{1}{2}$ ,  $1^{\text{st}}$  and  $2^{\text{nd}}$ -order) kinetics, both in terms of a starting material  $A_2$  and the product  $AE$ .

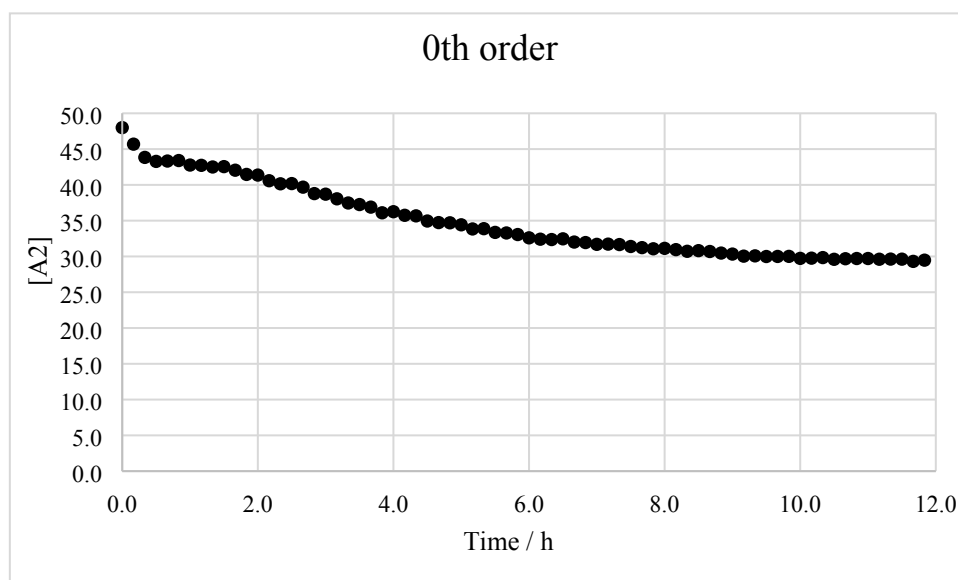

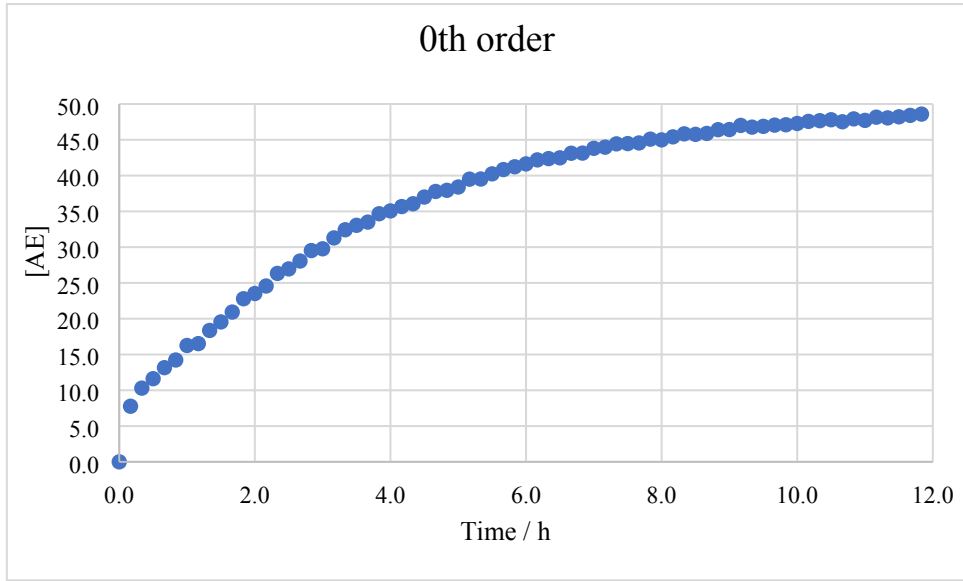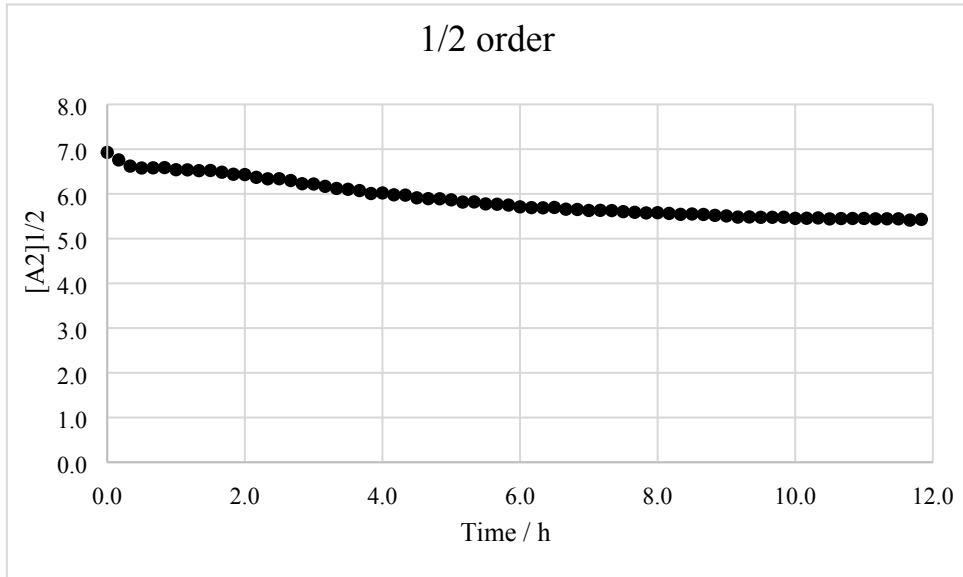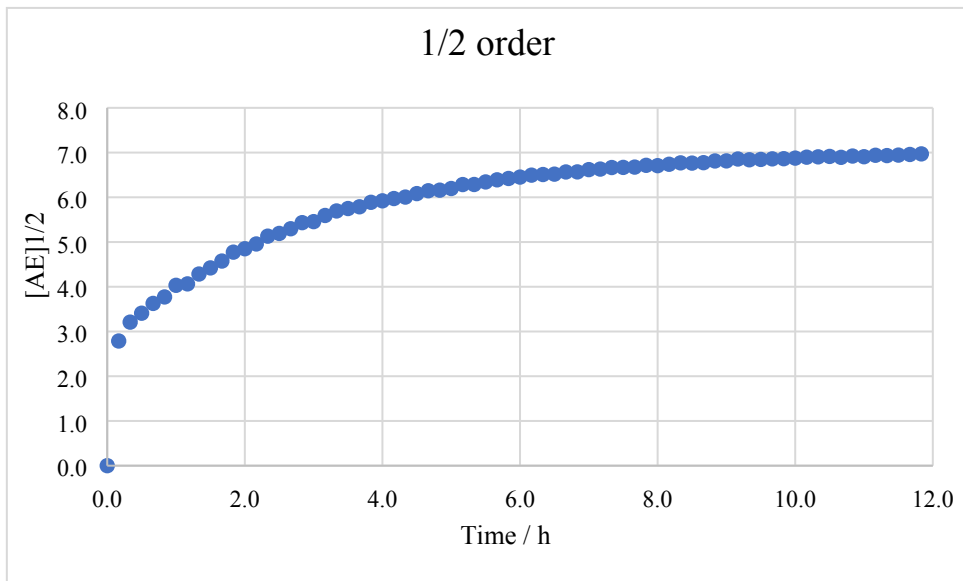

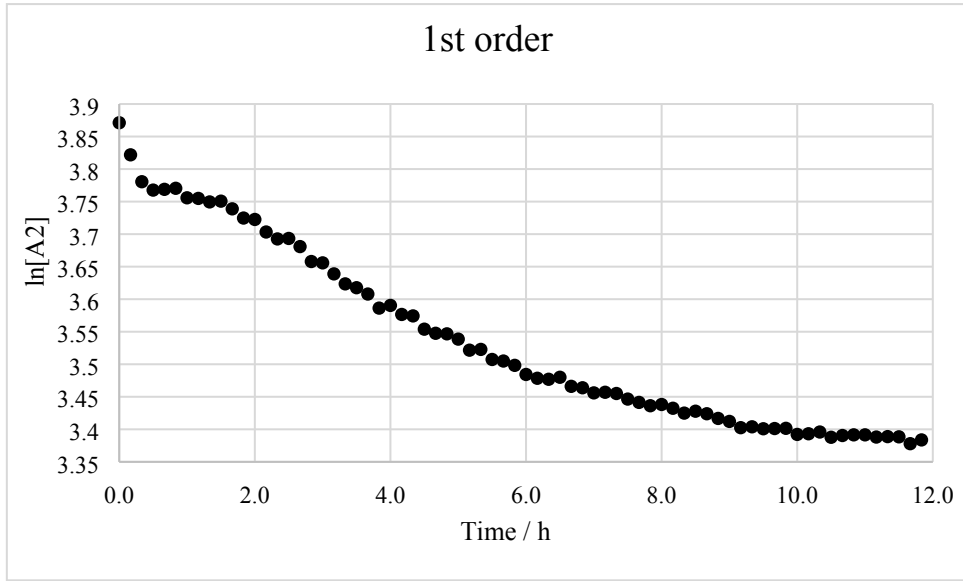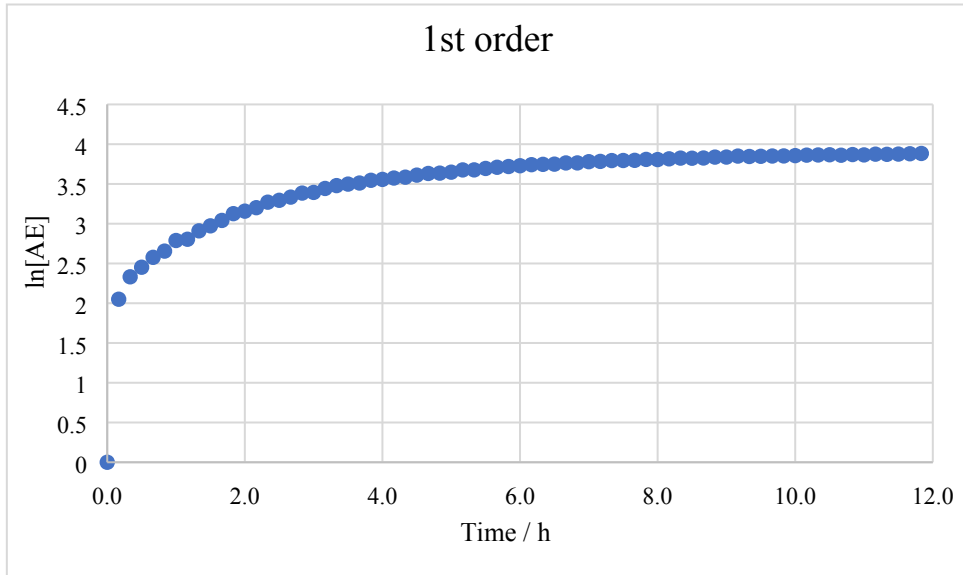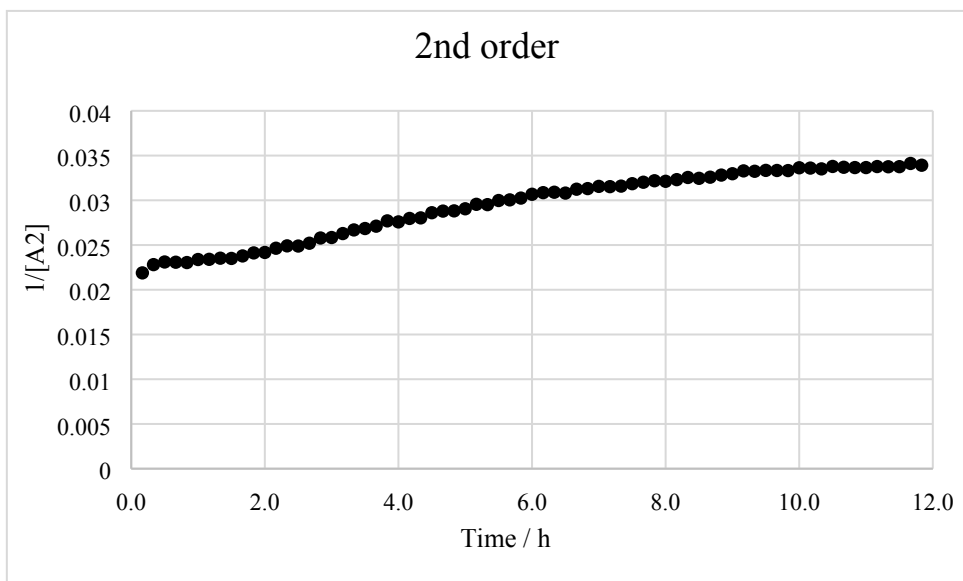

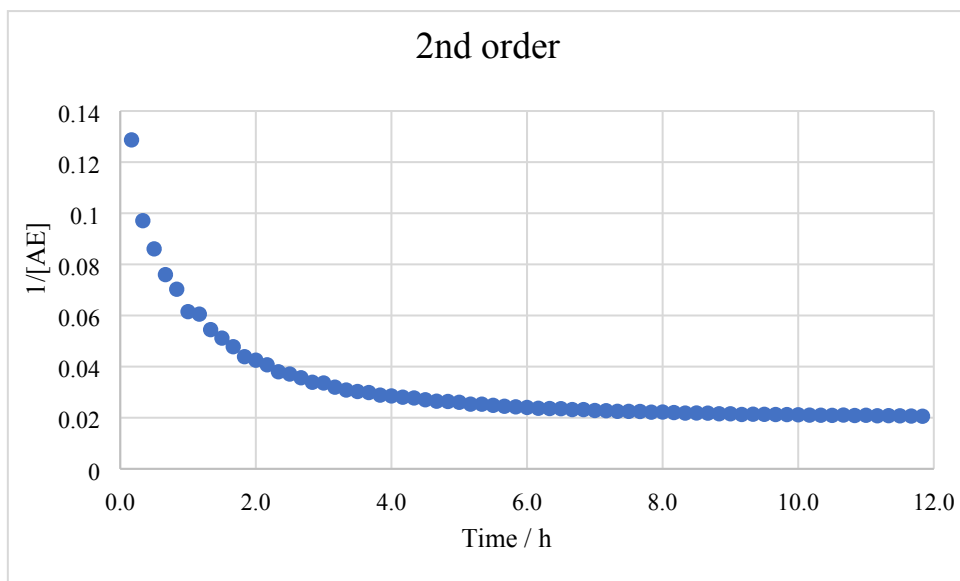

### 3.2 – Kinetics of reverse AE metathesis

*The following plots show the kinetic fits of the reverse reaction, starting with pure AE (10 mg, in 0.5 ml  $CDCl_3$ ), following an analogous procedure to the forward reaction.*

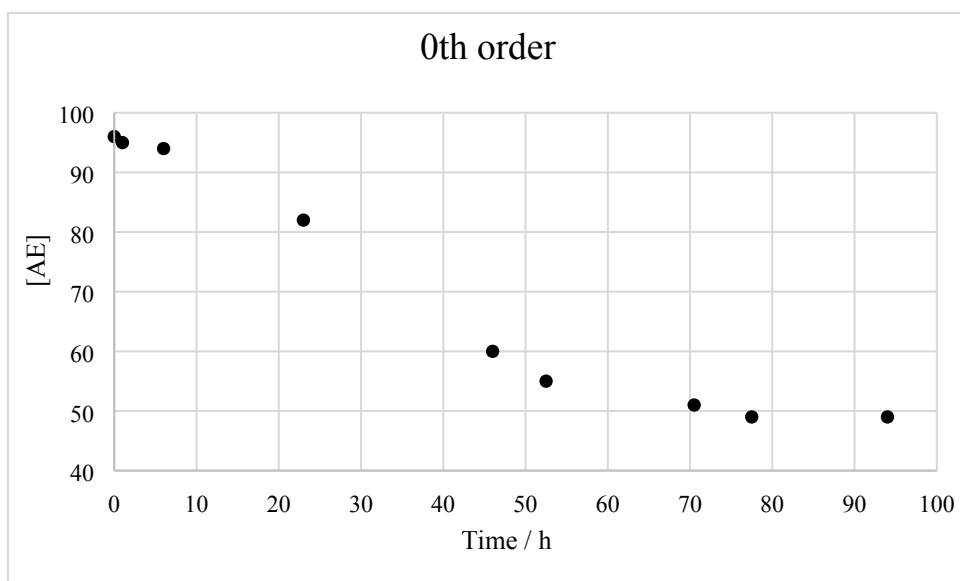

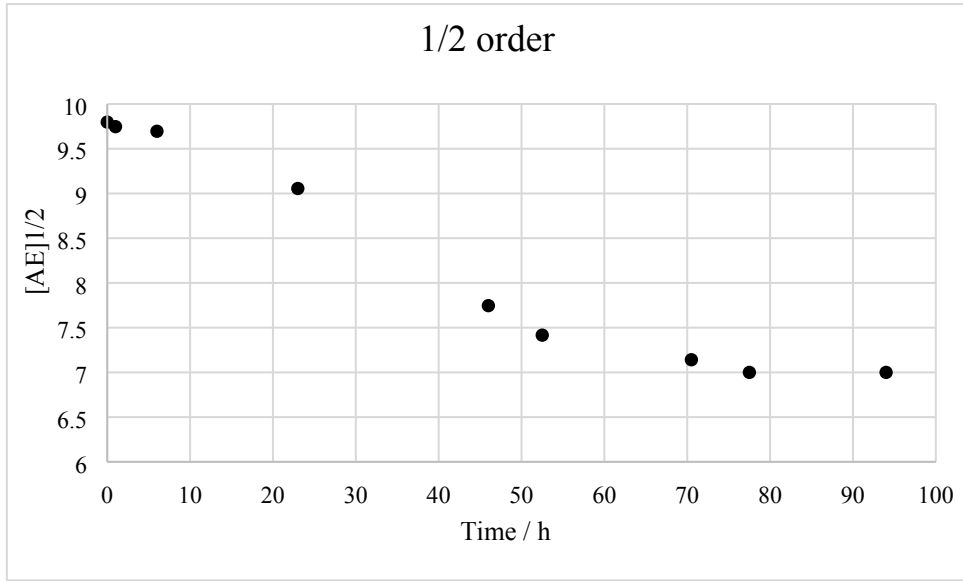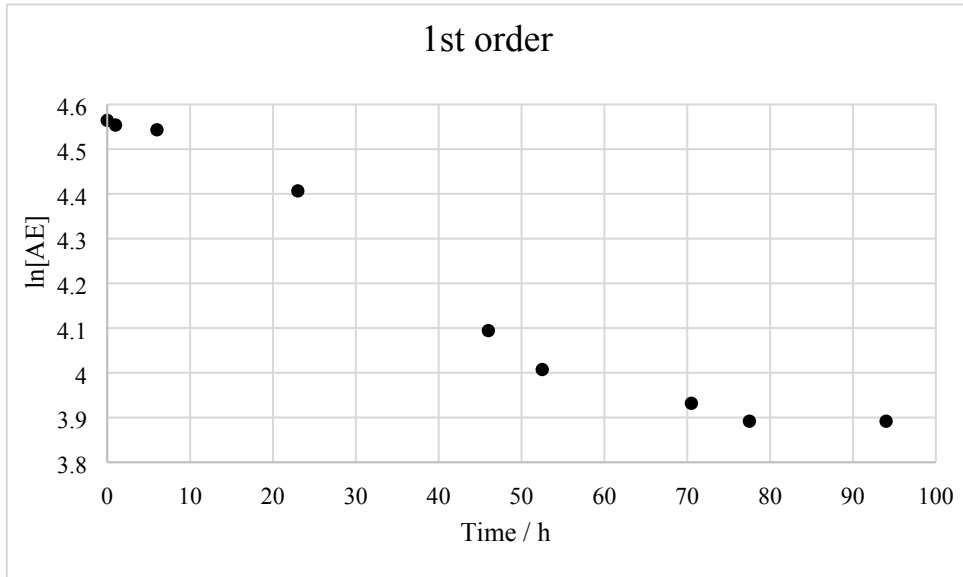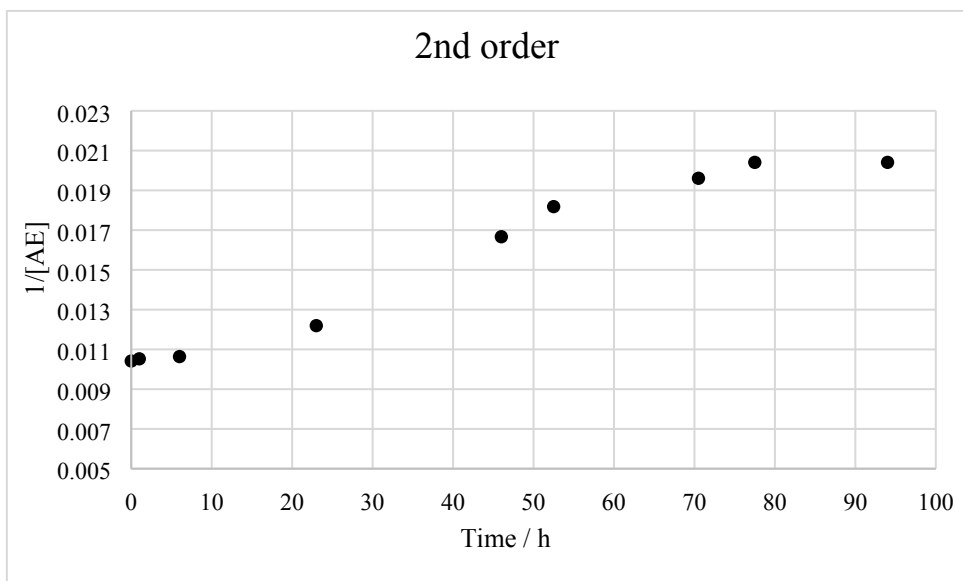

3.3 – Kinetics of  $B_2 + C_2$ 

The same procedure used for the **AE** reactions was used in monitoring the kinetics of **BC** formation, though instead of warming the NMR tubes from  $-78\text{ }^\circ\text{C}$  to room temperature, in this experiment the NMR tube was only warmed to  $-20\text{ }^\circ\text{C}$ , where it was held for the duration of the experiment.

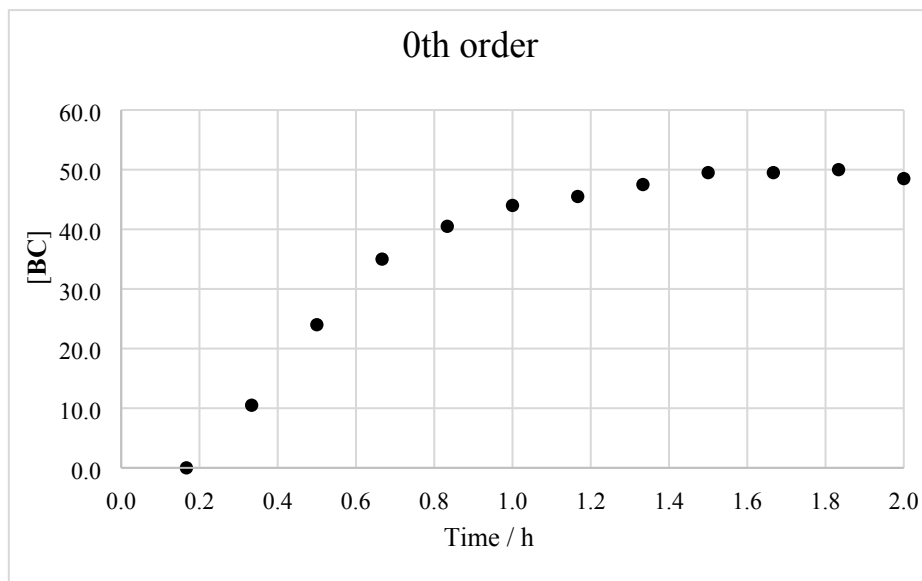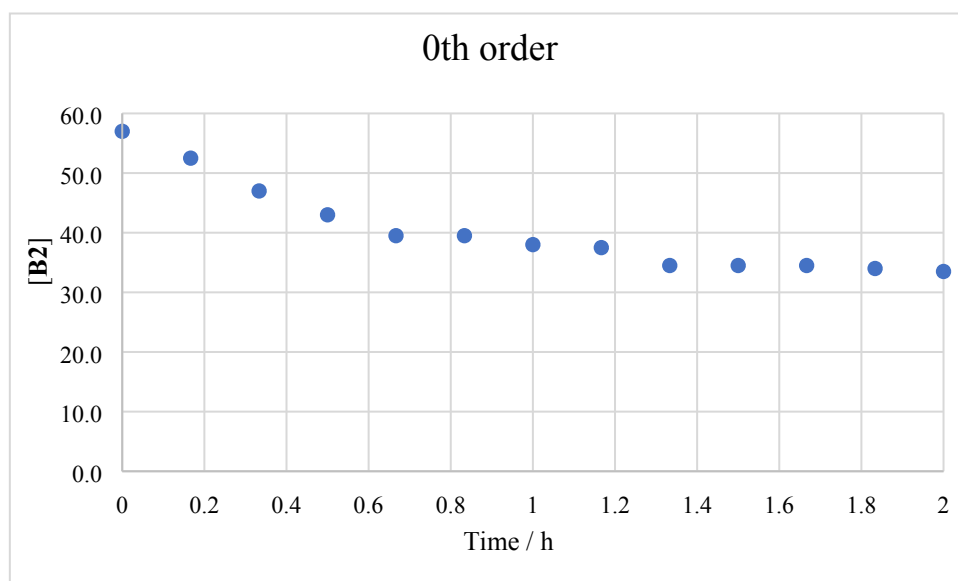

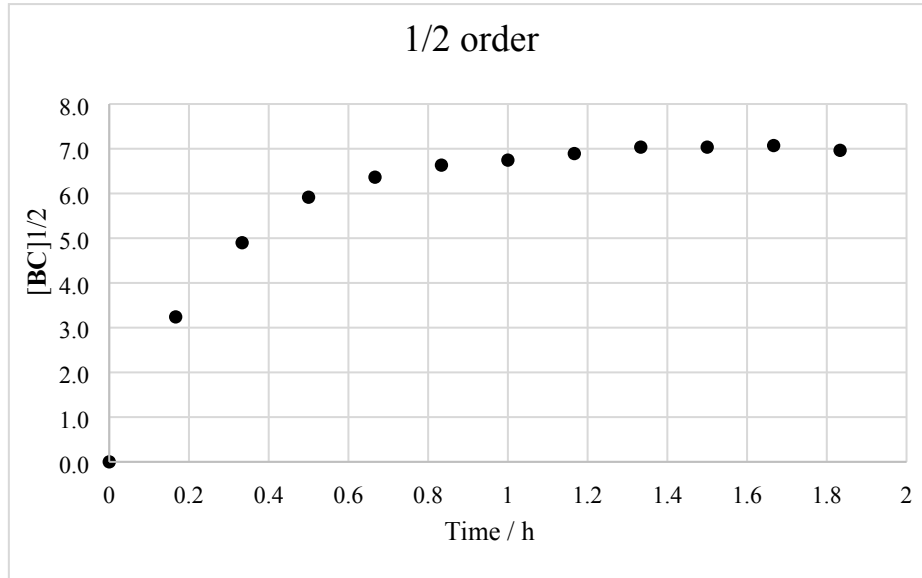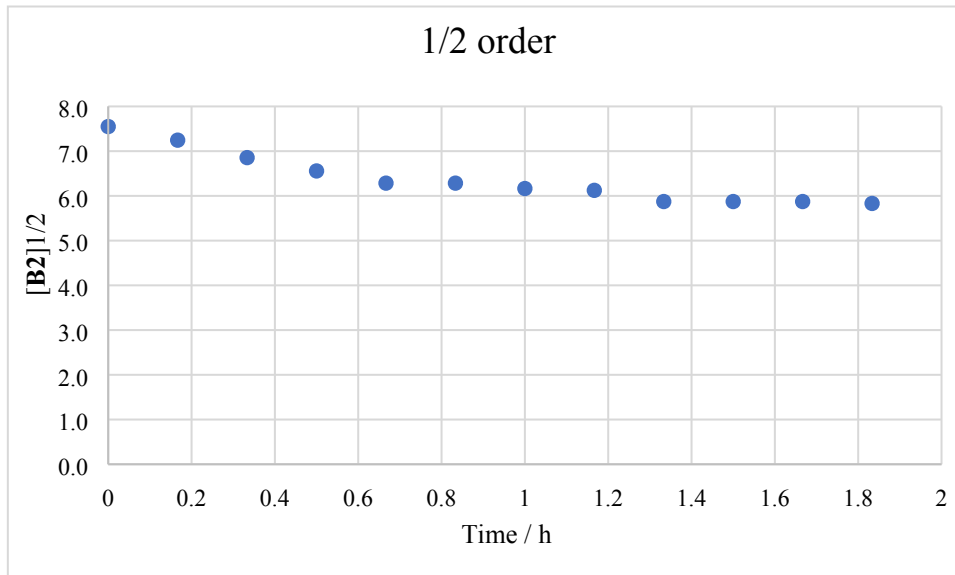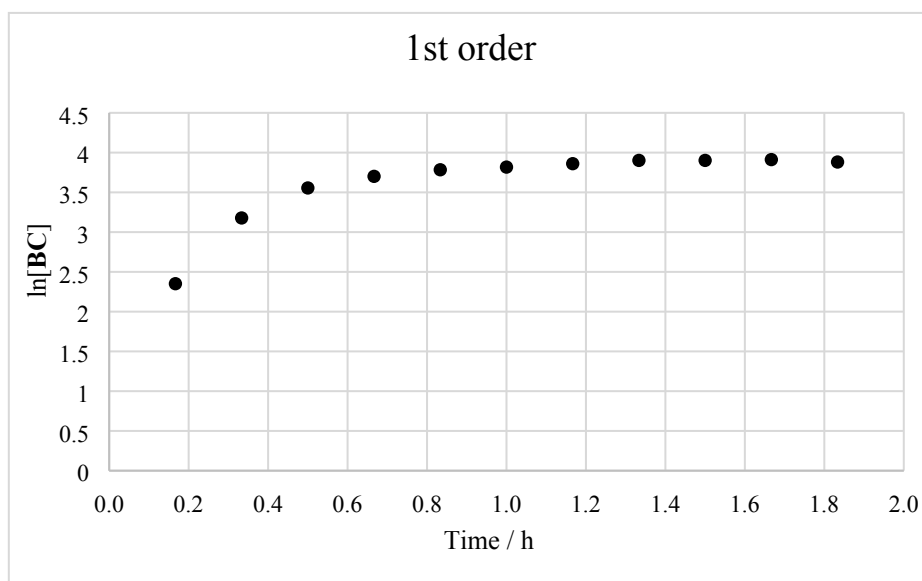

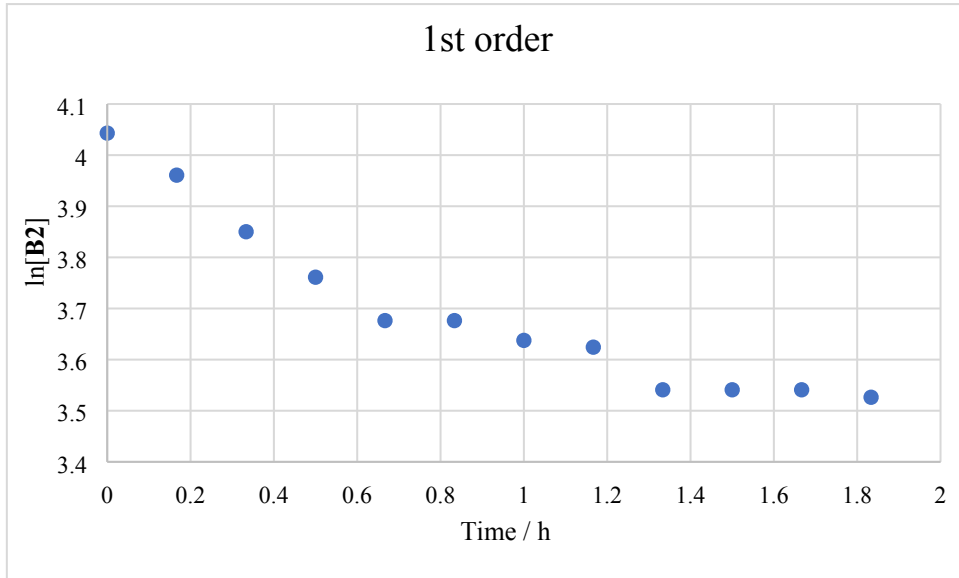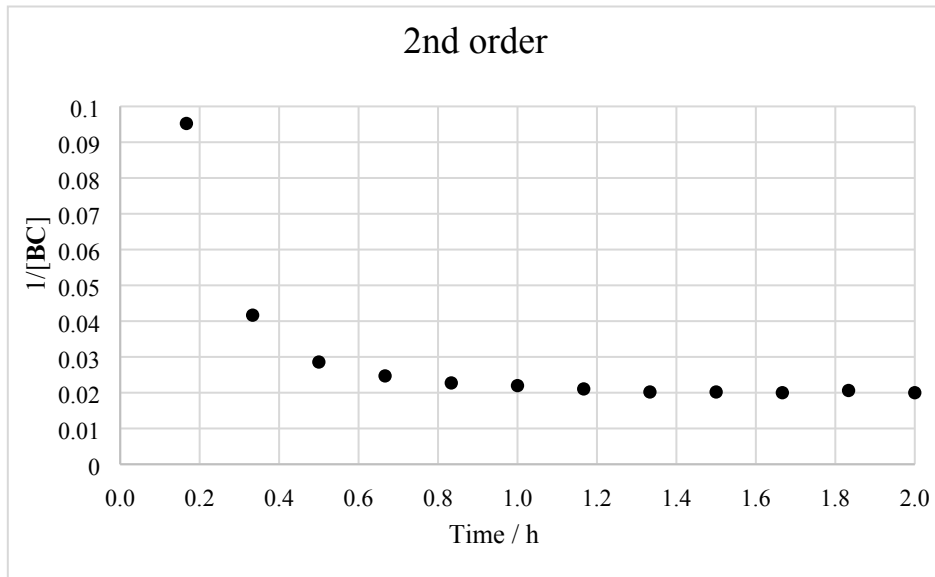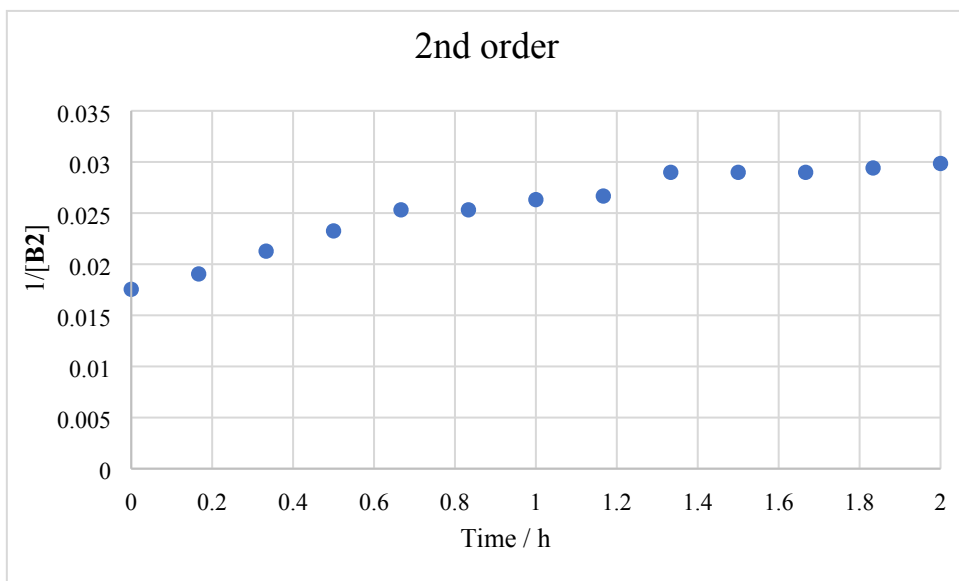



#### 4 –<sup>31</sup>P NMR spectra for mechanistic investigations

##### **General procedure for additional mechanistic reactions.**

Reactions involving additive inhibitors (e.g. water, <sup>i</sup>Pr<sub>2</sub>NH, TEMPO) or other non-diphosphane metathesis partners (e.g. Ar<sub>2</sub>PCl/Ar<sub>2</sub>PH) were performed analogously to the aforementioned equilibrium studies via the following procedure.

To an oven-dried NMR tube 0.025 mmol of **X**<sub>2</sub> and 0.025–0.1 mmol of **Y**<sub>2</sub> (or Ar<sub>2</sub>PCl/Ar<sub>2</sub>PH) was added under an Ar atmosphere. A 1:1 stoichiometric balance was used unless otherwise stated. At this stage, any solid additives (e.g. TEMPO, TTBP) were added in excess (0.1–0.2 mmol). The NMR tube was then sealed, removed from the glovebox and cycled onto a Schlenk line under a dry N<sub>2</sub> atmosphere. At this stage, any liquid additives (e.g. H<sub>2</sub>O) were syringed into the NMR tube prior to the addition of 0.5 ml of dry, degassed solvent (CDCl<sub>3</sub>, CD<sub>2</sub>Cl<sub>2</sub>, C<sub>6</sub>D<sub>6</sub>, PhMe, PhCl, PhF or THF). The NMR tube was then re-sealed with a parafilm wrap around the cap to prevent the ingress of air into the tube. Generally, a <sup>31</sup>P{<sup>1</sup>H} NMR spectrum was recorded within 20 min of solvent addition.

In experiments with **AE**, the same procedure was followed without the addition of a second diphosphane.

In photolysis experiments, the NMR tube was illuminated with a 5 W, 365 nm handheld UV lamp. Control experiments were wrapped in aluminium foil and placed in a dark cupboard.

In sonication experiments a modified procedure was employed:

To an oven-dried Schlenk tube equipped with a magnetic stirrer, **A**<sub>2</sub> (93 mg, 0.25 mmol) and **E**<sub>2</sub> (107 mg, 0.25 mmol) were added under an Ar atmosphere. The Schlenk tube was removed from the glovebox and cycled onto a Schlenk line under an N<sub>2</sub> atmosphere. To the Schlenk, 5 ml of solvent (CH<sub>2</sub>Cl<sub>2</sub>, CHCl<sub>3</sub>, THF or PhMe) was added and the diphosphanes were stirred until dissolution. Immediately thereafter the reaction mixture was syringed into a custom-built Suslick vessel (previously cycled onto the Schlenk line) whilst under a positive pressure of N<sub>2</sub>. The Suslick vessel was then sealed and sonicated under pulse sonication mode (1 s on, 1 s off) at 20 kHz at 0 °C for 9 h. 0.5 ml aliquots of the reaction mixture were then removed from the reaction mixture at regular intervals into oven-dried tubes for <sup>31</sup>P{<sup>1</sup>H} NMR examination.

4.1 – Metathesis reactions not involving E<sub>2</sub>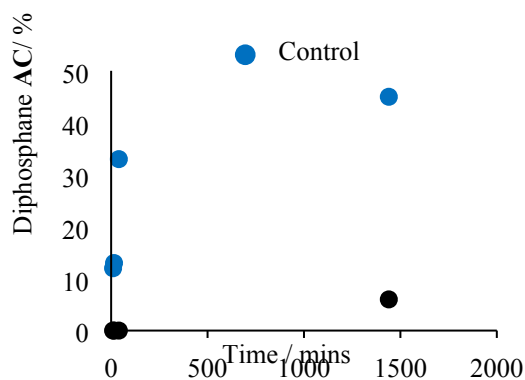

**ESI 4.1.1.** The metathesis reaction of tetraphenyldiphosphane (**A**<sub>2</sub>) and tetra(*p*-anisyl)diphosphane (**C**<sub>2</sub>) at -20 °C, with and without 5 equivalents of TEMPO (percentages determined by <sup>31</sup>P{<sup>1</sup>H} NMR integration). After 1 h (the 3<sup>rd</sup> data point) the temperature was allowed to warm to ambient.

24 h, CDCl<sub>3</sub> w/ xs TEMPO

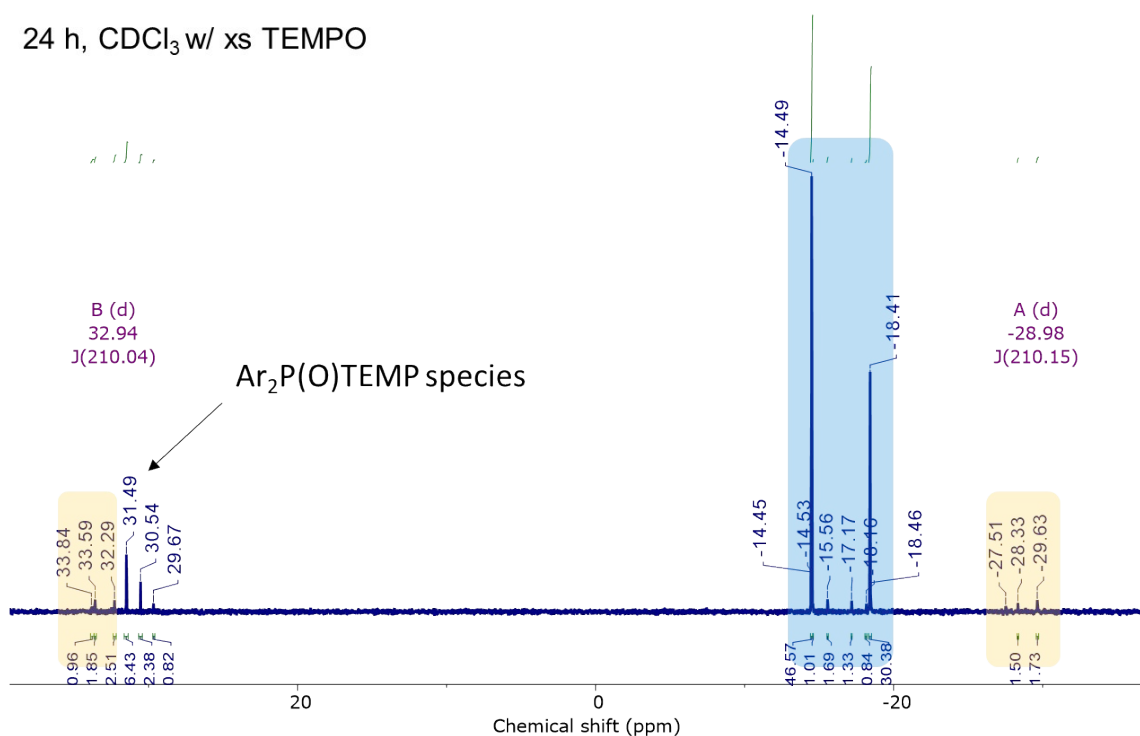

**ESI 4.1.2.** TEMPO inhibition of the **A**<sub>2</sub>/**C**<sub>2</sub> metathesis. Diphosphanes are highlighted in blue and oxides in yellow. The resonances at +30.54 and +31.49 are attributed to diphenylphosphino-TEMPO and di(*p*-anisyl)phosphino-TEMPO adducts respectively.

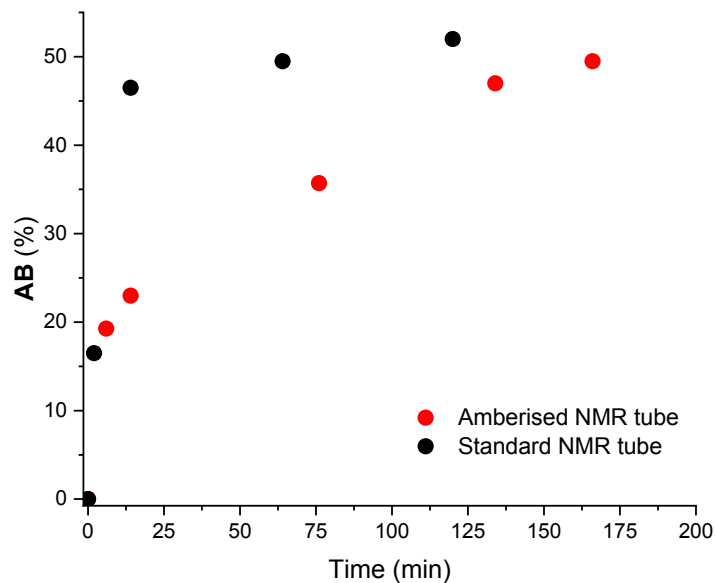

**ESI 4.1.3.** Amberised NMR-tube inhibition of  $A_2/B_2$  metathesis.

#### 4.2 – Metathesis reactions involving AE or $E_2$

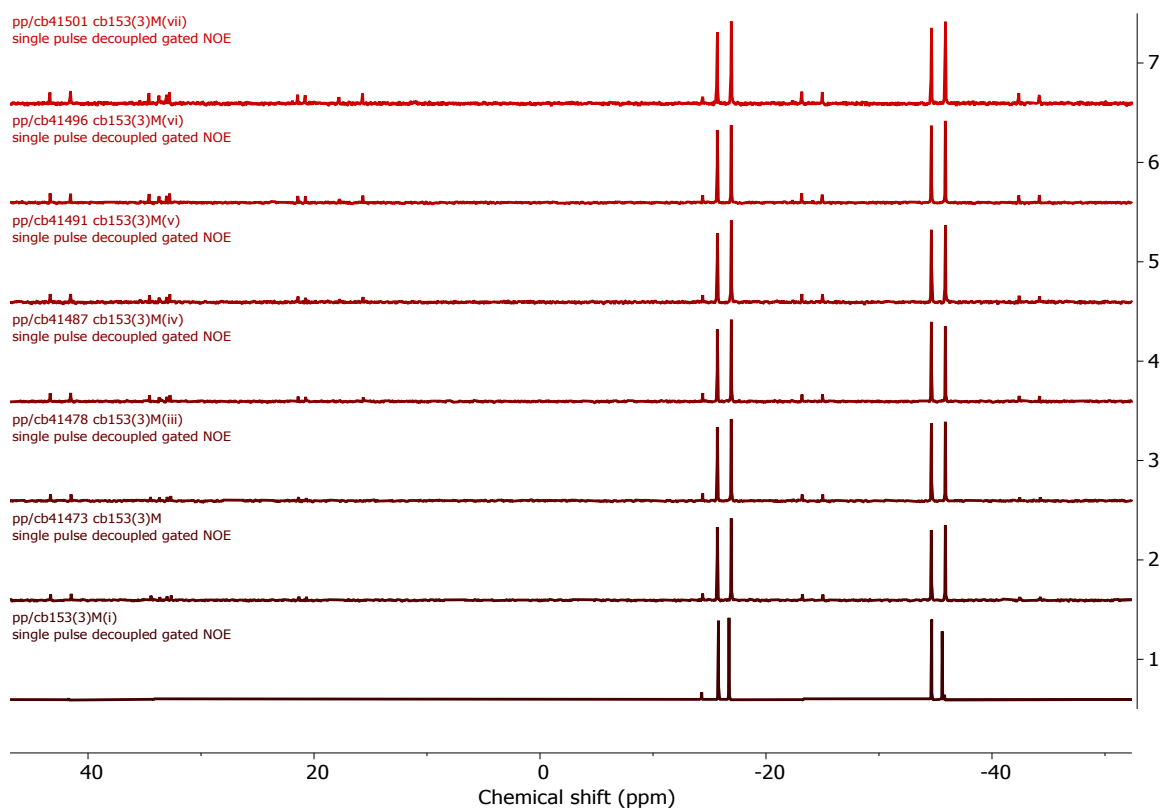

**ESI 4.2.1.** Pure diphosphane **AE** in benzene- $d_6$ . 1 – 1.5 h, 2 – 18.5 h, 3 – 24.5 h, 4 – 42.5 h, 5 – 49.5 h, 6 – 66 h, 7 – 71.5 h. The small doublet resonances correspond to  $R_2P(O)PR'_2$  species.

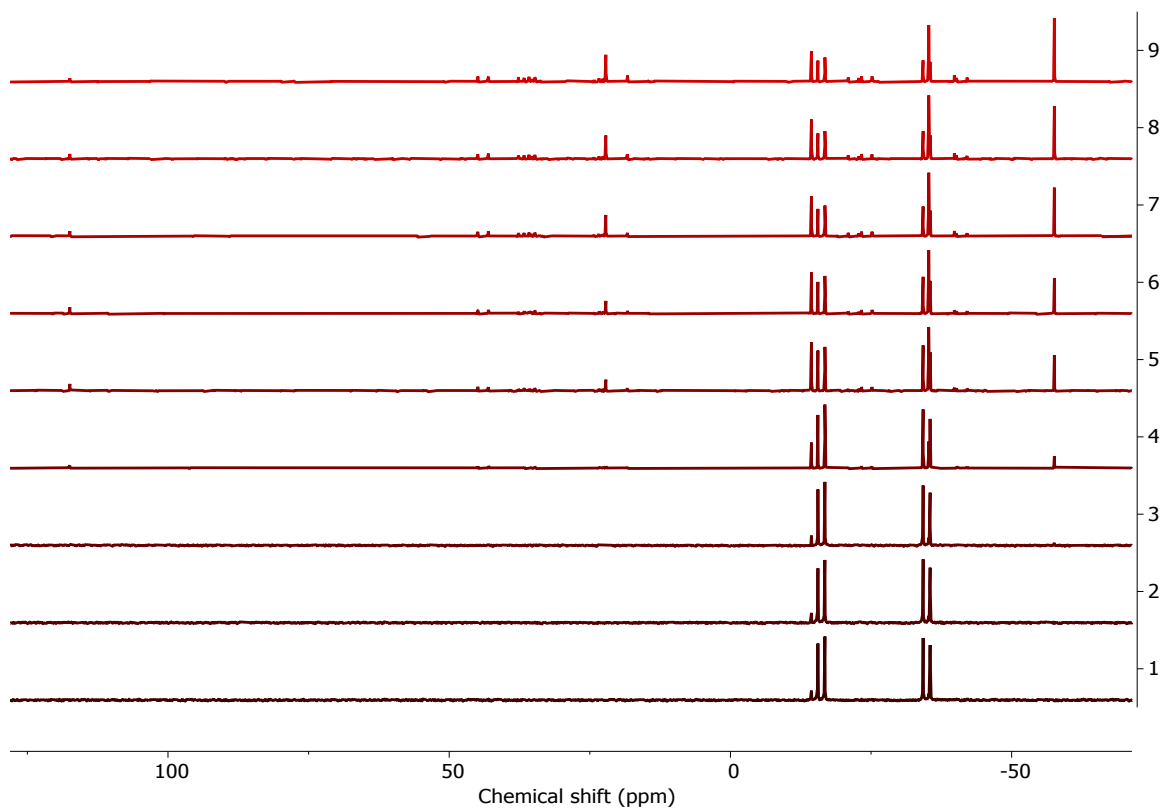

**ESI 4.2.2.** Reverse metathesis of AE (10 mg) in CDCl<sub>3</sub> (0.5 ml). The resonance at ca. -15 ppm corresponds to **A**<sub>2</sub> and the resonance at ca. -35 ppm corresponds to **E**<sub>2</sub>. Formation of oTol<sub>2</sub>PH is observable at ca. -60 ppm. 1 – 0 h, 2 – 1 h, 3 – 6 h, 4 – 23 h, 5 – 46 h, 6 – 52.5 h, 7 – 70.5 h, 8 – 77.5 h, 9 – 94 h.

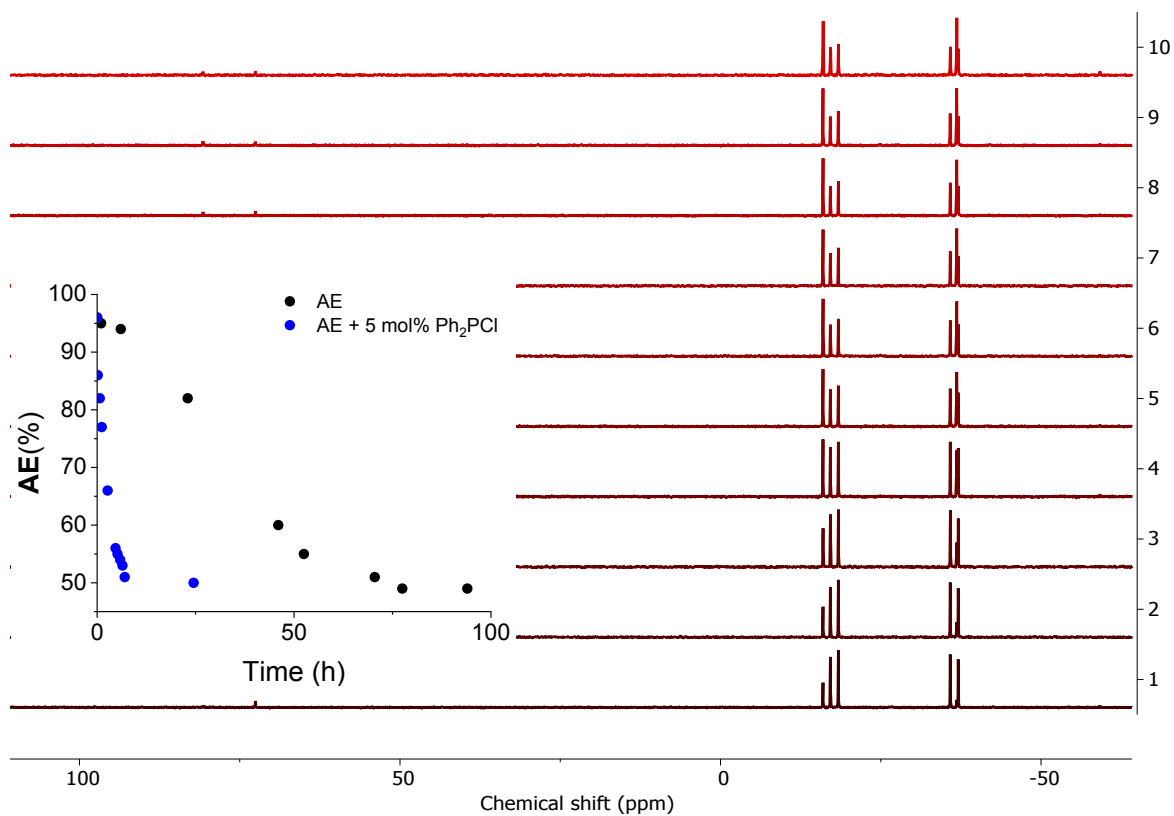

**ESI 4.2.3.** Reverse metathesis of AE (10 mg) in CDCl<sub>3</sub> (0.5 ml) catalysed with 5 mol% of Ph<sub>2</sub>PCI. 1 – 10 min, 2 – 40 min, 3 – 70 min, 4 – 160 min, 5 – 280 min, 6 – 310 min, 7 – 350 min, 8 – 385 min, 9 – 420 min, 10 – 1470 min.

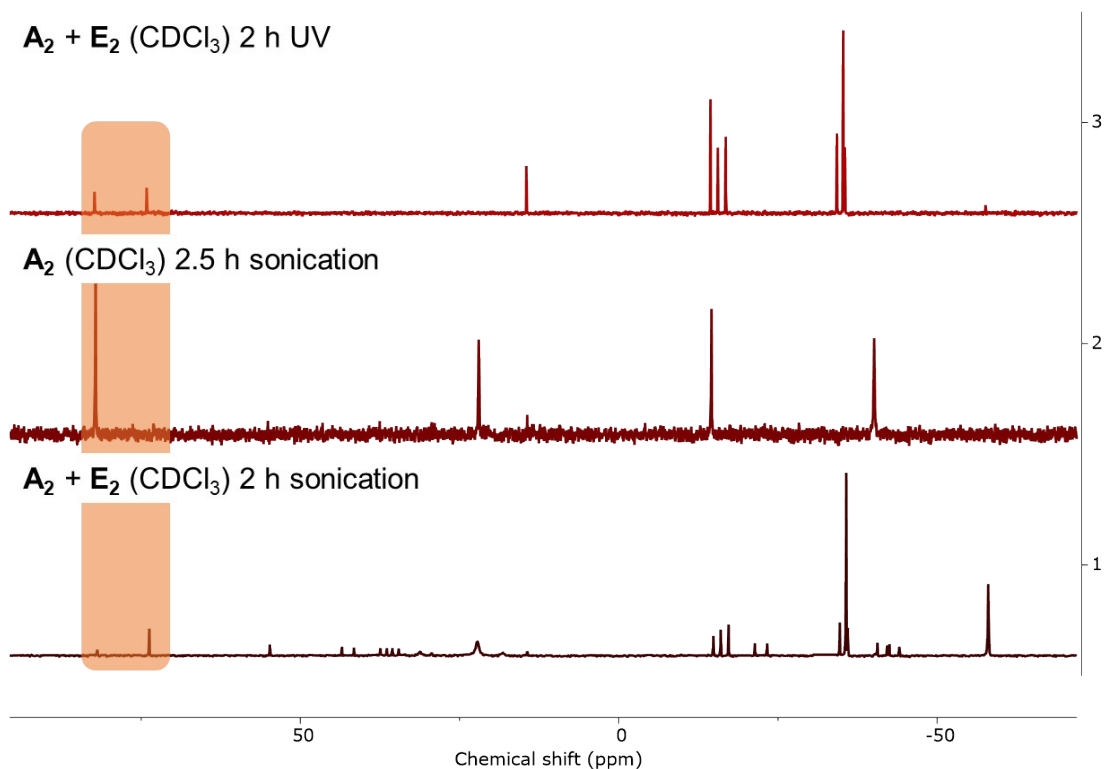

ESI 4.2.4. 1 – AE metathesis in  $CDCl_3$ , 2 –  $A_2$  sonolysis in  $CDCl_3$ , and 3 – UV photolysis during AE metathesis. Chlorophosphine resonances are highlighted in orange.

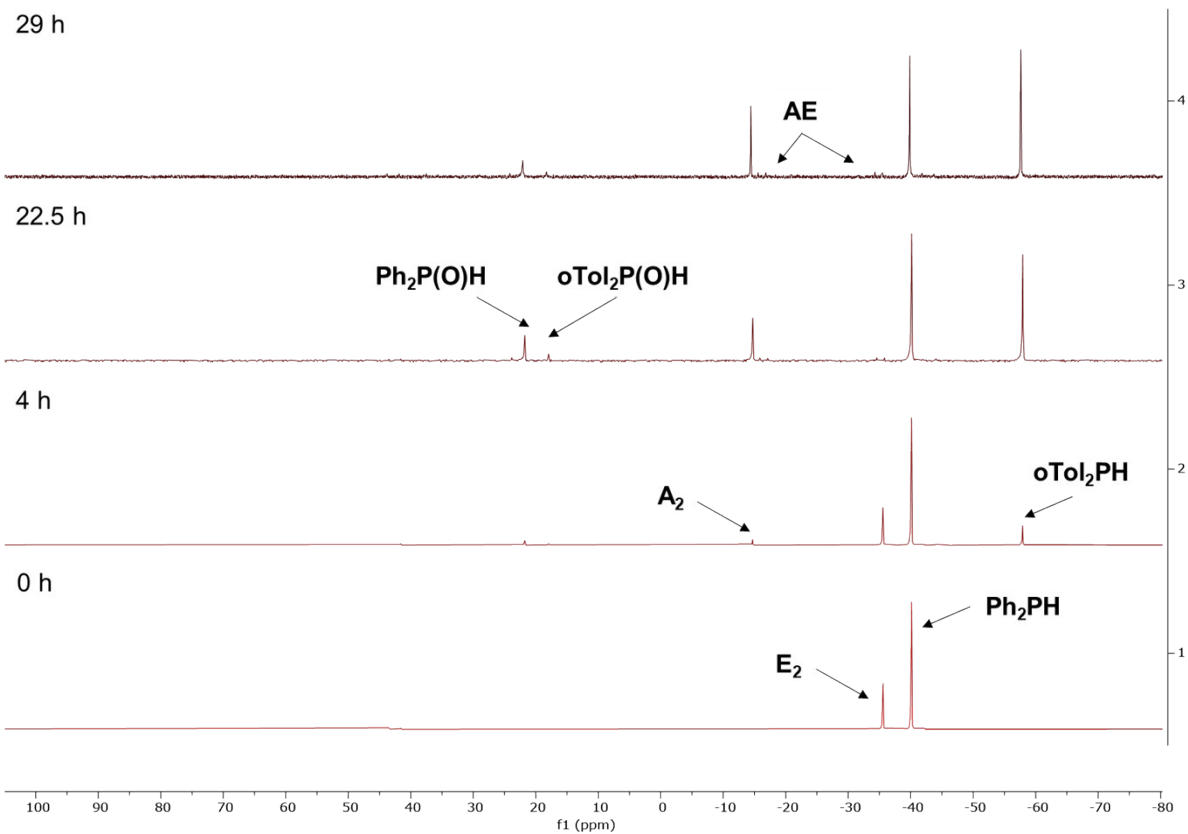

ESI 4.2.5. The reaction between  $E_2$  and  $Ph_2PH$  in  $CDCl_3$ .

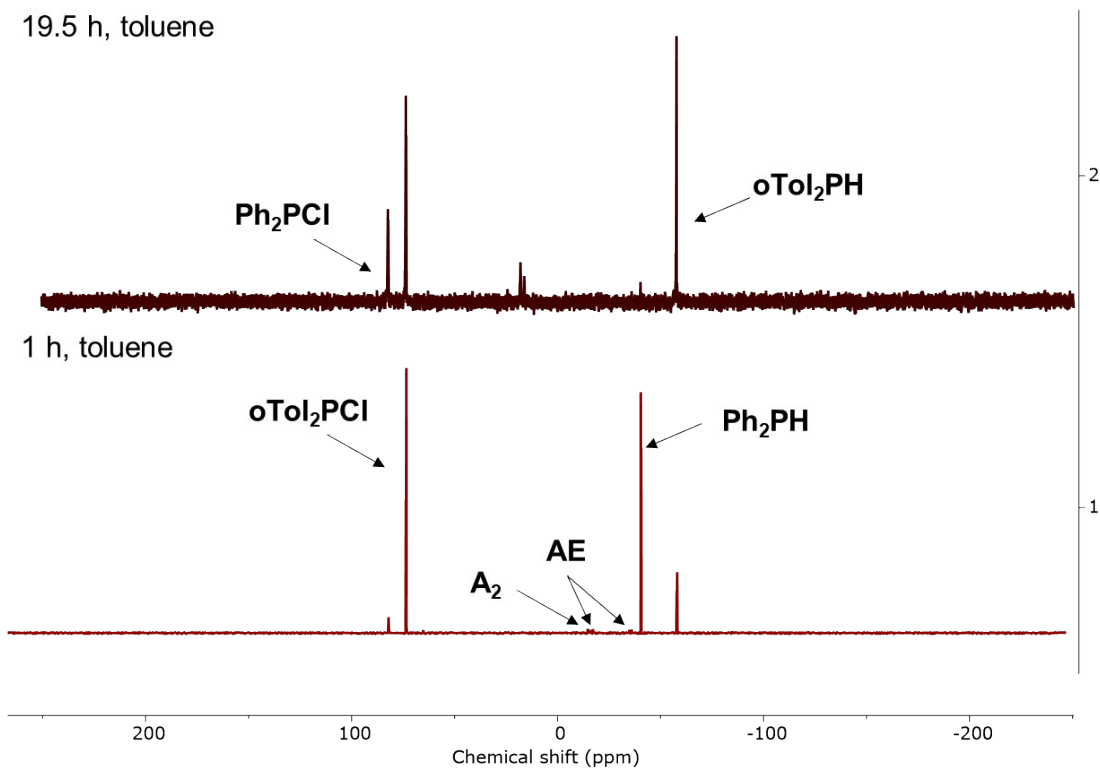

ESI 4.2.6. The reaction between  $o\text{Tol}_2\text{PCI}$  and  $\text{Ph}_2\text{PH}$  in toluene.

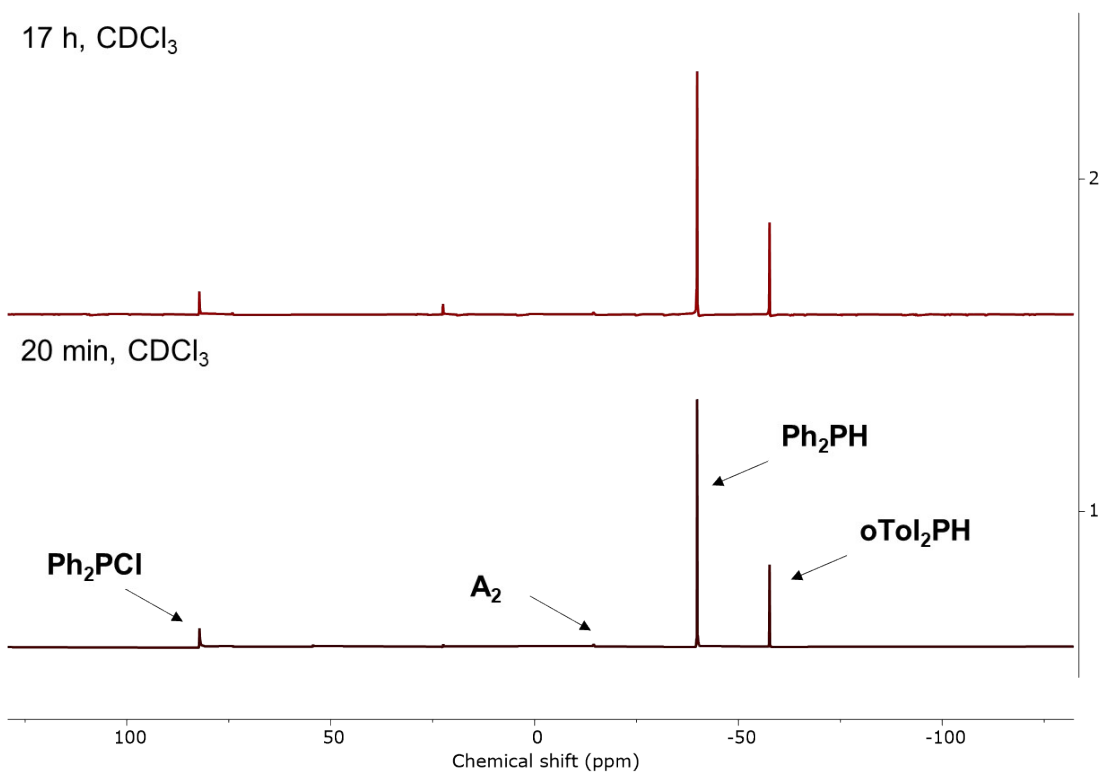

ESI 4.2.7. The reaction between  $o\text{Tol}_2\text{PCI}$  and  $\text{Ph}_2\text{PH}$  (ca. 3-fold excess) in  $\text{CDCl}_3$ . Note the immediate consumption of the starting chlorophosphine via H/Cl exchange. A trace resonance of  $\text{A}_2$  is observed here as it is in toluene.

15 min,  $\text{CHCl}_3$ 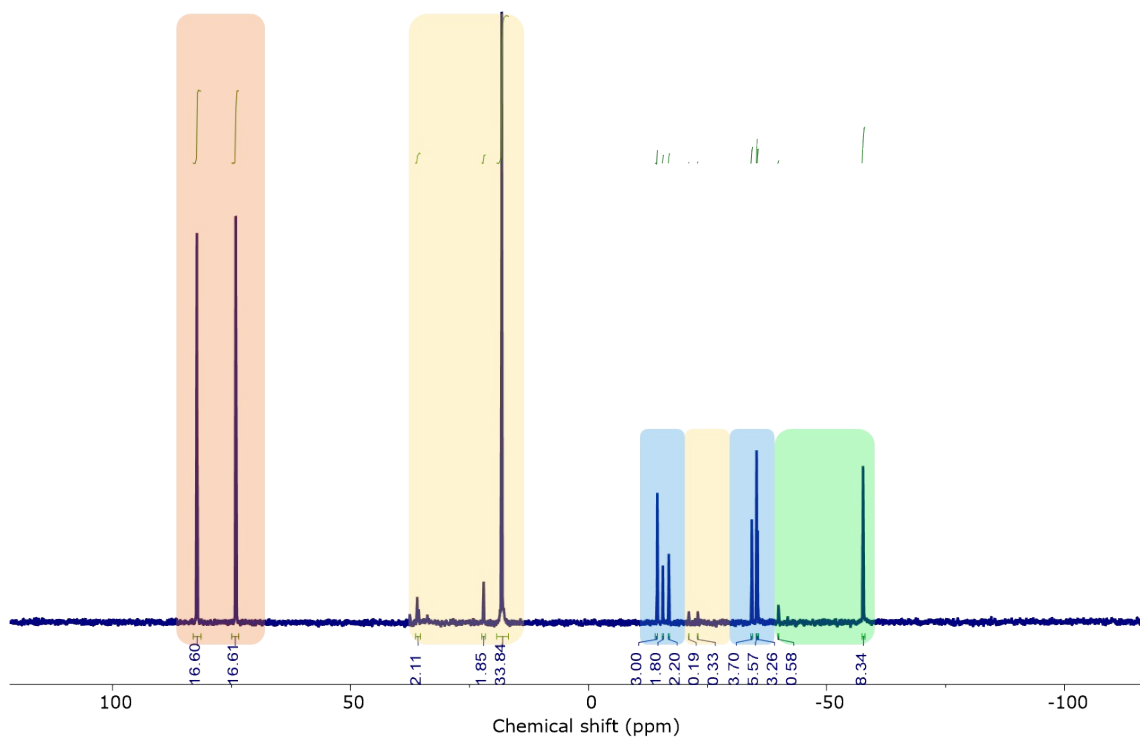

ESI 4.2.8. The reaction between  $\mathbf{A}_2$  and  $\text{oTol}_2\text{PCl}$  in chloroform. Chlorophosphines are highlighted in orange, oxides in yellow, diphosphanes in blue and secondary phosphines in green.

5 h, toluene

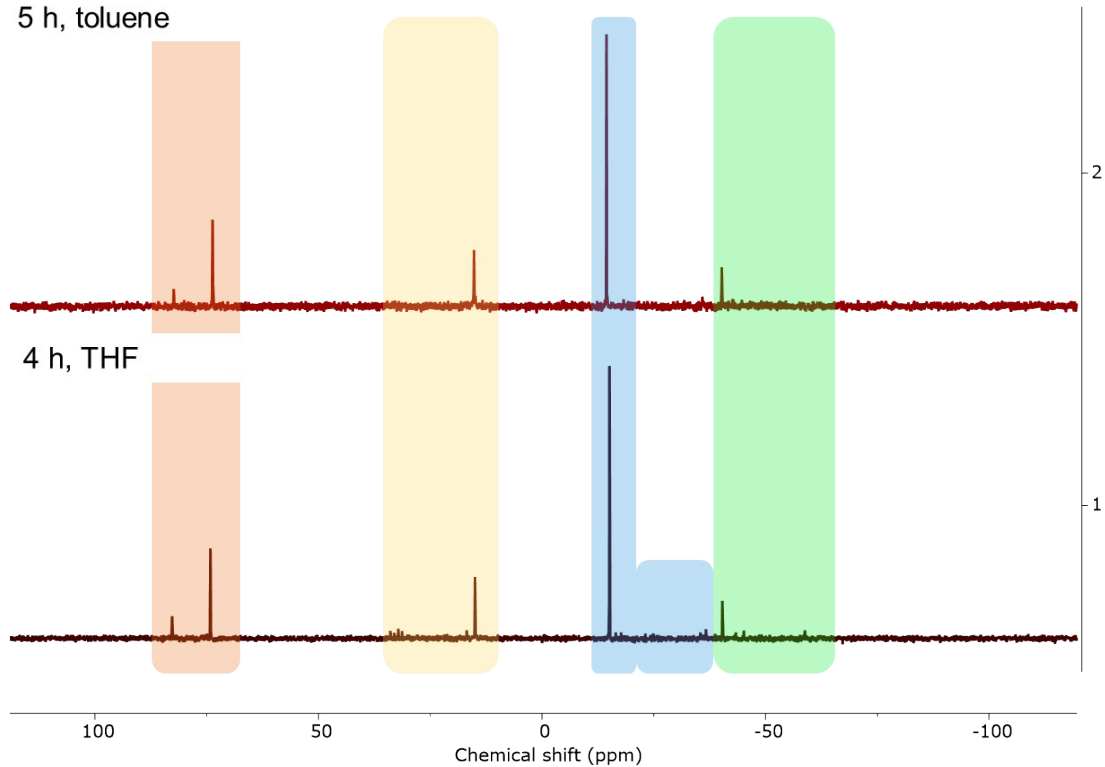

ESI 4.2.9. The reaction between  $\mathbf{A}_2$  and  $\text{oTol}_2\text{PCl}$  in THF. Chlorophosphines are highlighted in orange, oxides in yellow, diphosphanes in blue and secondary phosphines in green.



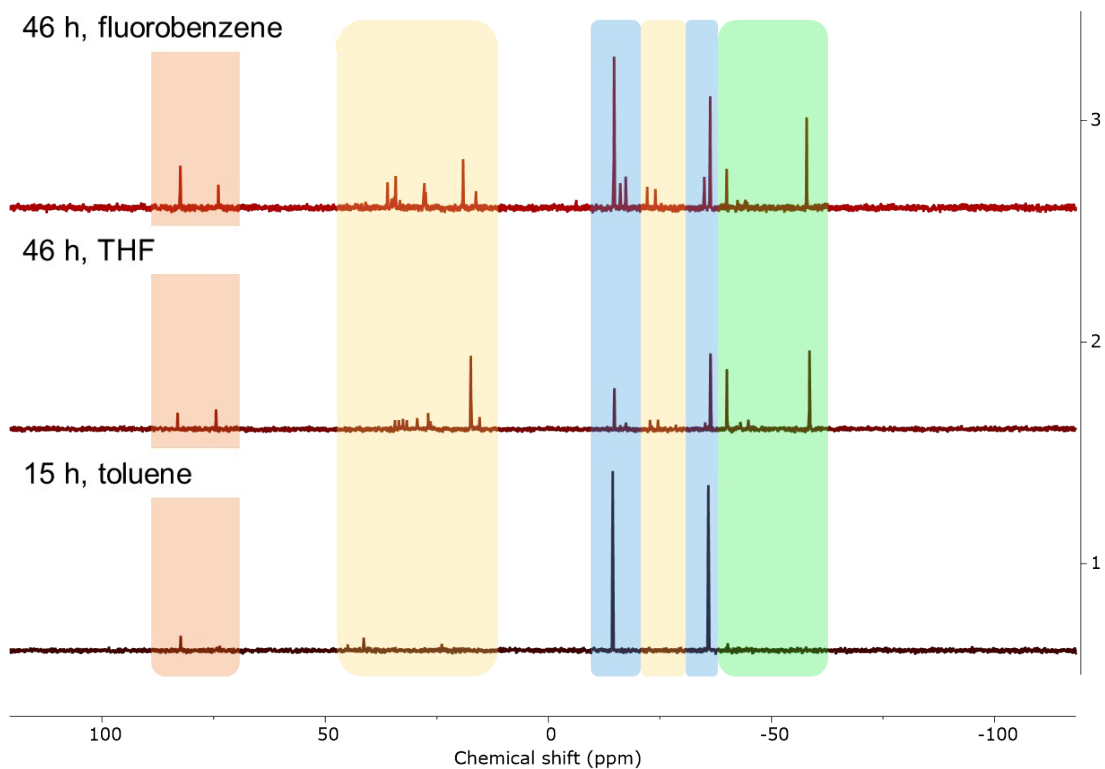

**ESI 4.2.10.** The reactions between  $A_2$  and  $E_2$  in the presence of N-chlorosuccinimide (NCS). NCS reacts with diphosphanes to produce chlorophosphines. Chlorophosphines are highlighted in orange, oxides in yellow, diphosphanes in blue and secondary phosphines in green. As with the direct reaction between  $A_2$  and  $o\text{ToI}_2\text{PCI}$ , the reaction is very slow in THF/PhF and does not proceed at all in toluene.

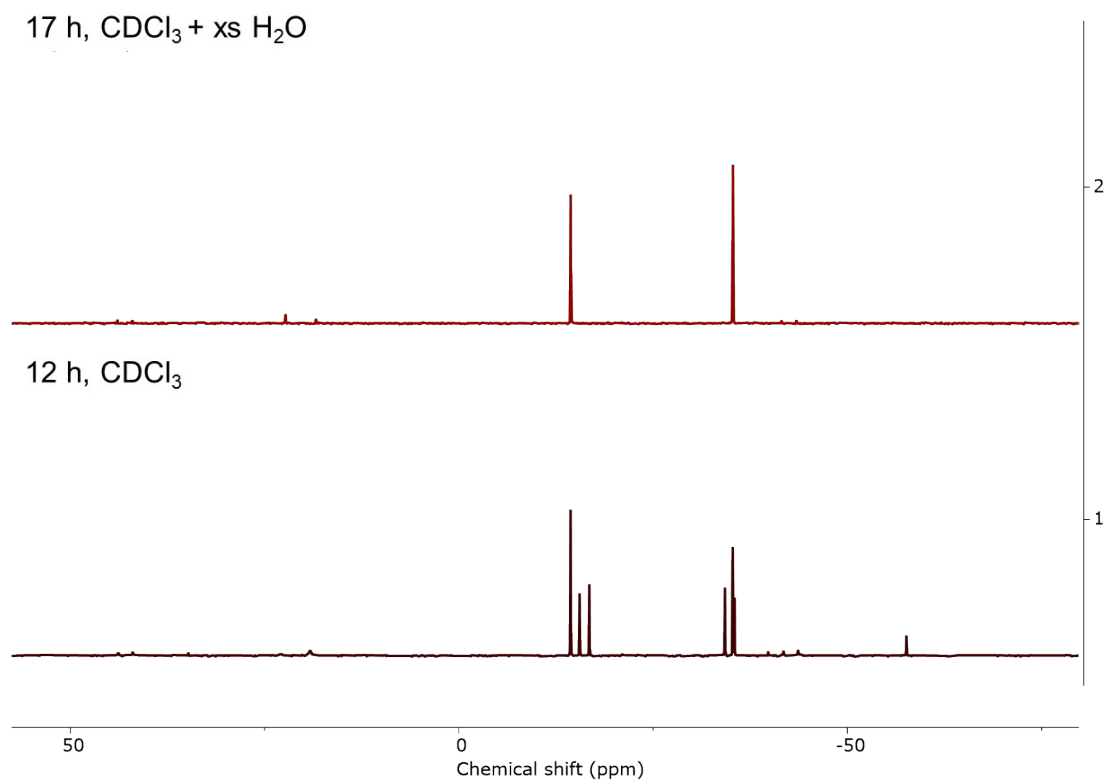

**ESI 4.2.11.** The water inhibited (top) reaction between  $A_2$  and  $E_2$  in  $CDCl_3$ . After  $\sim 40$  h, approximately 2% of the diphosphanes had reacted to form  $AE$  in the water inhibited reaction (not shown).

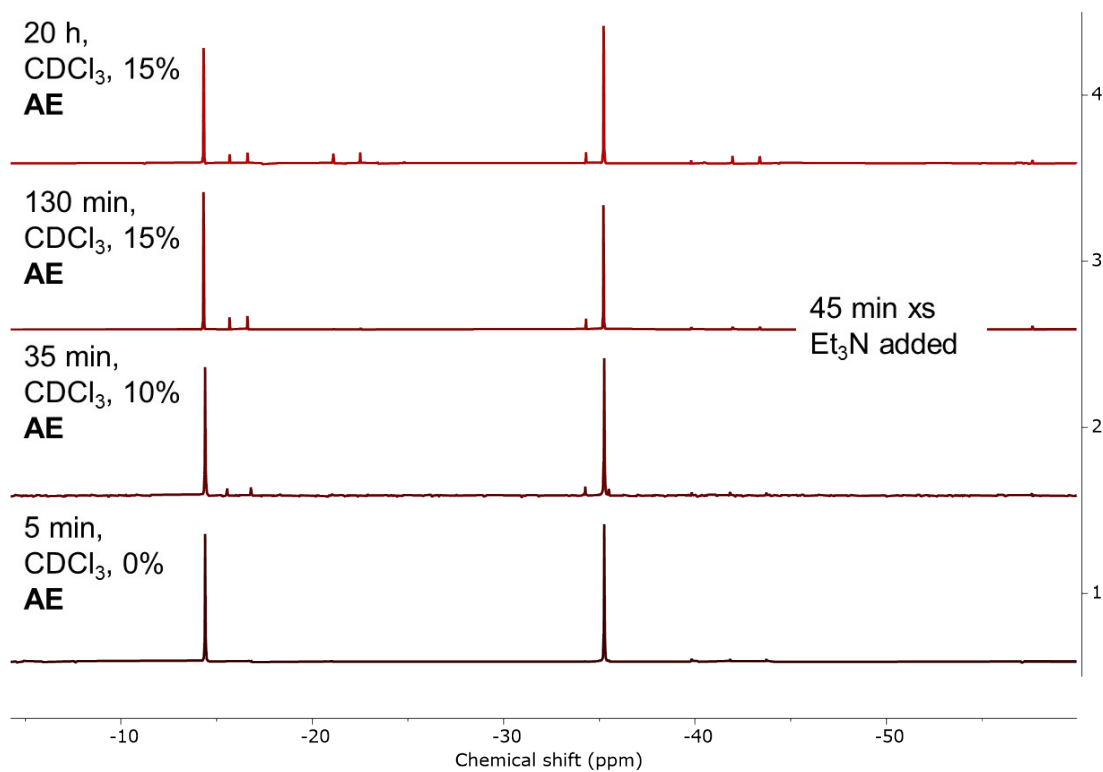

**ESI 4.2.12.** Amine ( $Et_3N$ ,  $\sim 3$ -fold excess) inhibition in the  $A_2/E_2$  metathesis reaction. No change in the proportion of  $A_2/E_2/AE$  within 20 h of amine addition, though minor oxidation is observed.

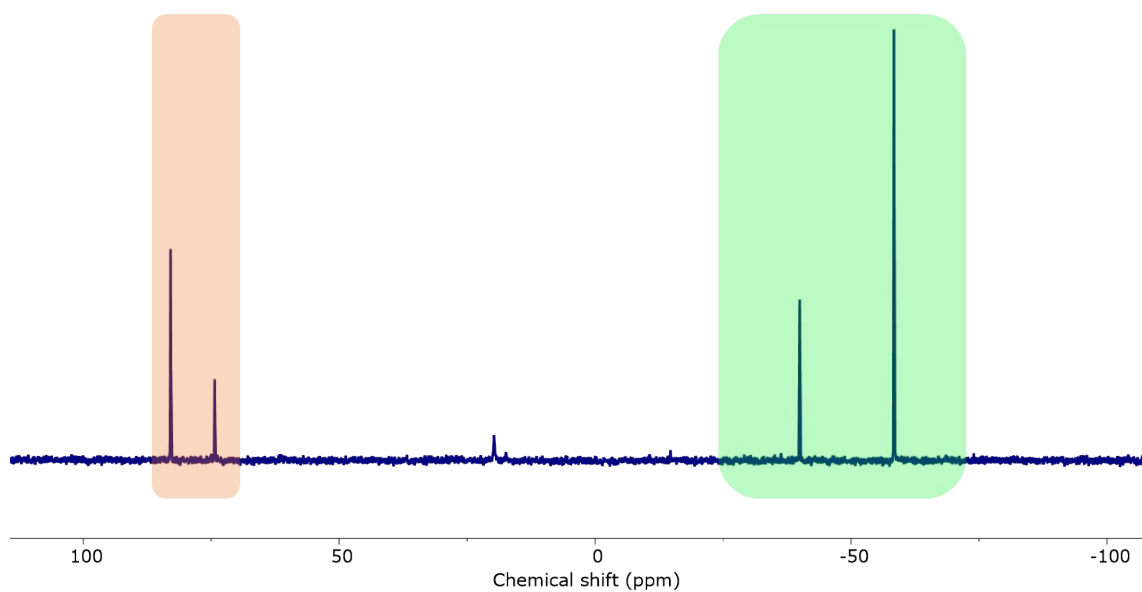

**ESI 4.2.13.** HCl (~5-fold excess) cleavage of  $A_2/E_2$  in THF. Chlorophosphines are highlighted in orange and secondary phosphines in green. The addition of sub-stoichiometric quantities of HCl resulted in proportionate cleavage of the PP bond.

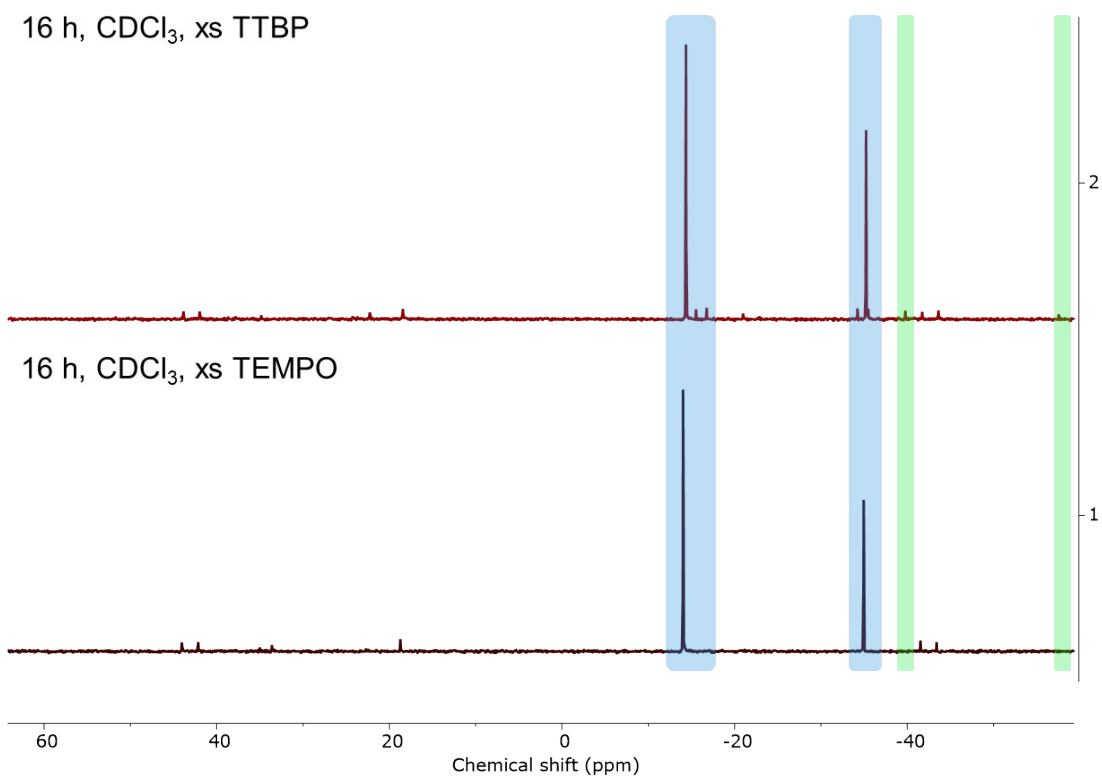

**ESI 4.2.14.** TTBP/TEMPO (4-fold excesses) radical inhibition of  $A_2/E_2$  metathesis in chloroform. Diphosphanes are highlighted in blue and secondary phosphines in green. Other, non-highlighted, resonances correspond to oxides. Note equilibrium is normally fully established (with 50% AE) within 12 h.

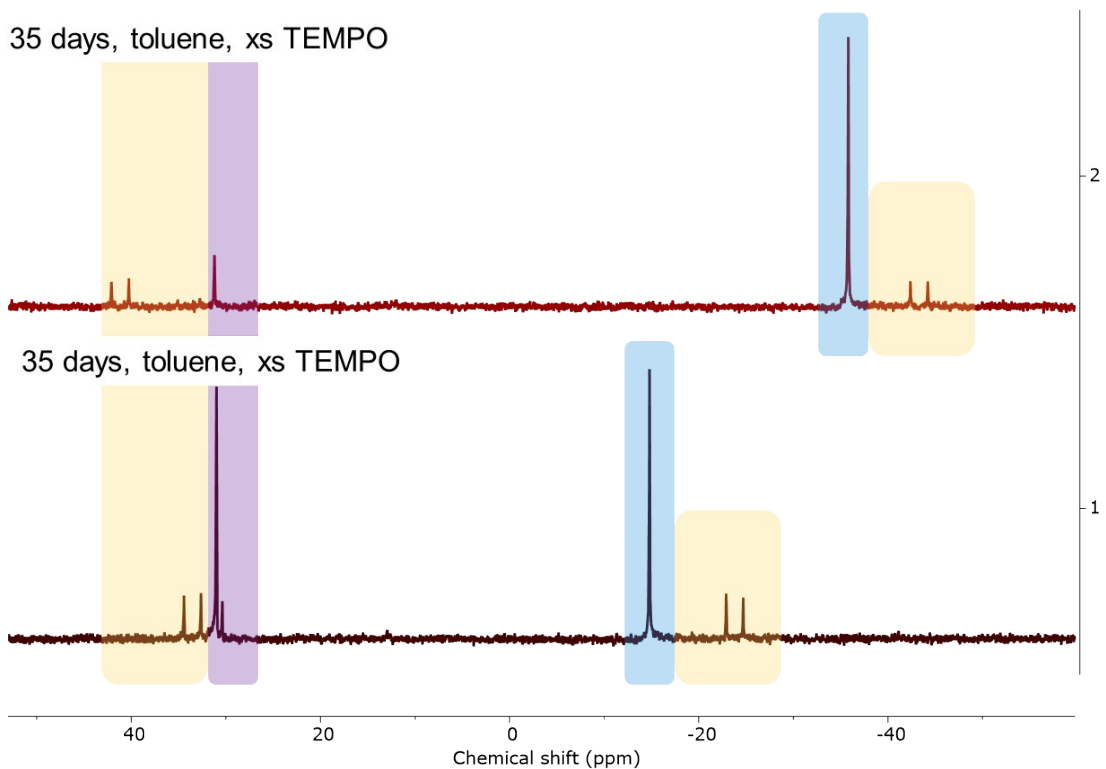

**ESI 4.2.15.** The reaction of  $A_2$  (bottom) and  $E_2$  (top) with TEMPO (~4-fold excess).

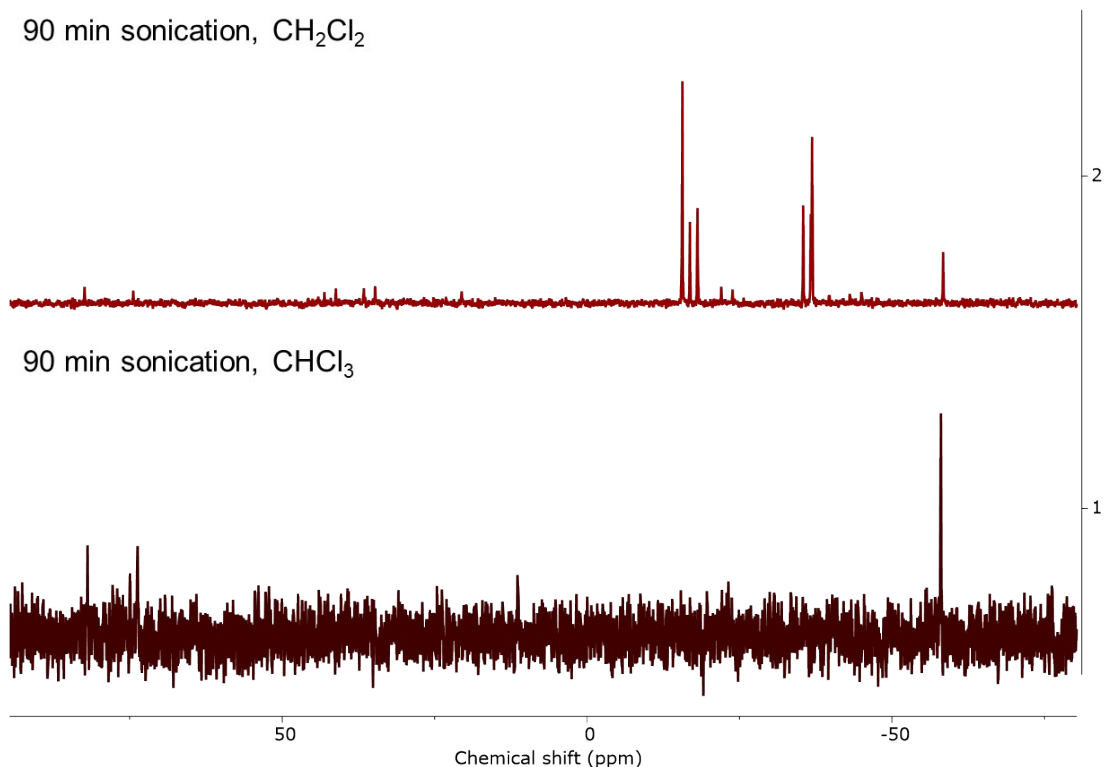

**ESI 4.2.16.** Pulse-sonicated  $A_2/E_2$  metathesis in chloroform (bottom) and DCM (top). Note, after 90 mins no diphosphanes remain in the chloroform sample, all that is visible are the two chlorophosphines and  $oTolyl_2PH$  (-58 ppm).

150 min sonication,  $\text{CHCl}_3$

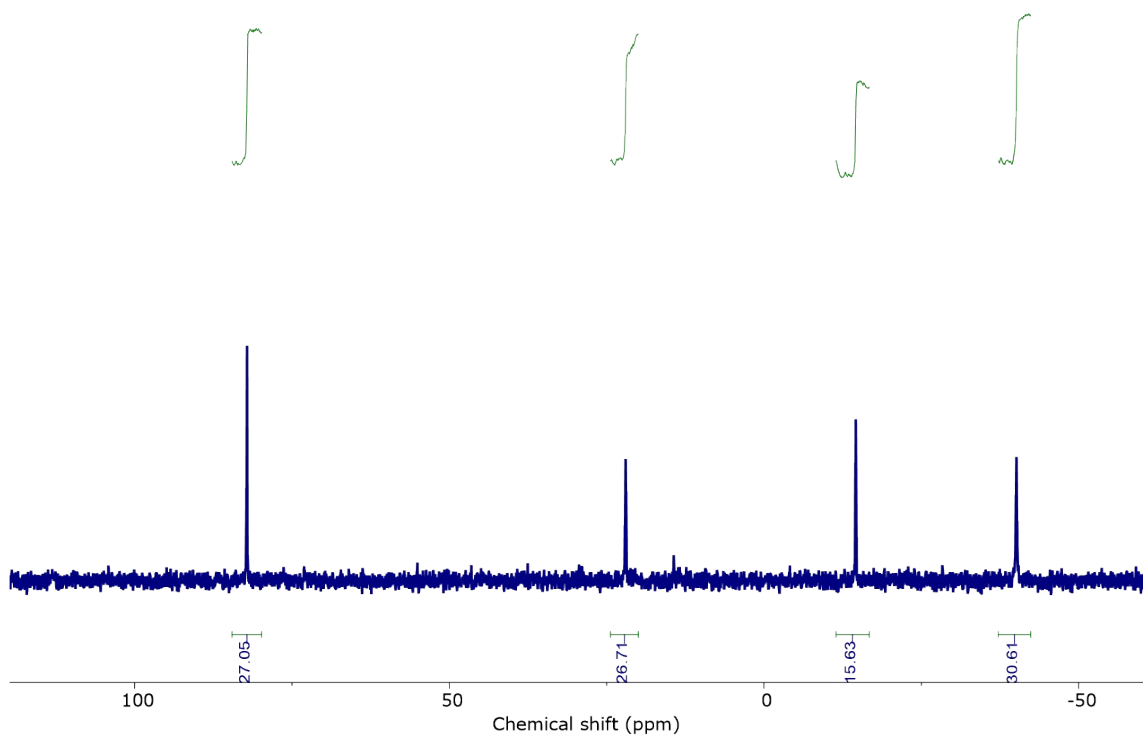

ESI 4.2.17. Ultrasonication of pure  $\text{A}_2$  in chloroform for 2.5 h. Left to right:  $\text{Ph}_2\text{PCI}$ ,  $\text{Ph}_2\text{P(O)H}$ ,  $\text{A}_2$  and  $\text{Ph}_2\text{PH}$ .

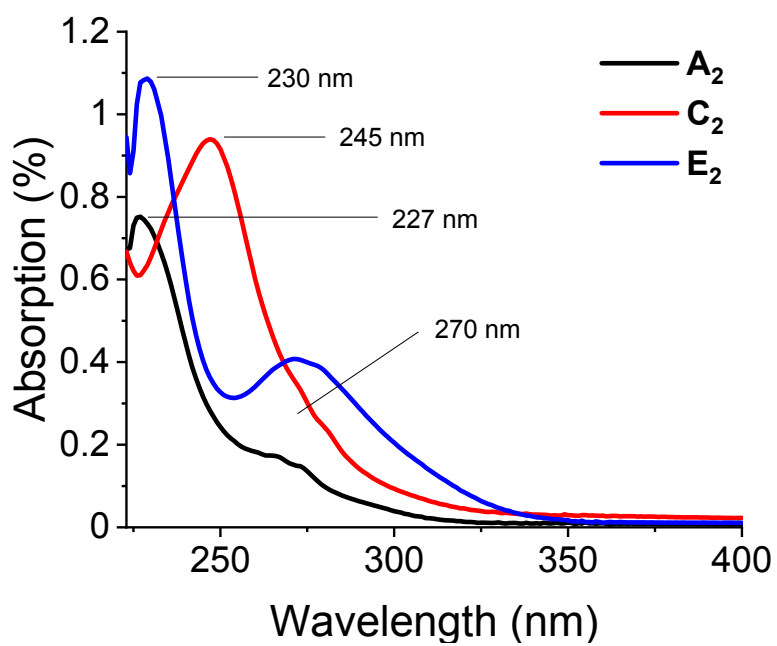

ESI 4.3. UV-vis spectra of  $\text{A}_2$ ,  $\text{C}_2$  and  $\text{E}_2$ .

## 5 – Computational details

### 5.1 – Computational methods

All calculations were performed in ORCA v. 4.1.1.<sup>1</sup> Unless otherwise specified calculations utilised the resolution of identity with the chain of spheres approximation for the exchange integrals (RIJCOSX) with the default auxiliary basis sets (*AutoAux* keyword).<sup>2</sup> Geometry optimisations were performed with the hybrid PBE0 functional,<sup>3</sup> D3BJ dispersion correction,<sup>4,5</sup> and the def2-SVP basis set.<sup>6</sup> Vibrational frequencies were calculated at the same level of theory to assign stationary points as either minima or transition structures, as characterised by the presence of none or a single imaginary frequency respectively. Thermodynamic corrections were calculated at 298.15 K in a 1 M standard state using the quasi-rigid rotor harmonic oscillator (q-RRHO) approximation.<sup>7</sup> Where applicable solvent effects were accounted for with the SMD implicit solvent model<sup>8</sup> using parameters appropriate for tetrahydrofuran (THF) or chloroform at the single point level of theory. Single point energies were calculated using the same dispersion corrected functional (PBE0-D3BJ) in conjunction with the larger def2-TZVPP basis set on all atoms.<sup>6</sup> Transition state searches and combinatorial reaction energy calculations were performed with autodE.<sup>9</sup> TD-DFT calculations additionally employed CAM-B3LYP<sup>10</sup> and M06-2X<sup>11</sup> functionals.

### 5.2 – Closed shell mechanistic possibilities

To limit the conformational flexibility and thus the conformational noise in the calculations we first explored the mechanism of PP metathesis in  $\text{Me}_2\text{PPMe}_2$ . Then, having established the lowest energy conformation of the intermediates and transition state(s) (shown in Figure 6.2.1, 6.2.2), obtained the mechanism for the analogous aryl systems assuming the same P–P dihedrals (Figure 6.2.3, 6.2.4). The high energy P(V) intermediate **int1-MeMe** can be viewed in two resonance forms: either a covalent or ionic form (Figure 6.2.5). A selection of ‘wavefunction’ (Kohn–Sham orbital and density) analysis tools suggest a reasonably consistent picture that the covalent form is the more accurate representation (Figure 6.2.3, Table 6.2.1). The Laplacian of the electron density is negative at the bond critical point between the central phosphorus ( $\text{P}_4$ ) and the ‘bonded’  $\text{PMe}_2$  moiety ( $\text{P}_2$ ), indicating a local concentration of electron density and is generally considered to indicate a covalent bond.<sup>12</sup>

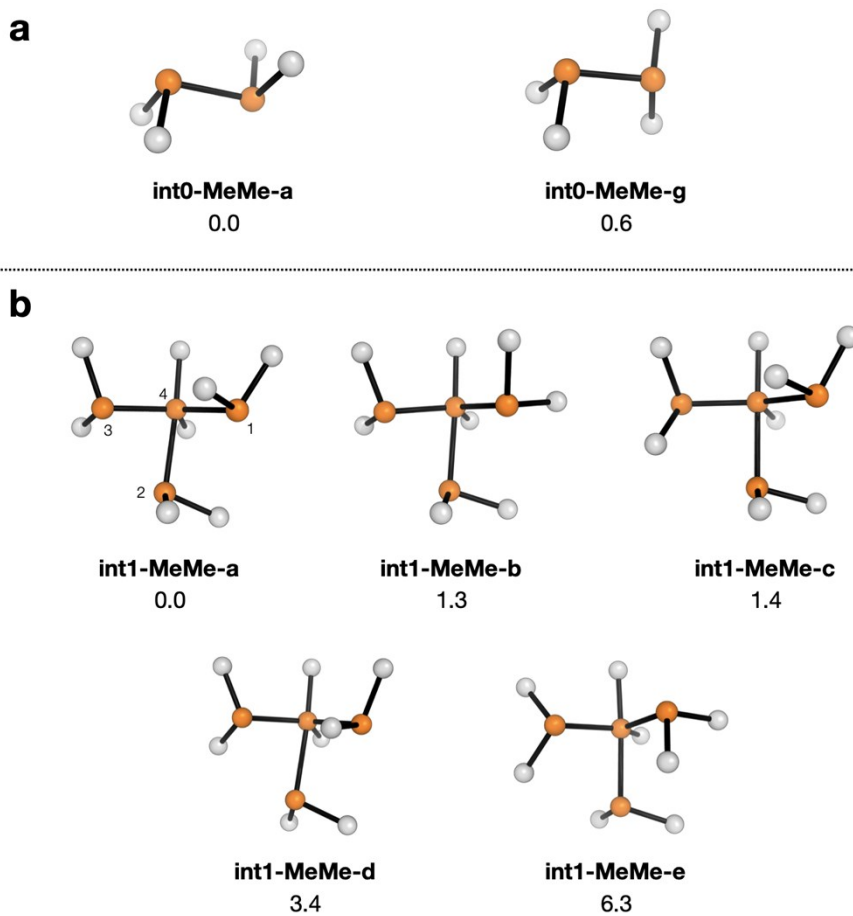

**ESI 6.2.1.** Conformations and relative free energies ( $\Delta G$ ) in kcal mol<sup>-1</sup> of (a) Me<sub>2</sub>PPMe<sub>2</sub> (**int0-MeMe**) and (b) **int1-MeMe**. Calculations performed at the PBE0-D3BJ/def2-TZVPP//PBE0-D3BJ/def2-SVP level of theory. Hydrogens are omitted for clarity.

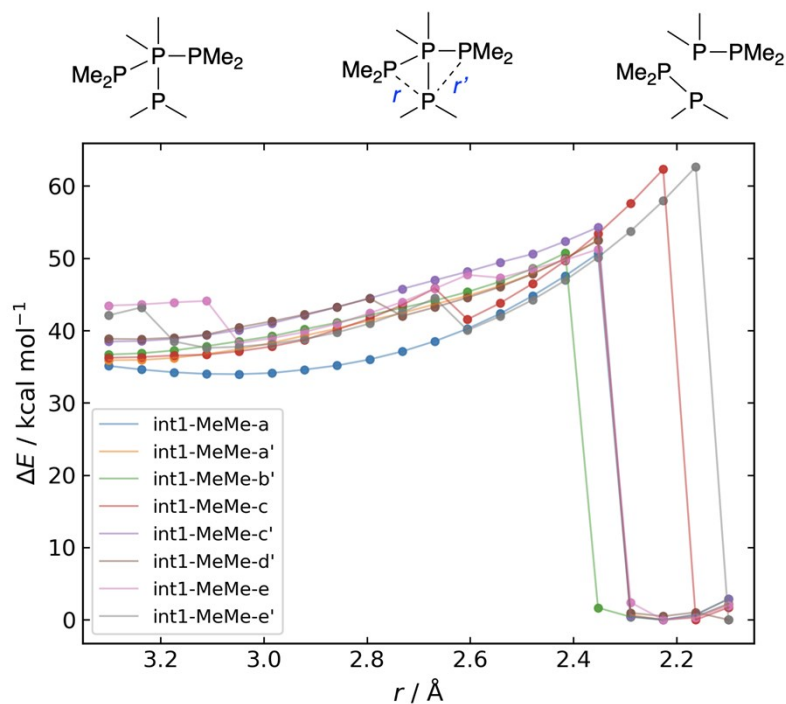

**ESI 6.2.2.** Relaxed potential energy surface scans from **int1-MeMe** to **int0-MeMe** over **ts1-MeMe**. Scans performed from left( $r$ ) and right( $r'$ ) migration of  $\text{PMe}_2$  from **int1-MeMe** conformers shown in **Figure 6.2.1**. **int1-MeMe-b** and **int1-MeMe-d** did not converge after 250 geometry optimisation cycles.

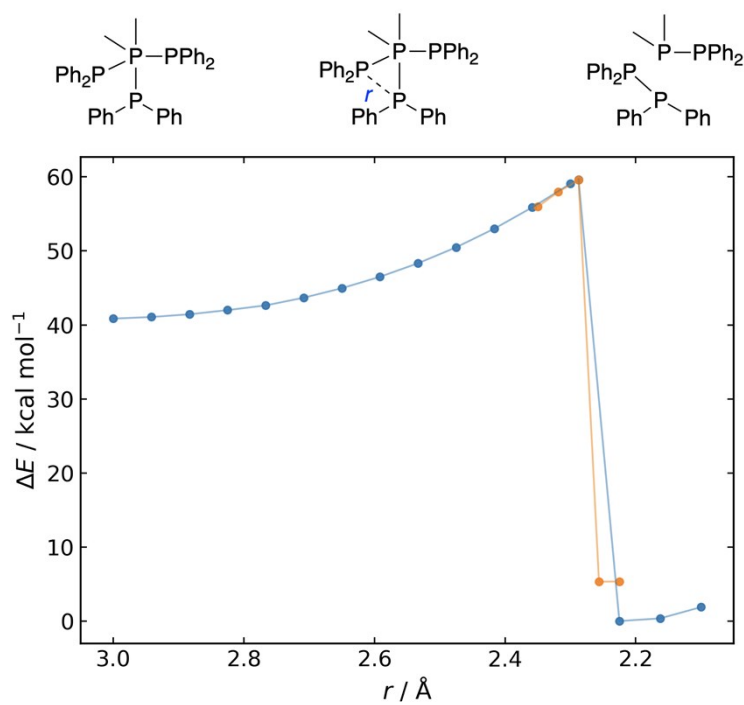

**ESI 6.2.3.** **int1-PhPh** equivalent of Figure 6.2.2 for the lowest energy **int1** conformer. Colours correspond to differing spacings between points in the PES scan.





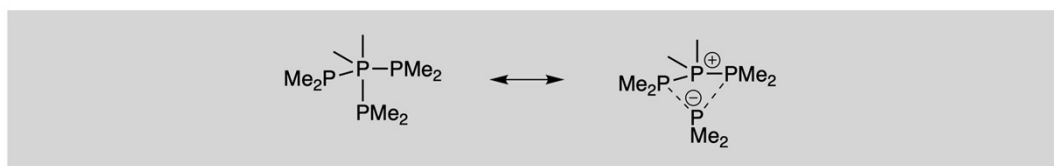

a. Distances (Å)

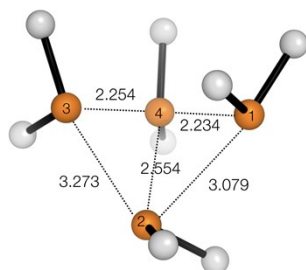

b. Mayer bond orders

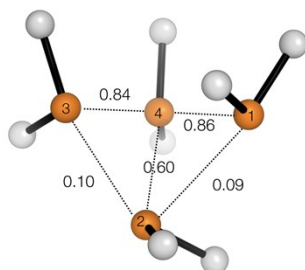

c. Wiberg bond orders

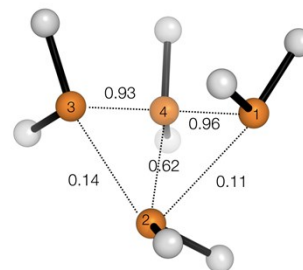

d. Hirshfeld partial charges (e)

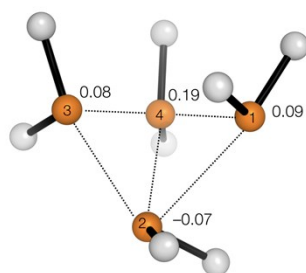e. Laplacian of the electron density along P<sub>4</sub>-P<sub>2</sub>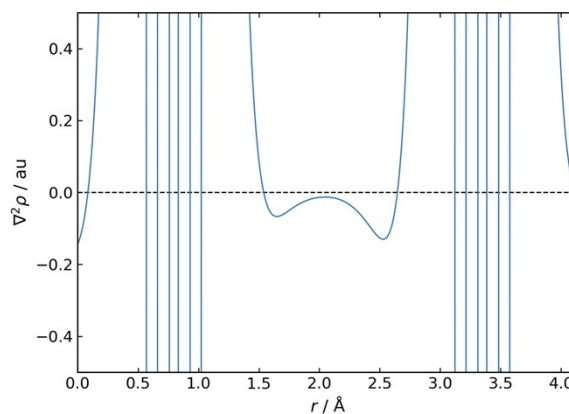

**ESI 6.2.5.** Distance and population/density analysis on **int1-MeMe** performed using MultiWfn v. 3.6.<sup>13</sup> P<sub>2</sub>-P<sub>8</sub> line contains a bond critical point (BCP).

**Table 6.2.1.** Partial atomic charges (e) of phosphorus atoms in **int1-MeMe-a** calculated at PBE0-D3BJ/def2-SVP using different schemes. Numbering as **Figure CX12**.

| Scheme    | P <sub>1</sub> | P <sub>2</sub> | P <sub>3</sub> | P <sub>4</sub> |
|-----------|----------------|----------------|----------------|----------------|
| Mulliken  | 0.07           | -0.14          | 0.05           | 0.00           |
| Löwdin    | 0.32           | 0.12           | 0.30           | 0.49           |
| Hirshfeld | 0.09           | -0.07          | 0.08           | 0.19           |

## 5.3 – Radical mechanistic possibilities

To probe the possibility of thermally generated P-based radicals from aryl diphosphanes the relative stability of the corresponding  $\text{Ar}_2\text{P}\bullet$  radicals are computed in the gas phase (**Table 6.3.1**). Identical aryl conformations are utilised as to remove the conformational noise associated with the multiple CCPC dihedral angles possible. Even with the entropic favourability associated with the 1→2 molecularity change, homolytic cleavage of the PP bond is endergonic by some 35 kcal mol<sup>-1</sup> and not thermally feasible under the reaction conditions.

**Table CX1.** Reaction energetics for  $\text{R}_2\text{PPR}_2 \rightarrow \text{R}_2\text{P}\bullet$ . *a.* Diphosphane contained 1 or 2 imaginary modes associated with aryl rotation (<20i cm<sup>-1</sup>). *b.* Convergence to RMSD(gradient) < 0.005 au (Loose threshold in ORCA) could not be achieved but the computed frequencies were all real.

| <i>R</i>                              | kcal mol <sup>-1</sup> |            |            |
|---------------------------------------|------------------------|------------|------------|
|                                       | $\Delta E$             | $\Delta H$ | $\Delta G$ |
| 3,5-diCF <sub>3</sub> Ph <sup>b</sup> | 55.8                   | 53.2       | 39.2       |
| <i>o</i> -tolyl                       | 54.7                   | 52.3       | 36.1       |
| <i>p</i> -tolyl <sup>a</sup>          | 52.3                   | 48.6       | 38.9       |
| <i>p</i> -OMePh <sup>a</sup>          | 51.4                   | 50.2       | 35.9       |
| Ph <sup>a</sup>                       | 52.2                   | 51.4       | 36.0       |

Given the possibility of photochemical PP homolysis to deliver phosphinyl radicals ( $\text{Ar}_2\text{P}\bullet$ ) the metathesis reaction  $\text{Ar}_2\text{P}\bullet + \text{Ar}'_2\text{PPAr}'_2 \rightarrow \text{Ar}_2\text{PPAr}'_2 + \text{Ar}'_2\text{P}\bullet$  was investigated following the model methyl-substituted system. The reaction is found to be energetically viable at room temperature given some initial non-zero concentration of radical, for both Ar = Ph (Figure 6.3.1) and Ar = *o*-tolyl (Figure 6.3.2). Note that the TS barrier for the *o*-tolyl variant has not been extensively conformationally sampled due more than (2 Ar rotations)<sup>6</sup> × (2 methyl positions)<sup>6</sup> = 4,096 possibilities for the six equivalent aryls. Nevertheless, the low barrier suggests that any phosphinyl in solution would react quickly with PP species. Interestingly, the model methyl-substituted diphosphane exhibits slightly different reactivity, with the symmetric  $[\text{Me}_2\text{PP}(\text{Me})_2\text{-PMe}_2]\bullet$  species now a shallow minima on the potential energy surface rather than a transition state (Figure 6.3.3), but also would proceed rapidly at room temperature given an initial concentration of  $\text{Me}_2\text{P}\bullet$ . Steric

bulk at the ortho position of the aryl substituent can increase the barrier significantly (Figure 6.3.4) while the attack of solvent-generated  $\text{Cl}\cdot$  on  $\text{Ar}_2\text{PPAr}_2$  is highly exergonic and rapid (Figure 6.3.5). The intramolecular H-transfer to form a benzyl radical from  $(o\text{-tol})_2\text{P}\cdot$  is endergonic with a free barrier of  $28.8 \text{ kcal mol}^{-1}$  (Figure 6.3.6), which is out of reach for a thermal reaction at room temperature. However, following excitation to  $S_1$ , intersystem crossing to  $T_1$  and relaxation to the minimum there is  $\sim 33 \text{ kcal mol}^{-1}$  of excess energy (Figure 6.3.6) that may facilitate hydrogen abstraction to form a benzylic radical. Coupled with the non-negligible quantum tunnelling in H-transfer reactions accelerating the relative rate this reaction is feasible, which – upon thermalisation with the solvent – would give a reasonably slow backwards reaction to  $(o\text{-tol})_2\text{P}\cdot$ , thus may explain the slow rate with *o*-tolyl substituted aryls.

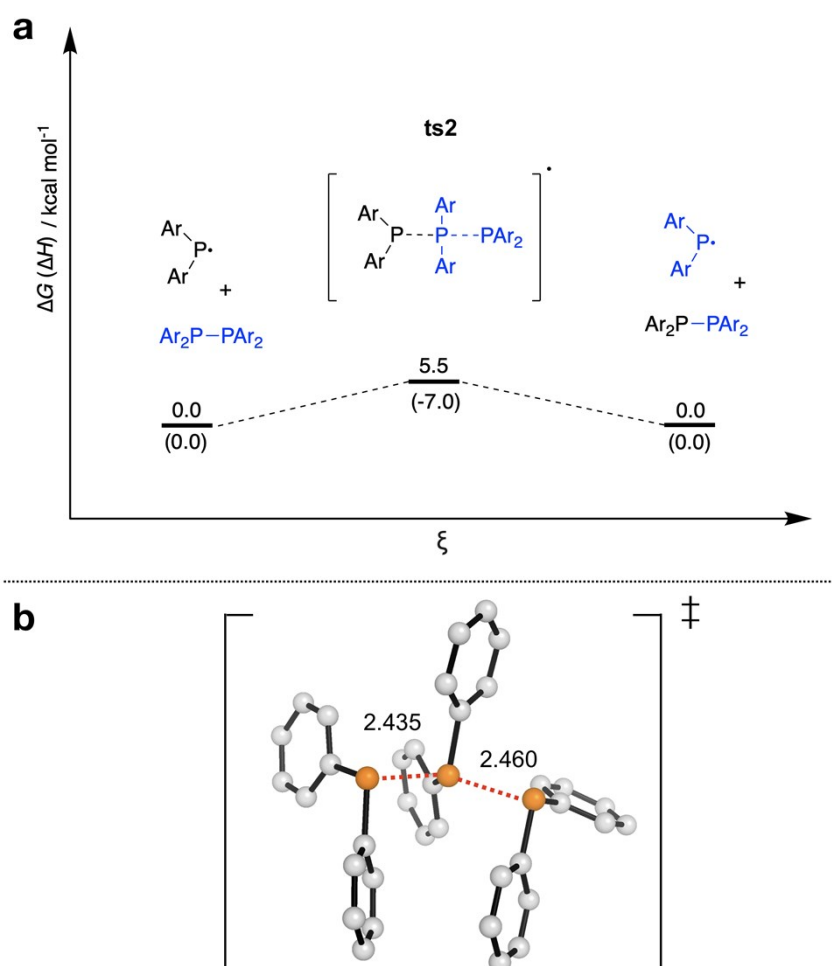

**ESI 6.3.1.** (a) Reaction free energy profile for the PP homo-metathesis of  $\text{Ph}_2\text{PPPPh}_2$  via  $\text{Ph}_2\text{P}\cdot$ , where  $\text{Ar} = \text{Ph}$  and (b) **ts2-PhPh** geometry. TS contained a second spurious imaginary frequency corresponding to phenyl

rotation  $\nu = 10.69i \text{ cm}^{-1}$ . Potential energy barrier from association complex at PBE0-D3BJ/def2-SVP is  $\sim 3.0 \text{ kcal mol}^{-1}$ . Key distances are shown in Å and hydrogens omitted for clarity.

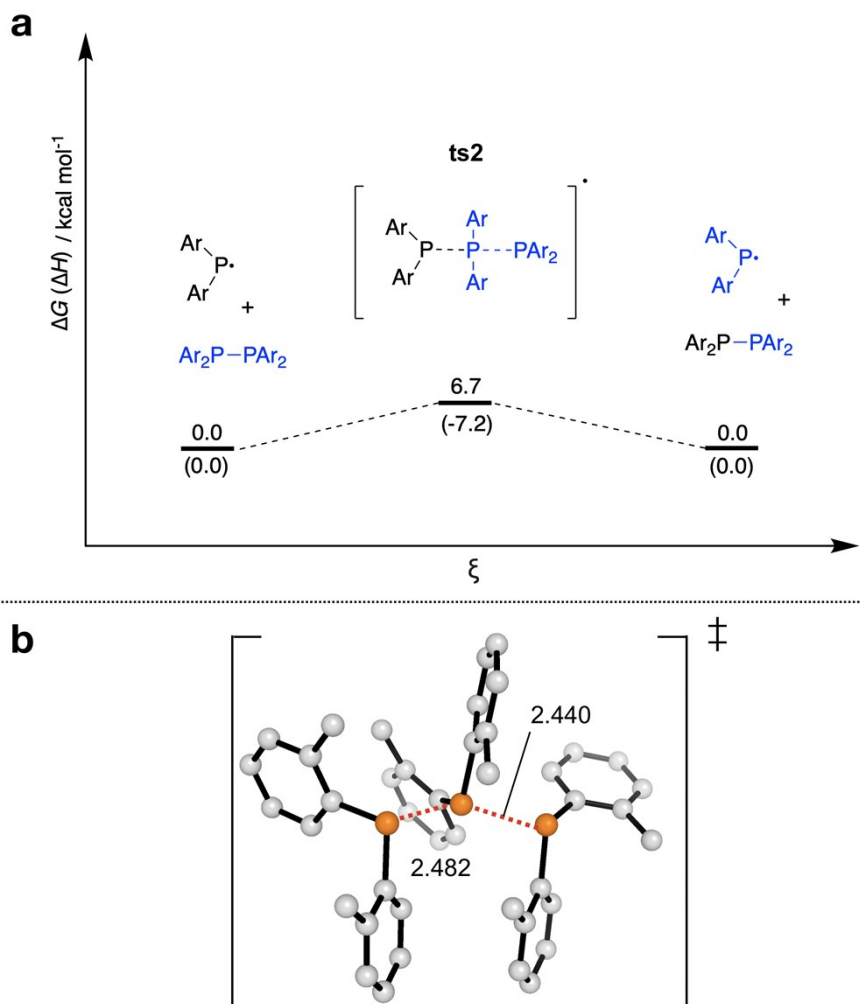

**ESI 6.3.2.** As Figure 6.3.1 for Ar = *o*-Tol. TS contained a second spurious imaginary frequency  $\nu = 46.53i \text{ cm}^{-1}$ .

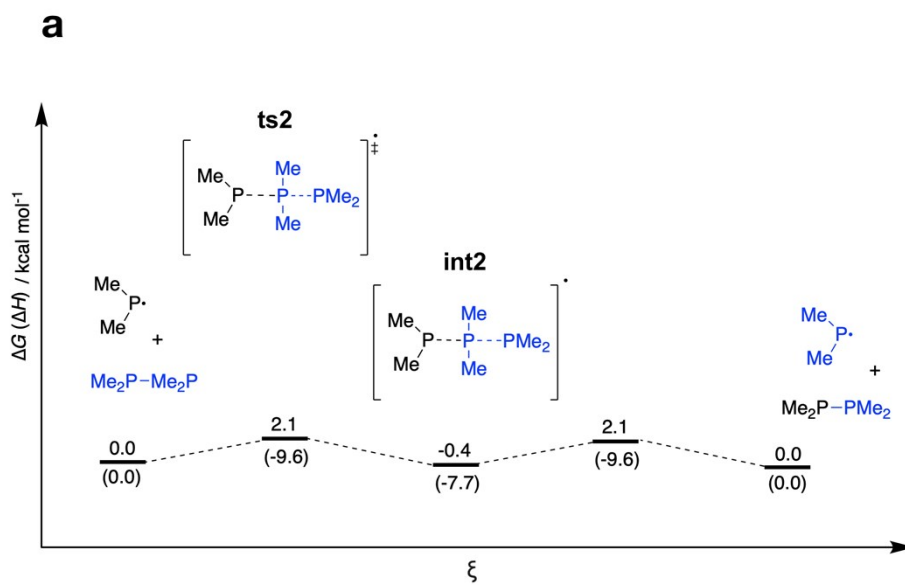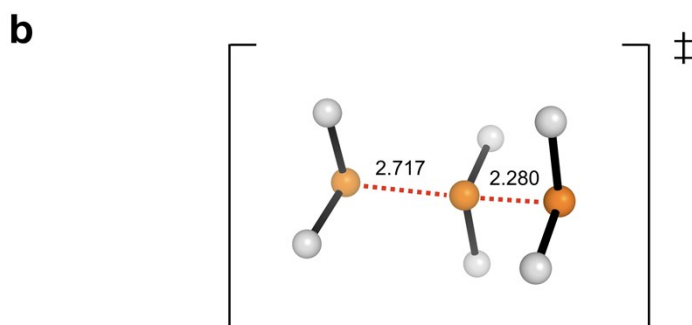

ESI 6.3.3. As Figure 6.3.1 for Me<sub>2</sub>PPMe<sub>2</sub> + Me<sub>2</sub>P•.

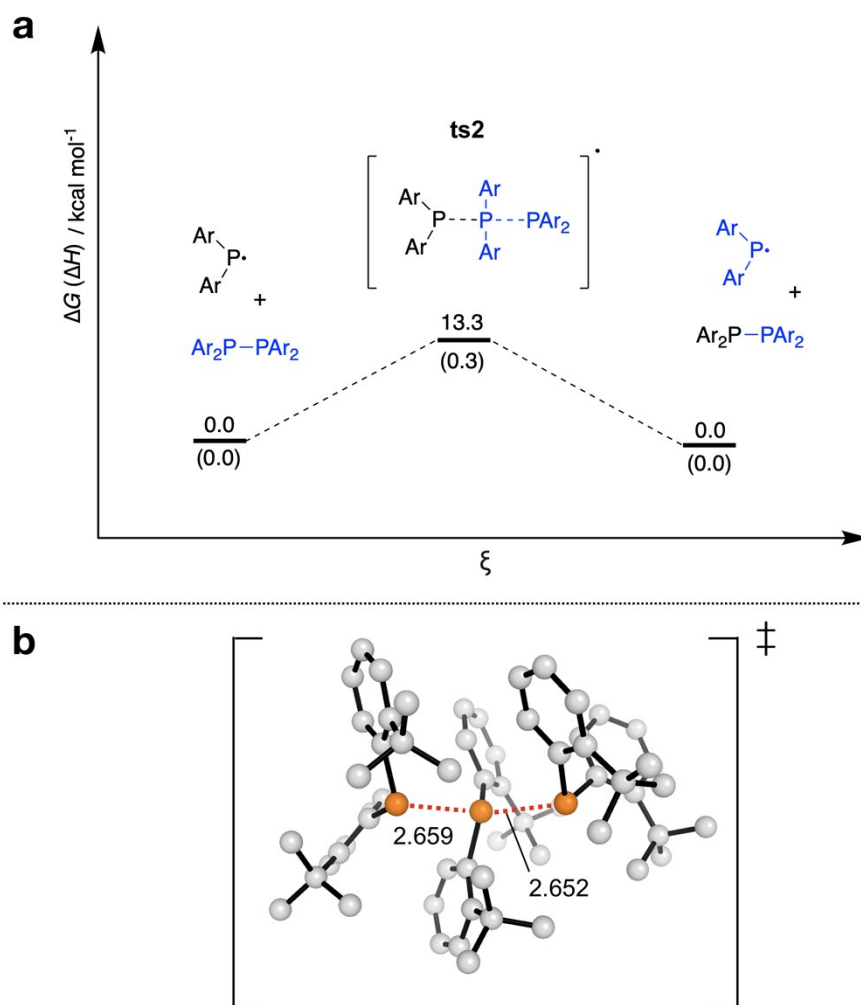

**ESI 6.3.4.** As Figure 6.3.1 with  $\text{Ar} = o\text{-}^t\text{Bu-C}_5\text{H}_4$ .

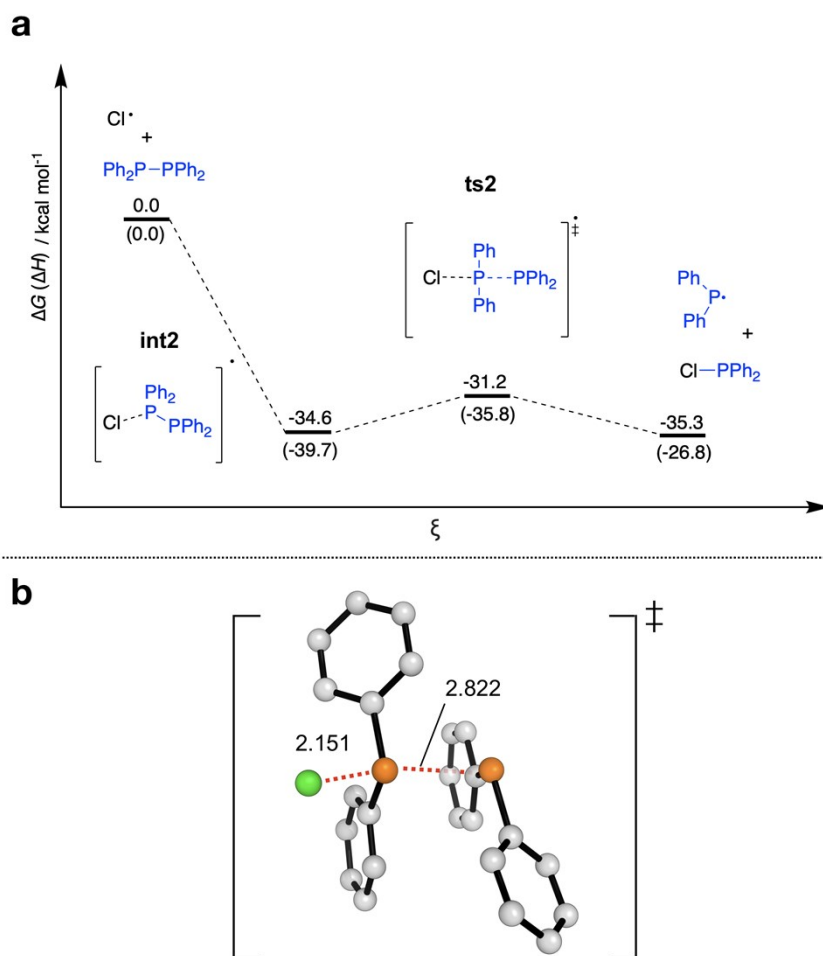

ESI 6.3.5. As Figure 6.3.1 for for Ph<sub>2</sub>PPH<sub>2</sub> + Cl•.



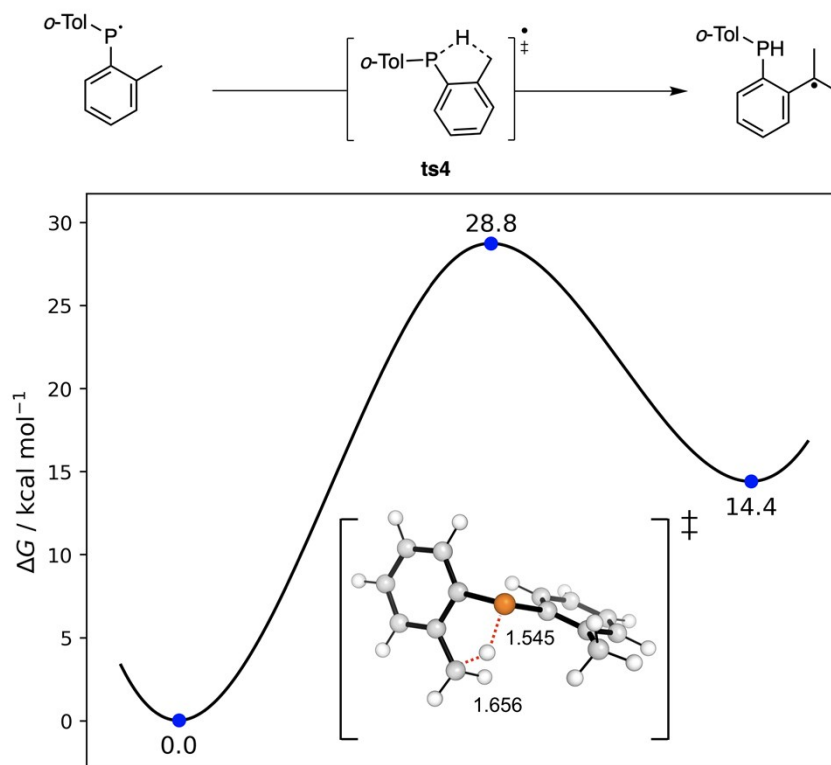

**ESI 6.3.5.** Free energy profile for the intramolecular H-transfer from a phosphorus to benzyl radical in  $(o\text{-tol})_2\text{P}\cdot$  obtained directly from autodE. Geometry of the optimised TS with key distances in Å overlaid.

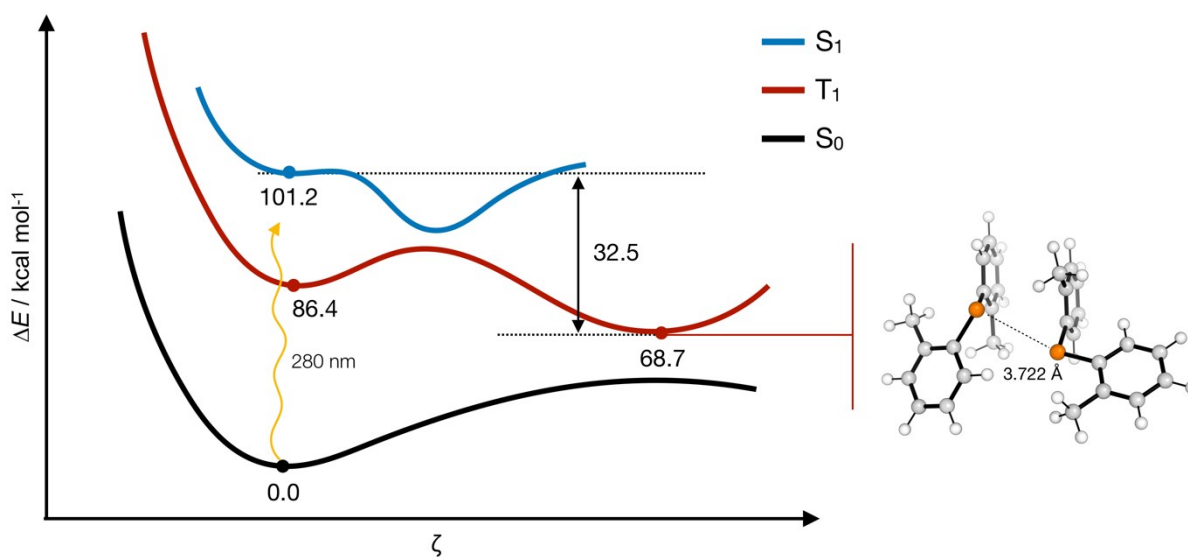

**ESI 6.3.6.** Schematic excited state energy level diagram of  $(o\text{-tol})_2\text{PP}(o\text{-tol})_2$  calculated at CAM-B3LYP/def2-TZVP//PBE0-D3BJ/def2-SVP. Functional chosen based on the data in Table 6.4.1 to match the experimental UV-vis spectrum of  $\text{Ph}_2\text{PPh}_2$ .

#### 5.4 – UV-Vis interpretation

Time-dependent density functional theory (TD-DFT) calculations were performed using a selection of functionals to test the functional dependence of vertical electronic excitation energies on  $\text{Ph}_2\text{PPh}_2$ , which are known to be fairly functional dependent (RMSE  $\sim 0.5$  eV).<sup>14,15</sup> **Table 6.4.1** outlines the obtained results with three well performing functionals in TD-DFT calculations on organic molecules. The range of excitation predictions is around 0.5 eV with little effect of solvent and the range separated CAM-B3LYP functional comparing favourably to experiment. Transition density difference plots (Figure 6.4.1, 6.4.2) suggest the transitions have dominant  $n \rightarrow \pi^*$  ( $S_0 \rightarrow S_1$ ) and  $\sigma \rightarrow \sigma^*$  ( $S_0 \rightarrow S_2$ ) character with little qualitative variation between functionals. Optimisation of the triplet state led to fragmentation into two  $\text{Ph}_2\text{P}^\bullet$  radicals.

**Table 6.4.1.** Excitation energies to the first two excited states ( $S_1$ ,  $S_2$ ) with significant transition dipole oscillator strengths. All calculations used the def2-TZVPP basis set at PBE0-D3BJ/def2-SVP geometries.

| Method        | Excitation energy / eV |       | $\lambda$ / nm |       |
|---------------|------------------------|-------|----------------|-------|
|               | $S_1$                  | $S_2$ | $S_1$          | $S_2$ |
| PBE0          | 3.946                  | 5.038 | 314.2          | 246.1 |
| SMD(DCM)-PBE0 | 4.011                  | 5.030 | 309.1          | 246.5 |
| CAM-B3LYP     | 4.404                  | 5.575 | 281.5          | 222.4 |
| M06-2X        | 4.242                  | 5.443 | 292.3          | 227.8 |

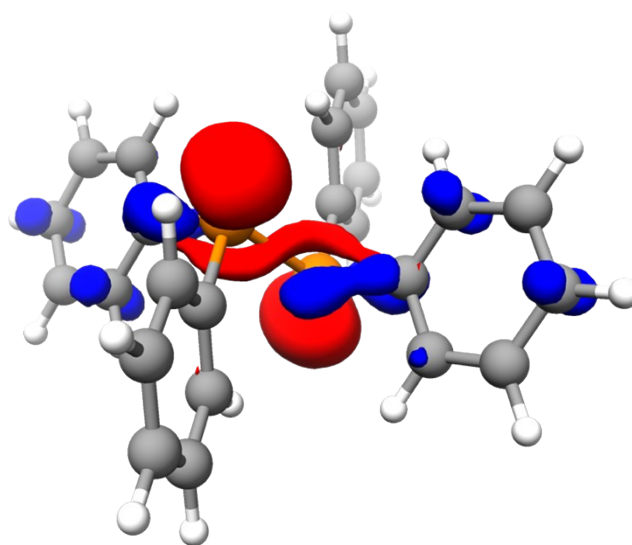

**ESI 6.4.1.** Transition electron density difference calculated with orca\_plot between the  $S_0$  and  $S_1$  states at the CAM-B3LYP/def2-TZVPP//PBE0-D3BJ/def2-SVP level of theory. Red/blue corresponds to depleted/excess electron density respectively. Isosurface plotted at a contour of 0.003 au.

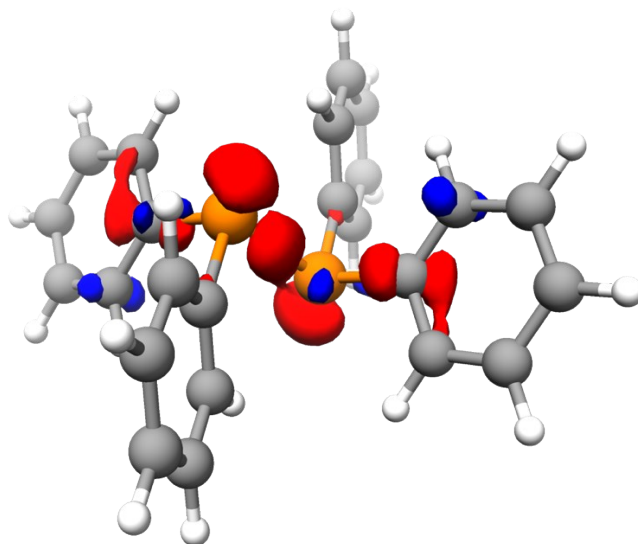

**ESI 6.4.2.** As Figure 6.4.1 for the  $S_0$  and  $S_2$  states.

## 5.5 – Cartesian coordinates

Optimised cartesian coordinates ( $\text{\AA}$ ), total potential energies ( $E$ ) and thermal contributions ( $H_{\text{cont}}$ ,  $G_{\text{cont}}$ ) calculated at PBE0-D3BJ/def2-SVP, and single point energies ( $E_{\text{sp}}$ ) at PBE0-D3BJ/def2-TZVPP//PBE0-D3BJ/def2-SVP all in Hartrees. Note the latter do not include the 1 atm  $\rightarrow$  1 M standard state correction.

**int0-MeMe**

|                                |                                |         |         |         |         |         |         |                                |         |         |         |
|--------------------------------|--------------------------------|---------|---------|---------|---------|---------|---------|--------------------------------|---------|---------|---------|
| E: -841.6014756                |                                | H       | -3.3844 | 2.3388  | 2.3388  |         |         |                                |         |         |         |
| $H_{\text{cont}}$ : 0.16317247 | E: -1683.15383389              | H       | -2.8908 | -1.4405 | -1.4405 |         |         |                                |         |         |         |
| $G_{\text{cont}}$ : 0.11725234 | $H_{\text{cont}}$ : 0.32782527 | H       | -3.8689 | 0.0535  | 0.0535  |         |         |                                |         |         |         |
| $E_{\text{sp}}$ : -842.0159307 | $G_{\text{cont}}$ : 0.25911768 | H       | -2.3821 | -0.1510 | -0.1510 |         |         |                                |         |         |         |
|                                | $E_{\text{sp}}$ : -1683.982137 | H       | 0.4933  | -1.1983 | -1.1983 |         |         |                                |         |         |         |
| P                              | -3.1471                        | -0.8025 | -0.8025 | H       | 1.1808  | -2.3027 | -2.3027 |                                |         |         |         |
| P                              | -1.0344                        | -0.2239 | -0.2239 | P       | -1.7807 | 0.4217  | 0.4217  | H                              | 0.5556  | -0.7062 | -0.7062 |
| C                              | -3.7368                        | 0.8496  | 0.8496  | P       | -1.2662 | -2.3657 | -2.3657 | H                              | -1.9355 | -3.3894 | -3.3894 |
| C                              | -3.7553                        | -0.7178 | -0.7178 | C       | -2.8450 | -0.3527 | -0.3527 | H                              | -0.6191 | -2.2005 | -2.2005 |
| C                              | -0.4266                        | -0.3077 | -0.3077 | C       | -2.3010 | 2.1886  | 2.1886  | H                              | -0.2599 | -3.7972 | -3.7972 |
| C                              | -0.4446                        | -1.8763 | -1.8763 | C       | -0.9951 | -2.9754 | -2.9754 | H                              | -5.1419 | -3.5416 | -3.5416 |
| H                              | -3.3298                        | 1.0375  | 1.0375  | C       | 0.3901  | -1.5540 | -1.5540 | H                              | -3.4298 | -3.1030 | -3.1030 |
| H                              | -3.4404                        | 1.6756  | 1.6756  | P       | -4.3315 | -2.1577 | -2.1577 | H                              | -4.7376 | -1.9226 | -1.9226 |
| H                              | -4.8344                        | 0.8327  | 0.8327  | P       | -2.9140 | -0.4170 | -0.4170 | H                              | -6.7310 | -2.3290 | -2.3290 |
| H                              | -3.3082                        | -1.5350 | -1.5350 | C       | -4.4147 | -2.7159 | -2.7159 | H                              | -6.3538 | -0.8254 | -0.8254 |
| H                              | -4.8472                        | -0.8625 | -0.8625 | C       | -6.0490 | -1.4637 | -1.4637 | H                              | -6.1658 | -0.9034 | -0.9034 |
| H                              | -3.5132                        | 0.2408  | 0.2408  | C       | -4.2131 | 0.9687  | 0.9687  |                                |         |         |         |
| H                              | -0.8737                        | 0.5098  | 0.5098  | C       | -2.1823 | -0.1120 | -0.1120 |                                |         |         |         |
| H                              | -0.6688                        | -1.2660 | -1.2660 | H       | -1.9349 | -1.0690 | -1.0690 | <b>ts1-MeMe</b>                |         |         |         |
| H                              | 0.6653                         | -0.1631 | -0.1631 | H       | -1.2538 | 0.4608  | 0.4608  | E: -1683.135903                |         |         |         |
| H                              | -0.8514                        | -2.0648 | -2.0648 | H       | -2.8698 | 0.4660  | 0.4660  | $H_{\text{cont}}$ : 0.32623367 |         |         |         |
| H                              | 0.6530                         | -1.8594 | -1.8594 | H       | -4.8943 | 0.7548  | 0.7548  | $G_{\text{cont}}$ : 0.25681999 |         |         |         |
| H                              | -0.7410                        | -2.7020 | -2.7020 | H       | -3.7059 | 1.9250  | 1.9250  | $E_{\text{sp}}$ : -1683.965515 |         |         |         |
|                                |                                |         |         | H       | -4.8181 | 1.0874  | 1.0874  |                                |         |         |         |
|                                |                                |         |         | H       | -1.9264 | 2.8172  | 2.8172  |                                |         |         |         |
| <b>int1-MeMe</b>               |                                |         |         | H       | -1.8005 | 2.5293  | 2.5293  | P                              | -1.7939 | 0.7414  | 0.7414  |

|   |         |         |         |                     |              |         |         |                     |              |         |         |
|---|---------|---------|---------|---------------------|--------------|---------|---------|---------------------|--------------|---------|---------|
| P | -1.2026 | -1.9232 | -1.9232 | H                   | -6.2188      | -0.7646 | -0.7646 | H                   | -1.7734      | 1.9749  | 1.9749  |
| C | -2.3750 | -0.1414 | -0.1414 |                     |              |         |         | H                   | -2.2240      | 1.3081  | 1.3081  |
| C | -2.6946 | 2.3784  | 2.3784  |                     |              |         |         | C                   | -2.7040      | 3.2838  | 3.2838  |
| C | -1.1503 | -3.4606 | -3.4606 | <b>int0-PhPh</b>    |              |         |         | C                   | -2.7881      | 4.1349  | 4.1349  |
| C | 0.4464  | -1.9640 | -1.9640 |                     |              |         |         | C                   | -2.4542      | 3.6636  | 3.6636  |
| P | -4.1472 | -1.9134 | -1.9134 | E:                  | -1607.155428 |         |         | C                   | -2.0308      | 2.3465  | 2.3465  |
| P | -3.1680 | 0.0220  | 0.0220  | $H_{\text{cont}}$ : | 0.39097614   |         |         | C                   | -2.2795      | 1.9672  | 1.9672  |
| C | -4.0598 | -2.7275 | -2.7275 | $G_{\text{cont}}$ : | 0.32191687   |         |         | H                   | -4.3377      | -3.7584 | -3.7584 |
| C | -5.9617 | -1.4294 | -1.4294 | $E_{\text{sp}}$ :   | -1608.358873 |         |         | H                   | -3.6787      | -3.6499 | -3.6499 |
| C | -4.4923 | 1.2747  | 1.2747  |                     |              |         |         | H                   | -1.9442      | -2.0192 | -2.0192 |
| C | -2.3137 | 0.0880  | 0.0880  | H                   | 1.4109       | 1.8726  | 1.8726  | H                   | -0.8815      | -0.5043 | -0.5043 |
| H | -1.6440 | -0.7768 | -0.7768 | H                   | 3.1461       | 3.5070  | 3.5070  | H                   | -3.2649      | -2.2470 | -2.2470 |
| H | -1.7321 | 1.0214  | 1.0214  | H                   | 3.8009       | 3.6282  | 3.6282  | C                   | -2.9838      | -2.1872 | -2.1872 |
| H | -3.0562 | 0.0805  | 0.0805  | H                   | 2.7258       | 2.1255  | 2.1255  | C                   | -3.5849      | -3.0397 | -3.0397 |
| H | -5.1401 | 0.9458  | 0.9458  | H                   | 0.3446       | 0.3689  | 0.3689  | C                   | -3.2155      | -2.9795 | -2.9795 |
| H | -4.0432 | 2.2420  | 2.2420  | C                   | 1.7120       | 1.9235  | 1.9235  | C                   | -2.2465      | -2.0639 | -2.0639 |
| H | -5.1060 | 1.4074  | 1.4074  | C                   | 2.6810       | 2.8407  | 2.8407  | C                   | -1.6516      | -1.2077 | -1.2077 |
| H | -2.6191 | 3.0714  | 3.0714  | C                   | 3.0483       | 2.9079  | 2.9079  | C                   | 1.3917       | -1.6117 | -1.6117 |
| H | -2.1233 | 2.8310  | 2.8310  | C                   | 2.4458       | 2.0604  | 2.0604  | C                   | -1.9292      | 1.4866  | 1.4866  |
| H | -3.7474 | 2.3053  | 2.3053  | C                   | 1.1151       | 1.0729  | 1.0729  | C                   | -2.0177      | -1.2537 | -1.2537 |
| H | -1.5902 | -0.8521 | -0.8521 | C                   | 1.4800       | 1.1252  | 1.1252  | P                   | 0.7567       | 0.0824  | 0.0824  |
| H | -3.2967 | -0.7178 | -0.7178 | H                   | 2.4463       | -3.7803 | -3.7803 | P                   | -1.2945      | -0.2068 | -0.2068 |
| H | -2.5557 | 0.5963  | 0.5963  | H                   | 2.5998       | -5.2885 | -5.2885 |                     |              |         |         |
| H | 0.5682  | -1.0434 | -1.0434 | H                   | 2.0029       | -4.4388 | -4.4388 |                     |              |         |         |
| H | 0.5664  | -2.8257 | -2.8257 | H                   | 1.2368       | -2.0945 | -2.0945 | <b>int1-PhPh</b>    |              |         |         |
| H | 1.2732  | -1.9871 | -1.9871 | H                   | 1.6868       | -1.4391 | -1.4391 |                     |              |         |         |
| H | -2.1034 | -3.5440 | -3.5440 | C                   | 1.7427       | -2.0955 | -2.0955 | E:                  | -3214.280709 |         |         |
| H | -0.3323 | -3.4390 | -3.4390 | C                   | 2.1691       | -3.4119 | -3.4119 | $H_{\text{cont}}$ : | 0.78765747   |         |         |
| H | -1.0315 | -4.3720 | -4.3720 | C                   | 2.2544       | -4.2598 | -4.2598 | $G_{\text{cont}}$ : | 0.66999483   |         |         |
| H | -4.6810 | -3.6355 | -3.6355 | C                   | 1.9197       | -3.7854 | -3.7854 | $E_{\text{sp}}$ :   | -3216.679038 |         |         |
| H | -3.0144 | -3.0131 | -3.0131 | C                   | 1.4945       | -2.4685 | -2.4685 |                     |              |         |         |
| H | -4.4374 | -2.1011 | -2.1011 | H                   | -2.9806      | 3.6499  | 3.6499  | P                   | -1.5670      | 0.6627  | 0.6627  |
| H | -6.5333 | -2.3611 | -2.3611 | H                   | -3.1318      | 5.1639  | 5.1639  | P                   | -1.2457      | -2.3029 | -2.3029 |
| H | -6.2905 | -0.9684 | -0.9684 | H                   | -2.5362      | 4.3197  | 4.3197  | P                   | -4.3246      | -2.2917 | -2.2917 |

|   |         |         |         |   |         |         |         |                     |              |         |         |
|---|---------|---------|---------|---|---------|---------|---------|---------------------|--------------|---------|---------|
| P | -2.9771 | -0.3327 | -0.3327 | C | -2.2378 | 5.2405  | 5.2405  | C                   | 2.2097       | -0.2453 | -0.2453 |
| C | -8.4610 | -0.8849 | -0.8849 | C | -3.0462 | 4.5138  | 4.5138  | C                   | 0.8709       | -0.5661 | -0.5661 |
| C | -8.1643 | -0.6441 | -0.6441 | C | -2.8609 | 3.1426  | 3.1426  | C                   | 0.5016       | -1.7550 | -1.7550 |
| C | -6.9626 | -1.0813 | -1.0813 | C | -1.8711 | 2.4741  | 2.4741  | C                   | 1.5347       | -2.6092 | -2.6092 |
| C | -6.0157 | -1.7457 | -1.7457 | C | -1.0308 | 3.2262  | 3.2262  | C                   | 2.8727       | -2.2796 | -2.2796 |
| C | -6.3476 | -2.0179 | -2.0179 | C | -1.2157 | 4.5980  | 4.5980  | H                   | 4.2694       | -0.8368 | -0.8368 |
| C | -7.5572 | -1.5951 | -1.5951 | H | -2.4041 | 6.3125  | 6.3125  | H                   | 2.4640       | 0.6846  | 0.6846  |
| H | -9.4008 | -0.5270 | -0.5270 | H | -3.8327 | 5.0203  | 5.0203  | H                   | 0.1068       | 0.1291  | 0.1291  |
| H | -8.8756 | -0.1012 | -0.1012 | H | -3.4923 | 2.5828  | 2.5828  | H                   | 1.2825       | -3.5466 | -3.5466 |
| H | -6.7608 | -0.8817 | -0.8817 | H | -0.2312 | 2.7152  | 2.7152  | H                   | 3.6500       | -2.9597 | -2.9597 |
| H | -5.6407 | -2.5774 | -2.5774 | H | -0.5587 | 5.1680  | 5.1680  | C                   | -1.5135      | -3.9692 | -3.9692 |
| H | -7.7959 | -1.8277 | -1.8277 | C | -0.9630 | 0.9035  | 0.9035  | C                   | -0.5696      | -2.9822 | -2.9822 |
| C | -4.1544 | -3.4779 | -3.4779 | C | -1.3779 | 1.8680  | 1.8680  | C                   | -0.4556      | -2.4761 | -2.4761 |
| C | -4.7474 | -2.2601 | -2.2601 | C | -2.0274 | 1.4861  | 1.4861  | C                   | -1.2779      | -2.9506 | -2.9506 |
| C | -4.8205 | -1.8525 | -1.8525 | C | -2.2425 | 0.1291  | 0.1291  | C                   | -2.1976      | -3.9701 | -3.9701 |
| C | -4.3323 | -2.6712 | -2.6712 | C | -1.8214 | -0.8319 | -0.8319 | C                   | -2.3206      | -4.4685 | -4.4685 |
| C | -3.7308 | -3.8917 | -3.8917 | C | -1.1972 | -0.4438 | -0.4438 | H                   | -1.6187      | -4.3528 | -4.3528 |
| C | -3.6364 | -4.2888 | -4.2888 | H | -0.4498 | 1.2051  | 1.2051  | H                   | 0.0683       | -2.5827 | -2.5827 |
| H | -4.0854 | -3.7944 | -3.7944 | H | -1.1926 | 2.9275  | 2.9275  | H                   | 0.2656       | -1.6836 | -1.6836 |
| H | -5.1385 | -1.6100 | -1.6100 | H | -2.3625 | 2.2526  | 2.2526  | H                   | -2.8326      | -4.3636 | -4.3636 |
| H | -5.2234 | -0.8676 | -0.8676 | H | -1.9526 | -1.8920 | -1.8920 | H                   | -3.0470      | -5.2580 | -5.2580 |
| H | -3.3052 | -4.5173 | -4.5173 | H | -0.8720 | -1.2090 | -1.2090 |                     |              |         |         |
| H | -3.1527 | -5.2356 | -5.2356 | C | -3.0441 | -0.7199 | -0.7199 |                     |              |         |         |
| C | -6.6967 | 2.5434  | 2.5434  | C | -2.0996 | 0.2971  | 0.2971  | <b>Ph2P</b>         |              |         |         |
| C | -6.1673 | 1.9708  | 1.9708  | C | -1.7131 | 0.7210  | 0.7210  |                     |              |         |         |
| C | -5.0485 | 1.1465  | 1.1465  | C | -2.2700 | 0.1400  | 0.1400  | E:                  | -803.5357909 |         |         |
| C | -4.4261 | 0.8731  | 0.8731  | C | -3.2061 | -0.8867 | -0.8867 | $H_{\text{cont}}$ : | 0.19489848   |         |         |
| C | -4.9830 | 1.4377  | 1.4377  | C | -3.5934 | -1.3113 | -1.3113 | $G_{\text{cont}}$ : | 0.1460200    |         |         |
| C | -6.1011 | 2.2693  | 2.2693  | H | -3.3492 | -1.0600 | -1.0600 | $E_{\text{sp}}$ :   | -804.1373262 |         |         |
| H | -7.5724 | 3.1938  | 3.1938  | H | -1.6520 | 0.7657  | 0.7657  |                     |              |         |         |
| H | -6.6270 | 2.1690  | 2.1690  | H | -0.9668 | 1.5143  | 1.5143  | P                   | 2.2490       | 0.1305  | 0.1305  |
| H | -4.6554 | 0.7122  | 0.7122  | H | -3.6302 | -1.3828 | -1.3828 | C                   | 2.0526       | -1.5788 | -1.5788 |
| H | -4.5362 | 1.2379  | 1.2379  | H | -4.3200 | -2.1216 | -2.1216 | C                   | 1.1946       | -2.4313 | -2.4313 |
| H | -6.5094 | 2.7069  | 2.7069  | C | 3.2201  | -1.0953 | -1.0953 | C                   | 1.0079       | -3.7528 | -3.7528 |

|                                 |         |         |         |   |         |         |         |                 |         |        |        |
|---------------------------------|---------|---------|---------|---|---------|---------|---------|-----------------|---------|--------|--------|
| C                               | 1.6929  | -4.2535 | -4.2535 | H | -2.4296 | 3.9490  | 3.9490  | C               | 1.8536  | 1.0156 | 1.0156 |
| C                               | 2.5818  | -3.4318 | -3.4318 | H | -1.4523 | 3.4300  | 3.4300  | C               | 2.1968  | 1.2617 | 1.2617 |
| C                               | 2.7622  | -2.1081 | -2.1081 | H | 4.7260  | -1.7678 | -1.7678 | C               | 2.4822  | 2.5592 | 2.5592 |
| H                               | 3.4551  | -1.4707 | -1.4707 | H | 3.6339  | -2.9798 | -2.9798 | C               | 2.4189  | 3.6112 | 3.6112 |
| H                               | 0.6545  | -2.0438 | -2.0438 | H | 1.4612  | -2.1564 | -2.1564 | C               | 2.0852  | 3.3663 | 3.3663 |
| H                               | 0.3219  | -4.3959 | -4.3959 | H | 0.4134  | -0.1214 | -0.1214 | H               | 2.0414  | 4.1949 | 4.1949 |
| H                               | 1.5318  | -5.2846 | -5.2846 | H | 1.6107  | -0.0022 | -0.0022 | H               | 1.3918  | 5.5779 | 5.5779 |
| H                               | 3.1350  | -3.8260 | -3.8260 | H | 2.2391  | 0.4309  | 0.4309  | H               | -0.0138 | 5.7856 | 5.7856 |
| C                               | 2.1810  | 1.1056  | 1.1056  | H | 2.7577  | 2.7517  | 2.7517  | H               | -0.5583 | 3.7663 | 3.7663 |
| C                               | 1.6480  | 0.6637  | 0.6637  | H | 2.6365  | 4.6310  | 4.6310  | H               | 0.3052  | 1.5399 | 1.5399 |
| C                               | 2.6208  | 2.4430  | 2.4430  | H | -3.4149 | -0.4974 | -0.4974 | H               | 1.7181  | 1.3383 | 1.3383 |
| C                               | 2.5542  | 3.2929  | 3.2929  | C | -2.5932 | -1.2183 | -1.2183 | H               | 4.7378  | 2.8174 | 2.8174 |
| C                               | 2.0387  | 2.8328  | 2.8328  | C | -2.8737 | -2.5622 | -2.5622 | H               | 6.8364  | 1.5103 | 1.5103 |
| C                               | 1.5816  | 1.5173  | 1.5173  | C | -1.8357 | -3.4913 | -3.4913 | H               | 7.4255  | 0.4291 | 0.4291 |
| H                               | 1.2665  | -0.3549 | -0.3549 | C | -0.5210 | -3.0595 | -3.0595 | H               | 5.9238  | 0.7058 | 0.7058 |
| H                               | 3.0289  | 2.8109  | 2.8109  | C | -0.2399 | -1.7146 | -1.7146 | H               | 3.8336  | 2.0147 | 2.0147 |
| H                               | 2.9127  | 4.3211  | 4.3211  | C | -1.2714 | -0.7725 | -0.7725 | C               | 1.1541  | 4.6922 | 4.6922 |
| H                               | 1.9858  | 3.5013  | 3.5013  | H | -2.2017 | -0.7666 | -0.7666 | C               | 0.3687  | 4.8086 | 4.8086 |
| H                               | 1.1544  | 1.1541  | 1.1541  | C | -2.2482 | 0.2715  | 0.2715  | C               | 0.0661  | 3.6776 | 3.6776 |
|                                 |         |         |         | C | -2.8017 | 0.5689  | 0.5689  | C               | 0.5536  | 2.4321 | 2.4321 |
|                                 |         |         |         | C | -2.8745 | 1.8879  | 1.8879  | C               | 1.3426  | 2.3176 | 2.3176 |
| <b>ts2-PhPh</b>                 |         |         |         | C | -2.3853 | 2.9135  | 2.9135  | C               | 4.9957  | 2.3458 | 2.3458 |
|                                 |         |         |         | C | -1.8348 | 2.6203  | 2.6203  | C               | 6.1718  | 1.6127 | 1.6127 |
| E: -2410.708661                 |         |         |         | C | -1.7599 | 1.2943  | 1.2943  | C               | 6.5038  | 1.0077 | 1.0077 |
| $H_{\text{cont}}$ : 0.58806998  |         |         |         | P | -1.0445 | 1.0463  | 1.0463  | C               | 5.6572  | 1.1609 | 1.1609 |
| $G_{\text{cont}}$ : 0.494042812 |         |         |         | H | 3.6884  | 0.2672  | 0.2672  | C               | 4.4756  | 1.8906 | 1.8906 |
| $E_{\text{sp}}$ : -2412.509492  |         |         |         | C | 3.1968  | -0.2579 | -0.2579 | C               | 4.1124  | 2.4763 | 2.4763 |
|                                 |         |         |         | C | 3.7813  | -1.4062 | -1.4062 | P               | 2.5954  | 3.4248 | 3.4248 |
| H                               | -3.9087 | -2.8882 | -2.8882 | C | 3.1685  | -2.0858 | -2.0858 | C               | 1.6552  | 3.4470 | 3.4470 |
| H                               | -2.0545 | -4.5458 | -4.5458 | C | 1.9591  | -1.6179 | -1.6179 |                 |         |        |        |
| H                               | 0.3028  | -3.7740 | -3.7740 | C | 1.3713  | -0.4729 | -0.4729 |                 |         |        |        |
| H                               | 0.7971  | -1.4087 | -1.4087 | C | 1.9908  | 0.2271  | 0.2271  | <b>oTol2P</b>   |         |        |        |
| H                               | -3.1849 | -0.2408 | -0.2408 | P | 1.2039  | 1.7840  | 1.7840  |                 |         |        |        |
| H                               | -3.3129 | 2.1199  | 2.1199  | C | 1.8102  | 2.0639  | 2.0639  | E: -882.0219441 |         |        |        |



|                                |                                |   |         |         |         |
|--------------------------------|--------------------------------|---|---------|---------|---------|
| $H_{\text{cont}}$ : 0.25300362 |                                | C | 2.5836  | 3.0518  | 3.0518  |
| $G_{\text{cont}}$ : 0.19669777 | <b>ts2-oToloTol</b>            | C | 2.8869  | 1.7661  | 1.7661  |
| $E_{\text{sp}}$ : -882.7053332 |                                | C | 2.4528  | 1.3532  | 1.3532  |
|                                | $E$ : -2646.171457             | C | 1.7433  | 2.2134  | 2.2134  |
| P 0.8296 0.0476 0.0476         | $H_{\text{cont}}$ : 0.7631705  | P | 1.1867  | 1.6470  | 1.6470  |
| C 1.5318 -1.5935 -1.5935       | $G_{\text{cont}}$ : 0.65042506 | C | 2.0975  | 0.0935  | 0.0935  |
| C 1.4862 -2.5352 -2.5352       | $E_{\text{sp}}$ : -2648.215005 | C | 1.2859  | -0.8453 | -0.8453 |
| C 1.9331 -3.8362 -3.8362       |                                | C | 1.8028  | -2.0054 | -2.0054 |
| C 2.4275 -4.2253 -4.2253       | C 1.3144 3.0723 3.0723         | C | 3.1673  | -2.2676 | -2.2676 |
| C 2.5082 -3.2945 -3.2945       | P 2.2296 3.4110 3.4110         | C | 3.9765  | -1.3592 | -1.3592 |
| C 2.0757 -1.9904 -1.9904       | C 3.9413 2.9895 2.9895         | C | 3.4842  | -0.1636 | -0.1636 |
| H 2.1628 -1.2544 -1.2544       | C 4.2769 2.0954 2.0954         | C | 4.5042  | 0.7297  | 0.7297  |
| H 1.9013 -4.5609 -4.5609       | C 5.6041 1.7980 1.7980         | P | -1.0287 | 1.0791  | 1.0791  |
| H 2.7731 -5.2504 -5.2504       | C 6.6246 2.4089 2.4089         | C | -1.8555 | 0.6588  | 0.6588  |
| H 2.9243 -3.5859 -3.5859       | C 6.3037 3.3085 3.3085         | C | -2.1528 | 1.7046  | 1.7046  |
| C 1.5229 1.0520 1.0520         | C 4.9782 3.6045 3.6045         | C | -2.7558 | 1.3839  | 1.3839  |
| C 0.9319 1.1653 1.1653         | C 0.8953 1.7917 1.7917         | C | -3.0838 | 0.0742  | 0.0742  |
| C 2.6337 1.8468 1.8468         | C 0.1697 1.5855 1.5855         | C | -2.8238 | -0.9513 | -0.9513 |
| C 3.1830 2.7289 2.7289         | C -0.1594 2.6726 2.6726        | C | -2.2177 | -0.6571 | -0.6571 |
| C 2.6127 2.8305 2.8305         | C 0.2442 3.9525 3.9525         | H | -2.0130 | -1.4626 | -1.4626 |
| C 1.5014 2.0547 2.0547         | C 0.9823 4.1798 4.1798         | C | -1.0954 | -0.5113 | -0.5113 |
| H 3.0730 1.7732 1.7732         | H 3.4804 1.6288 1.6288         | C | 0.0553  | -1.2636 | -1.2636 |
| H 4.0500 3.3353 3.3353         | H 5.8436 1.0936 1.0936         | C | 0.0094  | -2.4031 | -2.4031 |
| H 3.0292 3.5172 3.5172         | H 7.6698 2.1854 2.1854         | C | -1.2044 | -2.8172 | -2.8172 |
| H 1.0533 2.1466 2.1466         | H 7.1037 3.7920 3.7920         | C | -2.3556 | -2.0758 | -2.0758 |
| C 1.0077 -2.1460 -2.1460       | C 4.6611 4.5420 4.5420         | C | -2.3280 | -0.9168 | -0.9168 |
| H 1.0974 -2.9890 -2.9890       | H 1.1384 0.9347 0.9347         | C | -3.5929 | -0.1453 | -0.1453 |
| H 1.5942 -1.3054 -1.3054       | H -0.1531 0.5780 0.5780        | H | 1.5297  | 4.8771  | 4.8771  |
| H -0.0434 -1.8127 -1.8127      | H -0.7392 2.5285 2.5285        | H | 2.9264  | 3.3971  | 3.3971  |
| C -0.2807 0.3635 0.3635        | H -0.0243 4.8066 4.8066        | H | 3.4531  | 1.0790  | 1.0790  |
| H -1.0885 0.4988 0.4988        | C 1.4027 5.5798 5.5798         | H | 2.6761  | 0.3400  | 0.3400  |
| H -0.6641 0.6617 0.6617        | C 0.5325 4.4438 4.4438         | H | 0.2167  | -0.6506 | -0.6506 |
| H -0.0588 -0.7159 -0.7159      | C 1.3771 3.4953 3.4953         | H | 1.1381  | -2.7009 | -2.7009 |
|                                | C 1.8163 3.8876 3.8876         | H | 3.6009  | -3.1726 | -3.1726 |

|                         |         |         |         |                         |         |         |         |                         |         |         |         |
|-------------------------|---------|---------|---------|-------------------------|---------|---------|---------|-------------------------|---------|---------|---------|
| H                       | 5.0476  | -1.5615 | -1.5615 | $E_{sp}$ : -1765.497759 | C       | 1.2581  | 0.9537  | 0.9537                  |         |         |         |
| C                       | -1.8401 | 3.1362  | 3.1362  |                         | C       | 1.0475  | 1.2014  | 1.2014                  |         |         |         |
| H                       | -2.9717 | 2.1929  | 2.1929  | P                       | -1.2427 | -1.0293 | -1.0293 | C                       | 1.7551  | 1.9819  | 1.9819  |
| H                       | -3.5567 | -0.1445 | -0.1445 | P                       | 0.9073  | -0.6001 | -0.6001 | C                       | 2.0245  | 3.2501  | 3.2501  |
| H                       | -3.0992 | -1.9812 | -1.9812 | C                       | -2.0772 | -1.2605 | -1.2605 | C                       | 1.7964  | 3.5035  | 3.5035  |
| H                       | 1.0036  | -0.9589 | -0.9589 | C                       | -1.8777 | 0.6360  | 0.6360  | C                       | 1.3177  | 2.4880  | 2.4880  |
| H                       | 0.9235  | -2.9686 | -2.9686 | C                       | 1.8290  | -1.8826 | -1.8826 | H                       | 2.4085  | 4.0324  | 4.0324  |
| H                       | -1.2597 | -3.7153 | -3.7153 | C                       | -1.4044 | -1.3167 | -1.3167 | H                       | 1.9979  | 4.4925  | 4.4925  |
| H                       | -3.3086 | -2.3973 | -2.3973 | C                       | -2.0931 | -1.5040 | -1.5040 | H                       | 1.1322  | 2.6981  | 2.6981  |
| H                       | 4.0380  | 5.3818  | 5.3818  | C                       | -3.4788 | -1.6446 | -1.6446 | C                       | -1.3656 | 1.8206  | 1.8206  |
| H                       | 5.5756  | 4.9488  | 4.9488  | C                       | -4.1537 | -1.6175 | -1.6175 | H                       | -0.5283 | 1.1336  | 1.1336  |
| H                       | 4.0830  | 4.0399  | 4.0399  | C                       | -3.4807 | -1.4350 | -1.4350 | H                       | -1.0446 | 2.8295  | 2.8295  |
| H                       | 0.8943  | 6.3128  | 6.3128  | H                       | -0.3194 | -1.1757 | -1.1757 | H                       | -2.1728 | 1.5038  | 1.5038  |
| H                       | 2.4896  | 5.7141  | 5.7141  | H                       | -1.5440 | -1.5335 | -1.5335 | C                       | -4.2641 | -1.4307 | -1.4307 |
| H                       | 1.1775  | 5.8185  | 5.8185  | H                       | -4.0358 | -1.7906 | -1.7906 | H                       | -5.2313 | -1.9353 | -1.9353 |
| H                       | -0.1438 | 3.9076  | 3.9076  | H                       | -5.2385 | -1.7565 | -1.7565 | H                       | -4.4600 | -0.4064 | -0.4064 |
| H                       | 1.1559  | 5.1038  | 5.1038  | C                       | -1.8419 | 1.8048  | 1.8048  | H                       | -3.7126 | -1.9422 | -1.9422 |
| H                       | -0.0808 | 5.0677  | 5.0677  | C                       | -2.4406 | 0.6942  | 0.6942  | C                       | 0.6048  | -3.7039 | -3.7039 |
| H                       | 5.3433  | 0.8908  | 0.8908  | C                       | -2.9242 | 1.8845  | 1.8845  | H                       | 0.5693  | -3.0330 | -3.0330 |
| H                       | 4.9100  | 0.2580  | 0.2580  | C                       | -2.8460 | 3.0477  | 3.0477  | H                       | -0.4102 | -3.7272 | -3.7272 |
| H                       | 4.1076  | 1.7068  | 1.7068  | C                       | -2.3183 | 2.9960  | 2.9960  | H                       | 0.8415  | -4.7130 | -4.7130 |
| H                       | -2.3598 | 3.8132  | 3.8132  | H                       | -2.4952 | -0.2241 | -0.2241 | C                       | 0.5808  | 0.1627  | 0.1627  |
| H                       | -0.7616 | 3.3363  | 3.3363  | H                       | -3.3574 | 1.9021  | 1.9021  | H                       | 0.0836  | -0.6872 | -0.6872 |
| H                       | -2.1285 | 3.3921  | 3.3921  | H                       | -3.2094 | 3.9950  | 3.9950  | H                       | -0.1157 | 0.6059  | 0.6059  |
| H                       | -3.4269 | 0.9372  | 0.9372  | H                       | -2.2692 | 3.9107  | 3.9107  | H                       | 1.4322  | -0.2519 | -0.2519 |
| H                       | -4.3817 | -0.4642 | -0.4642 | C                       | 1.6193  | -3.2497 | -3.2497 | H                       | 1.9287  | 1.7693  | 1.7693  |
| H                       | -3.9671 | -0.2870 | -0.2870 | C                       | 2.3925  | -4.2005 | -4.2005 |                         |         |         |         |
|                         |         |         |         | C                       | 3.3761  | -3.8319 | -3.8319 | <b>PMe2P</b>            |         |         |         |
|                         |         |         |         | C                       | 3.6183  | -2.4816 | -2.4816 |                         |         |         |         |
| <b>int0-oToloTol</b>    |         |         |         | C                       | 2.8527  | -1.5193 | -1.5193 | E: -420.7533951         |         |         |         |
|                         |         |         |         | H                       | 3.0589  | -0.4627 | -0.4627 | $H_{cont}$ : 0.07959972 |         |         |         |
| E: -1764.134043         |         |         |         | H                       | 2.2171  | -5.2589 | -5.2589 | $G_{cont}$ : 0.04557994 |         |         |         |
| $H_{cont}$ : 0.50977602 |         |         |         | H                       | 3.9652  | -4.5974 | -4.5974 | $E_{sp}$ : -420.9606427 |         |         |         |
| $G_{cont}$ : 0.42703577 |         |         |         | H                       | 4.4062  | -2.1701 | -2.1701 |                         |         |         |         |

C 3. 6598 2. 7219 2. 7219  
 P 3. 9366 1. 3241 1. 3241  
 C 4. 6605 0. 1102 0. 1102  
 H 2. 9719 2. 4302 2. 4302  
 H 4. 6070 3. 0456 3. 0456  
 H 3. 2233 3. 5810 3. 5810  
 H 4. 9030 -0. 8290 -0. 8290  
 H 5. 5852 0. 5034 0. 5034  
 H 3. 9551 -0. 1162 -0. 1162

**int2-MeMe**

E: -1262. 372703

 $H_{\text{cont}}$ : 0. 24503998 $G_{\text{cont}}$ : 0. 18405438 $E_{\text{sp}}$ : -1262. 994834

C 3. 6505 2. 7295 2. 7295  
 P 4. 0188 1. 3556 1. 3556  
 C 4. 6592 0. 0987 0. 0987  
 H 2. 9817 2. 4072 2. 4072  
 H 4. 5916 3. 0972 3. 0972  
 H 3. 1809 3. 5699 3. 5699  
 H 4. 8636 -0. 8486 -0. 8486  
 H 5. 6087 0. 4539 0. 4539  
 H 3. 9472 -0. 0920 -0. 0920  
 P 1. 7972 0. 4991 0. 4991  
 P -0. 3070 -0. 3164 -0. 3164  
 C 2. 1547 -0. 9022 -0. 9022  
 C 1. 1206 1. 7697 1. 7697  
 C -0. 6277 1. 0802 1. 0802  
 C 0. 3972 -1. 5460 -1. 5460  
 H 0. 8659 2. 6830 2. 6830

H 1. 8701 2. 0219 2. 0219  
 H 0. 2110 1. 3902 1. 3902  
 H 2. 5690 -1. 7494 -1. 7494  
 H 1. 2296 -1. 2301 -1. 2301  
 H 2. 8898 -0. 5932 -0. 5932  
 H -1. 4089 0. 7850 0. 7850  
 H 0. 2774 1. 3702 1. 3702  
 H -0. 9984 1. 9561 1. 9561  
 H -0. 3844 -1. 8552 -1. 8552  
 H 0. 7289 -2. 4455 -2. 4455  
 H 1. 2503 -1. 1359 -1. 1359

**ts2-MeMe**

E: -1262. 370439

 $H_{\text{cont}}$ : 0. 24404243 $G_{\text{cont}}$ : 0. 1838426 $E_{\text{sp}}$ : -1262. 990737

C 3. 7777 2. 7353 2. 7353  
 P 4. 0576 1. 3479 1. 3479  
 C 4. 7620 0. 0943 0. 0943  
 H 3. 2040 2. 4233 2. 4233  
 H 4. 7535 3. 1257 3. 1257  
 H 3. 2446 3. 5570 3. 5570  
 H 4. 9520 -0. 8481 -0. 8481  
 H 5. 7287 0. 4633 0. 4633  
 H 4. 1016 -0. 1042 -0. 1042  
 P 1. 9217 0. 5526 0. 5526  
 P -0. 4871 -0. 4069 -0. 4069  
 C 2. 2487 -0. 8384 -0. 8384  
 C 1. 2441 1. 8187 1. 8187  
 C -0. 9315 0. 9692 0. 9692

C 0. 2501 -1. 5530 -1. 5530  
 H 1. 0973 2. 7723 2. 7723  
 H 1. 9200 1. 9833 1. 9833  
 H 0. 2685 1. 4760 1. 4760  
 H 2. 8079 -1. 6365 -1. 6365  
 H 1. 2903 -1. 2538 -1. 2538  
 H 2. 8309 -0. 4982 -0. 4982  
 H -1. 6319 0. 5991 0. 5991  
 H -0. 0457 1. 3714 1. 3714  
 H -1. 4238 1. 7894 1. 7894  
 H -0. 5093 -1. 8440 -1. 8440  
 H 0. 6204 -2. 4697 -2. 4697  
 H 1. 0853 -1. 0733 -1. 0733

**o'-BuPh2P**

E: -1117. 442261

 $H_{\text{cont}}$ : 0. 43033184 $G_{\text{cont}}$ : 0. 36101732 $E_{\text{sp}}$ : -1118. 372327

C 1. 6867 3. 5702 3. 5702  
 P 2. 5966 3. 4151 3. 4151  
 C 4. 2536 2. 8248 2. 8248  
 C 4. 2258 1. 9015 1. 9015  
 C 5. 3685 1. 3063 1. 3063  
 C 6. 6014 1. 6395 1. 6395  
 C 6. 6494 2. 5515 2. 5515  
 C 5. 5100 3. 1660 3. 1660  
 C 0. 8662 2. 4628 2. 4628  
 C 0. 0728 2. 3974 2. 3974  
 C 0. 0798 3. 4742 3. 4742  
 C 0. 8538 4. 5968 4. 5968

|   |         |        |        |   |         |         |         |   |         |         |         |
|---|---------|--------|--------|---|---------|---------|---------|---|---------|---------|---------|
| C | 1.6639  | 4.6956 | 4.6956 | H | 1.9223  | 5.9206  | 5.9206  | C | -0.6340 | -1.6106 | -1.6106 |
| H | 3.2649  | 1.6464 | 1.6464 |   |         |         |         | C | -0.2259 | -2.6156 | -2.6156 |
| H | 5.2936  | 0.5962 | 0.5962 |   |         |         |         | C | -0.5420 | -2.5002 | -2.5002 |
| H | 7.5229  | 1.1973 | 1.1973 |   |         |         |         | C | -1.2983 | -1.4179 | -1.4179 |
| H | 7.6284  | 2.8157 | 2.8157 |   |         |         |         | C | -1.7412 | -0.3929 | -0.3929 |
| C | 5.8107  | 4.2052 | 4.2052 |   |         |         |         | C | -2.6446 | 0.7156  | 0.7156  |
| H | 0.8557  | 1.6242 | 1.6242 |   |         |         |         | H | 1.6067  | 4.3626  | 4.3626  |
| H | -0.5419 | 1.5162 | 1.5162 |   |         |         |         | H | 2.1486  | 2.4541  | 2.4541  |
| H | -0.5271 | 3.4551 | 3.4551 |   |         |         |         | H | 1.9010  | 0.1206  | 0.1206  |
| H | 0.8039  | 5.4355 | 5.4355 |   |         |         |         | H | 1.1751  | -0.1889 | -0.1889 |
| C | 2.3788  | 6.0284 | 6.0284 | C | 0.7756  | 4.5186  | 4.5186  | H | -0.3146 | -0.2526 | -0.2526 |
| C | 4.5952  | 4.8521 | 4.8521 | C | 1.0554  | 3.2336  | 3.2336  | H | 0.3514  | -2.3489 | -2.3489 |
| C | 6.6483  | 5.3383 | 5.3383 | C | 1.4921  | 3.3670  | 3.3670  | H | 2.5188  | -3.4416 | -3.4416 |
| C | 6.6096  | 3.5430 | 3.5430 | C | 1.7993  | 2.2804  | 2.2804  | H | 4.0128  | -2.2215 | -2.2215 |
| C | 2.1690  | 7.0662 | 7.0662 | C | 1.6674  | 0.9913  | 0.9913  | C | -2.6385 | 2.1407  | 2.1407  |
| C | 3.8980  | 5.8784 | 5.8784 | C | 1.2452  | 0.8212  | 0.8212  | H | -4.1673 | 0.3791  | 0.3791  |
| C | 1.7799  | 6.6032 | 6.6032 | C | 0.9478  | 1.9055  | 1.9055  | H | -5.0040 | -1.8207 | -1.8207 |
| H | 7.4924  | 2.9940 | 2.9940 | P | 0.5313  | 1.5264  | 1.5264  | H | -4.3463 | -2.8241 | -2.8241 |
| H | 5.9745  | 2.8418 | 2.8418 | C | 1.4604  | 0.0121  | 0.0121  | H | -0.3749 | -1.7027 | -1.7027 |
| H | 6.9530  | 4.3139 | 4.3139 | C | 0.6615  | -0.6680 | -0.6680 | H | 0.3469  | -3.4629 | -3.4629 |
| H | 6.0843  | 5.8539 | 5.8539 | C | 1.0212  | -1.8706 | -1.8706 | H | -0.2152 | -3.2577 | -3.2577 |
| H | 7.5837  | 4.9709 | 4.9709 | C | 2.2171  | -2.4658 | -2.4658 | H | -1.5531 | -1.3739 | -1.3739 |
| H | 6.9063  | 6.0803 | 6.0803 | C | 3.0539  | -1.7677 | -1.7677 | C | -0.6405 | 4.4992  | 4.4992  |
| H | 3.9901  | 5.4388 | 5.4388 | C | 2.7690  | -0.4883 | -0.4883 | C | 1.8141  | 4.6597  | 4.6597  |
| H | 4.9483  | 5.5451 | 5.5451 | C | 3.9863  | 0.2098  | 0.2098  | C | 0.8707  | 5.7842  | 5.7842  |
| H | 3.9405  | 4.1130 | 4.1130 | P | -1.6008 | 0.9139  | 0.9139  | C | 5.1637  | 0.1274  | 0.1274  |
| H | 4.4314  | 5.7204 | 5.7204 | C | -2.5503 | 0.1082  | 0.1082  | C | 4.3806  | -0.4941 | -0.4941 |
| H | 4.1669  | 5.0530 | 5.0530 | C | -2.9858 | 0.7164  | 0.7164  | C | 3.7974  | 1.6996  | 1.6996  |
| H | 4.3035  | 6.8049 | 6.8049 | C | -3.8384 | -0.0418 | -0.0418 | C | -3.4007 | 2.5257  | 2.5257  |
| H | 2.5678  | 6.7151 | 6.7151 | C | -4.3278 | -1.2993 | -1.2993 | C | -1.1498 | 2.2569  | 2.2569  |
| H | 2.7122  | 7.9854 | 7.9854 | C | -3.9584 | -1.8562 | -1.8562 | C | -3.0468 | 3.1590  | 3.1590  |
| H | 1.1121  | 7.3383 | 7.3383 | C | -3.0779 | -1.1575 | -1.1575 | C | -1.9465 | 2.0823  | 2.0823  |
| H | 0.6993  | 6.7804 | 6.7804 | H | -2.8015 | -1.6174 | -1.6174 | C | -3.0278 | 0.4413  | 0.4413  |
| H | 2.2629  | 7.5606 | 7.5606 | C | -1.3490 | -0.4800 | -0.4800 | C | -3.9510 | 0.7705  | 0.7705  |

**int0-o-tBuPh2P**

E: -2234.969569

 $H_{\text{cont}}$ : 0.86399712 $G_{\text{cont}}$ : 0.75550631 $E_{\text{sp}}$ : -2236.825381

|   |         |         |         |                                                            |              |         |         |   |         |         |         |
|---|---------|---------|---------|------------------------------------------------------------|--------------|---------|---------|---|---------|---------|---------|
| H | 1.6649  | 5.6107  | 5.6107  | H                                                          | 3.5578       | -0.4666 | -0.4666 | C | 1.6331  | 3.7021  | 3.7021  |
| H | 1.7323  | 3.8466  | 3.8466  | H                                                          | 5.2477       | 0.0119  | 0.0119  | C | 1.8850  | 2.1857  | 2.1857  |
| H | 2.8331  | 4.6584  | 4.6584  |                                                            |              |         |         | C | 2.3108  | 1.6110  | 1.6110  |
| H | -0.8093 | 5.3918  | 5.3918  |                                                            |              |         |         | C | 2.5049  | 0.2497  | 0.2497  |
| H | -1.3952 | 4.4890  | 4.4890  | <b>ts2-<i>o</i>-<sup>t</sup>BuPh2Po-<sup>t</sup>BuPh2P</b> |              |         |         | C | 2.2749  | -0.6104 | -0.6104 |
| H | -0.8124 | 3.6232  | 3.6232  |                                                            |              |         |         | C | 1.9232  | -0.0662 | -0.0662 |
| H | 0.5825  | 6.6471  | 6.6471  | E:                                                         | -3352.42102  |         |         | C | 1.7458  | 1.3117  | 1.3117  |
| H | 1.8903  | 5.9697  | 5.9697  | $H_{\text{cont}}$ :                                        | 1.29667454   |         |         | P | 1.2164  | 1.6974  | 1.6974  |
| H | 0.1874  | 5.7551  | 5.7551  | $G_{\text{cont}}$ :                                        | 1.14367999   |         |         | C | 1.7783  | 0.2737  | 0.2737  |
| H | -0.8591 | 1.4940  | 1.4940  | $E_{\text{sp}}$ :                                          | -3355.199606 |         |         | C | 0.7402  | 0.0687  | 0.0687  |
| H | -0.5036 | 2.1510  | 2.1510  |                                                            |              |         |         | C | 0.7828  | -0.8756 | -0.8756 |
| H | -0.9385 | 3.2468  | 3.2468  | C                                                          | 1.3821       | 4.2698  | 4.2698  | C | 1.8980  | -1.7015 | -1.7015 |
| H | -3.1179 | 1.9034  | 1.9034  | P                                                          | 2.7044       | 3.6104  | 3.6104  | C | 2.9331  | -1.5095 | -1.5095 |
| H | -3.1488 | 3.5658  | 3.5658  | C                                                          | 3.9170       | 2.9328  | 2.9328  | C | 2.9590  | -0.5162 | -0.5162 |
| H | -4.4925 | 2.4707  | 2.4707  | C                                                          | 3.3845       | 2.1069  | 2.1069  | C | 4.2995  | -0.4827 | -0.4827 |
| H | -4.1421 | 3.1827  | 3.1827  | C                                                          | 4.1312       | 1.6040  | 1.6040  | P | -1.2264 | 1.0111  | 1.0111  |
| H | -2.7015 | 4.1663  | 4.1663  | C                                                          | 5.4787       | 1.9409  | 1.9409  | C | -2.3113 | 0.8360  | 0.8360  |
| H | -2.6282 | 2.9228  | 2.9228  | C                                                          | 6.0329       | 2.7235  | 2.7235  | C | -2.9470 | 1.9598  | 1.9598  |
| H | -1.7521 | 2.4143  | 2.4143  | C                                                          | 5.3152       | 3.2159  | 3.2159  | C | -3.6646 | 1.7121  | 1.7121  |
| H | -0.9875 | 2.0541  | 2.0541  | C                                                          | 0.5494       | 3.3379  | 3.3379  | C | -3.8630 | 0.4364  | 0.4364  |
| H | -2.5876 | 2.8360  | 2.8360  | C                                                          | -0.4407      | 3.6878  | 3.6878  | C | -3.3510 | -0.6615 | -0.6615 |
| H | -3.7765 | 1.0634  | 1.0634  | C                                                          | -0.6405      | 5.0308  | 5.0308  | C | -2.5785 | -0.4489 | -0.4489 |
| H | -4.6330 | 1.5142  | 1.5142  | C                                                          | 0.1433       | 5.9815  | 5.9815  | H | -2.1759 | -1.3169 | -1.3169 |
| H | -4.4588 | -0.2060 | -0.2060 | C                                                          | 1.1576       | 5.6548  | 5.6548  | C | -1.0288 | -0.7180 | -0.7180 |
| H | -3.7254 | 1.2222  | 1.2222  | H                                                          | 2.3330       | 1.8380  | 1.8380  | C | -0.3426 | -1.6612 | -1.6612 |
| H | -2.1554 | 0.4702  | 0.4702  | H                                                          | 3.6573       | 0.9619  | 0.9619  | C | 0.0756  | -2.8901 | -2.8901 |
| H | -3.5356 | -0.5275 | -0.5275 | H                                                          | 6.1033       | 1.5841  | 1.5841  | C | -0.1922 | -3.1997 | -3.1997 |
| H | 4.9104  | 0.6374  | 0.6374  | H                                                          | 7.0943       | 2.9641  | 2.9641  | C | -0.9198 | -2.3041 | -2.3041 |
| H | 5.4604  | -0.9005 | -0.9005 | C                                                          | 6.1962       | 3.9972  | 3.9972  | C | -1.3706 | -1.0659 | -1.0659 |
| H | 6.0416  | 0.6303  | 0.6303  | H                                                          | 0.6604       | 2.2841  | 2.2841  | C | -2.2290 | -0.1813 | -0.1813 |
| H | 3.4012  | 2.2175  | 2.2175  | H                                                          | -1.0547      | 2.9111  | 2.9111  | H | 2.4842  | 2.2662  | 2.2662  |
| H | 4.7714  | 2.1513  | 2.1513  | H                                                          | -1.4100      | 5.3520  | 5.3520  | H | 2.8268  | -0.1324 | -0.1324 |
| H | 3.1393  | 1.9009  | 1.9009  | H                                                          | -0.0471      | 7.0293  | 7.0293  | H | 2.3892  | -1.6915 | -1.6915 |
| H | 4.6581  | -1.5465 | -1.5465 | C                                                          | 1.9620       | 6.8067  | 6.8067  | H | 1.8040  | -0.7419 | -0.7419 |



|   |         |         |         |                     |              |         |         |   |         |         |         |
|---|---------|---------|---------|---------------------|--------------|---------|---------|---|---------|---------|---------|
| C | 3.4988  | -0.2898 | -0.2898 | H                   | -4.5588      | -2.6503 | -2.6503 | C | 4.2749  | -1.0146 | -1.0146 |
| C | 4.3626  | -0.3118 | -0.3118 | H                   | -2.1465      | -2.6022 | -2.6022 | C | 3.1966  | -1.9005 | -1.9005 |
| C | 4.1131  | -1.1601 | -1.1601 | H                   | -0.4245      | -2.1641 | -2.1641 | C | 2.3211  | -1.9103 | -1.9103 |
| C | 2.9980  | -1.9968 | -1.9968 | CI                  | -1.5035      | -2.8931 | -2.8931 | C | -1.1780 | -0.1055 | -0.1055 |
| C | 2.1318  | -1.9788 | -1.9788 |                     |              |         |         | C | -0.5345 | 0.2019  | 0.2019  |
| C | -1.1309 | 0.0073  | 0.0073  |                     |              |         |         | C | -0.5740 | 1.4953  | 1.4953  |
| C | -0.6365 | 0.3580  | 0.3580  | <b>CI</b>           |              |         |         | C | -1.2702 | 2.4927  | 2.4927  |
| C | -0.9096 | 1.6165  | 1.6165  |                     |              |         |         | C | -1.9079 | 2.1939  | 2.1939  |
| C | -1.7014 | 2.5173  | 2.5173  | E:                  | -459.8385799 |         |         | C | -1.8545 | 0.9038  | 0.9038  |
| C | -2.2024 | 2.1654  | 2.1654  | $H_{\text{cont}}$ : | 0.005193105  |         |         | C | -1.9628 | -1.9727 | -1.9727 |
| C | -1.9101 | 0.9178  | 0.9178  | $G_{\text{cont}}$ : | -0.012209447 |         |         | C | -3.2973 | -1.5543 | -1.5543 |
| C | -1.8550 | -1.9528 | -1.9528 | $E_{\text{sp}}$ :   | -459.9974297 |         |         | C | -3.9852 | -1.6797 | -1.6797 |
| C | -3.2121 | -2.0245 | -2.0245 |                     |              |         |         | C | -3.3634 | -2.2525 | -2.2525 |
| C | -4.1749 | -2.2690 | -2.2690 | CI                  | 0.0000       | 0.0000  | 0.0000  | C | -2.0549 | -2.7201 | -2.7201 |
| C | -3.7992 | -2.4612 | -2.4612 |                     |              |         |         | C | -1.3588 | -2.5817 | -2.5817 |
| C | -2.4510 | -2.4284 | -2.4284 |                     |              |         |         | H | -0.0044 | -0.2059 | -0.2059 |
| C | -1.4803 | -2.1796 | -2.1796 | <b>ts2-CIPh</b>     |              |         |         | H | -0.8108 | 2.0152  | 2.0152  |
| H | 0.6545  | 0.0459  | 0.0459  |                     |              |         |         | H | -0.2896 | 4.0388  | 4.0388  |
| H | 0.2071  | 2.3662  | 2.3662  | E:                  | -2067.051076 |         |         | H | 1.0271  | 3.8064  | 3.8064  |
| H | 0.4365  | 4.2588  | 4.2588  | $H_{\text{cont}}$ : | 0.394704217  |         |         | H | 1.7714  | 1.5864  | 1.5864  |
| H | 1.0965  | 3.8086  | 3.8086  | $G_{\text{cont}}$ : | 0.318826497  |         |         | H | 3.7909  | 0.5118  | 0.5118  |
| H | 1.4908  | 1.4928  | 1.4928  | $E_{\text{sp}}$ :   | -2068.41369  |         |         | H | 5.3322  | 0.5326  | 0.5326  |
| H | 3.7142  | 0.3768  | 0.3768  |                     |              |         |         | H | 4.9598  | -1.0010 | -1.0010 |
| H | 5.2419  | 0.3369  | 0.3369  | P                   | -0.9838      | -1.8369 | -1.8369 | H | 3.0276  | -2.5879 | -2.5879 |
| H | 4.7875  | -1.1682 | -1.1682 | P                   | 1.4184       | -1.1733 | -1.1733 | H | 1.4725  | -2.5995 | -2.5995 |
| H | 2.7833  | -2.6690 | -2.6690 | C                   | 0.9828       | 0.5285  | 0.5285  | H | 0.0023  | -0.5799 | -0.5799 |
| H | 1.2551  | -2.6322 | -2.6322 | C                   | 0.2368       | 0.6770  | 0.6770  | H | -0.0597 | 1.7248  | 1.7248  |
| H | -0.0517 | -0.3656 | -0.3656 | C                   | -0.2227      | 1.9245  | 1.9245  | H | -1.3090 | 3.5069  | 3.5069  |
| H | -0.5126 | 1.8892  | 1.8892  | C                   | 0.0701       | 3.0588  | 3.0588  | H | -2.4397 | 2.9745  | 2.9745  |
| H | -1.9386 | 3.4944  | 3.4944  | C                   | 0.8084       | 2.9277  | 2.9277  | H | -2.3213 | 0.6958  | 0.6958  |
| H | -2.8189 | 2.8705  | 2.8705  | C                   | 1.2470       | 1.6781  | 1.6781  | H | -3.8011 | -1.1453 | -1.1453 |
| H | -2.2859 | 0.6530  | 0.6530  | C                   | 2.4946       | -1.0235 | -1.0235 | H | -5.0180 | -1.3305 | -1.3305 |
| H | -3.5031 | -1.8954 | -1.8954 | C                   | 3.6015       | -0.1556 | -0.1556 | H | -3.9090 | -2.3506 | -2.3506 |
| H | -5.2281 | -2.3171 | -2.3171 | C                   | 4.4774       | -0.1488 | -0.1488 | H | -1.5710 | -3.1988 | -3.1988 |

|                                 |         |         |         |                                |         |         |         |   |         |         |         |
|---------------------------------|---------|---------|---------|--------------------------------|---------|---------|---------|---|---------|---------|---------|
| H                               | -0.3310 | -2.9415 | -2.9415 | C                              | 2.6016  | -1.3116 | -1.3116 | C | -3.1850 | 1.5900  | 1.5900  |
| Cl                              | -2.4094 | -2.7012 | -2.7012 | H                              | -1.7366 | 0.0244  | 0.0244  | C | -1.9843 | 0.9239  | 0.9239  |
|                                 |         |         |         | H                              | -3.6391 | 1.4924  | 1.4924  | C | -1.5060 | -0.0123 | -0.0123 |
|                                 |         |         |         | H                              | -4.3357 | 1.6283  | 1.6283  | P | -0.0740 | -1.1209 | -1.1209 |
|                                 |         |         |         | H                              | -3.1506 | 0.2807  | 0.2807  | C | 1.2666  | -0.2137 | -0.2137 |
| <b>Ph2PCI</b>                   |         |         |         | H                              | -1.2317 | -1.1724 | -1.1724 | C | 2.4742  | -0.8926 | -0.8926 |
|                                 |         |         |         | H                              | 0.3420  | 1.2211  | 1.2211  | C | 2.6378  | -2.3462 | -2.3462 |
| E: -1263.496189                 |         |         |         | H                              | 2.1338  | 2.4388  | 2.4388  | C | 3.5096  | -0.1870 | -0.1870 |
| $H_{\text{cont}}$ : 0.198724686 |         |         |         | H                              | 4.2385  | 1.2676  | 1.2676  | C | 3.3748  | 1.1589  | 1.1589  |
| $G_{\text{cont}}$ : 0.146661146 |         |         |         | H                              | 4.5248  | -1.1462 | -1.1462 | C | 2.1826  | 1.8229  | 1.8229  |
| $E_{\text{sp}}$ : -1264.26106   |         |         |         | H                              | 2.7292  | -2.3718 | -2.3718 | C | 1.1392  | 1.1383  | 1.1383  |
|                                 |         |         |         |                                |         |         |         | H | -2.2605 | -1.9196 | -1.9196 |
|                                 |         |         |         |                                |         |         |         | H | -0.6175 | -1.8622 | -1.8622 |
| Cl                              | 0.0061  | -3.3034 | -3.3034 |                                |         |         |         | H | -0.7323 | -0.8740 | -0.8740 |
| P                               | 0.1309  | -1.5549 | -1.5549 |                                |         |         |         | H | -0.7323 | -0.8740 | -0.8740 |
| C                               | -1.3584 | -0.6495 | -0.6495 | <b>ts4-otolotol</b>            |         |         |         | H | -4.0504 | 0.1152  | 0.1152  |
| C                               | -2.0469 | 0.0880  | 0.0880  | E: -881.9736116                |         |         |         | H | -4.8798 | 1.7934  | 1.7934  |
| C                               | -3.1111 | 0.9130  | 0.9130  | $H_{\text{cont}}$ : 0.24641078 |         |         |         | H | -3.5570 | 2.3260  | 2.3260  |
| C                               | -3.5010 | 0.9866  | 0.9866  | $G_{\text{cont}}$ : 0.19250582 |         |         |         | H | -1.4244 | 1.1256  | 1.1256  |
| C                               | -2.8329 | 0.2292  | 0.2292  | $E_{\text{sp}}$ : -881.9736107 |         |         |         | H | 1.9244  | -2.9694 | -2.9694 |
| C                               | -1.7653 | -0.5849 | -0.5849 |                                |         |         |         | H | 3.6499  | -2.6976 | -2.6976 |
| C                               | 1.4101  | -0.6620 | -0.6620 |                                |         |         |         | H | 2.4504  | -2.5432 | -2.5432 |
| C                               | 1.2607  | 0.6965  | 0.6965  | C                              | -1.6215 | -1.2177 | -1.2177 | H | 4.4422  | -0.7096 | -0.7096 |
| C                               | 2.2739  | 1.3842  | 1.3842  | C                              | -2.2298 | -0.2827 | -0.2827 | H | 4.2014  | 1.6857  | 1.6857  |
| C                               | 3.4485  | 0.7282  | 0.7282  | C                              | -3.4652 | 0.3470  | 0.3470  | H | 2.0580  | 2.8742  | 2.8742  |
| C                               | 3.6092  | -0.6224 | -0.6224 | C                              | -3.9277 | 1.2885  | 1.2885  | H | 0.2045  | 1.6596  | 1.6596  |

## 6 – References

- 1 F. Neese, *Wiley Interdiscip. Rev. Comput. Mol. Sci.*, 2018, **8**, 4–9.
- 2 A. Hellweg, C. Hättig, S. Höfener and W. Klopper, *Theor. Chem. Acc.*, 2007, **117**, 587–597.
- 3 C. Adamo and V. Barone, *J. Chem. Phys.*, 1999, **110**, 6158–6170.
- 4 S. Grimme, S. Ehrlich and L. Goerigk, *J. Comput. Chem.*, 2011, **32**, 1456–1465.
- 5 S. Grimme, J. Antony, S. Ehrlich and H. Krieg, *J. Chem. Phys.*, 2010, **132**, 154104.
- 6 F. Weigend and R. Ahlrichs, *Phys. Chem. Chem. Phys.*, 2005, **7**, 3297–3305.
- 7 S. Grimme, *Chem. Eur. J.*, 2012, **18**, 9955–9964.



- 8 A. V. Marenich, C. J. Cramer and D. G. Truhlar, *J. Phys. Chem. B*, 2009, **113**, 6378–6396.
- 9 T. A. Young, J. J. Silcock, A. J. Sterling and F. Duarte, *Angew. Chem. Int. Ed.*, 2020, 4266–4274.
- 10 T. Yanai, D. P. Tew and N. C. Handy, *Chem. Phys. Lett.*, 2004, **393**, 51–57.
- 11 Y. Zhao and D. G. Truhlar, *Theor. Chem. Acc.*, 2008, **120**, 215–241.
- 12 T. Lu and F. Chen, *J. Phys. Chem. A*, 2013, **117**, 3100–3108.
- 13 T. Lu and F. Chen, *J. Comput. Chem.*, 2012, **33**, 580–592.
- 14 Y. Shao, Y. Mei, D. Sundholm and V. R. I. Kaila, *J. Chem. Theory Comput.*, 2020, **16**, 587–600.
- 15 D. Jacquemin, V. Wathelet, E. A. Perpète and C. Adamo, *J. Chem. Theory Comput.*, 2009, **5**, 2420–2435.
